# Supplementary material for: A Prokaryotic Membrane Sculpting BAR Domain Protein
Source: bioRxiv preprint, doi:10.1101/2020.01.30.926147, version 3 (2020-06-10)
Supplement: Supplemental Table 1 [file 926147_file02.xlsx]

## Sheet: proteinGroups
Majority protein IDs	Fasta headers	log2FC V/M	95% CI.L	95% CI.R	adj.P.Val
Q8EHZ5	Periplasmic alanyl aminopeptidase OS=Shewanella oneidensis (strain MR-1) OX=211586 GN=SO_1059 PE=4 SV=1	5.28654	2.94655	7.62652	0.00779953
Q8EFB9	Membrane-anchored YbdH domain protein OS=Shewanella oneidensis (strain MR-1) OX=211586 GN=SO_2064 PE=4 SV=1	5.27244	3.99274	6.55215	0.00161714
Q8EDK0	Cell division coordinator CpoB OS=Shewanella oneidensis (strain MR-1) OX=211586 GN=ybgF PE=3 SV=1	4.98525	2.17777	7.79273	0.0135221
Q8EJB3	Uncharacterized protein OS=Shewanella oneidensis (strain MR-1) OX=211586 GN=SO_0554 PE=4 SV=1	4.96135	3.01787	6.90483	0.0068204
Q8EBC3	Sulfate/thiosulfate import ATP-binding protein CysA 1 OS=Shewanella oneidensis (strain MR-1) OX=211586 GN=cysA1 PE=3 SV=1	4.85885	2.96544	6.75226	0.0068204
Q8EC34	Membrane anchored protein with DUF2133 domain OS=Shewanella oneidensis (strain MR-1) OX=211586 GN=SO_3310 PE=4 SV=1	4.84999	2.26591	7.43407	0.0114551
Q8EGG6	Periplasmic chaperone for outer membrane proteins Skp OS=Shewanella oneidensis (strain MR-1) OX=211586 GN=skp PE=3 SV=1	4.82965	2.00239	7.65691	0.0148633
Q8EJ71	N-acetylmuramoyl-L-alanine amidase AmiB OS=Shewanella oneidensis (strain MR-1) OX=211586 GN=amiB PE=4 SV=1	4.71537	3.24213	6.18861	0.00330344
Q8EBM6	HAE1 family efflux pump permease component OS=Shewanella oneidensis (strain MR-1) OX=211586 GN=SO_3484 PE=3 SV=1	4.67691	3.20158	6.15223	0.00391269
Q8EH30	RCC1/BLIP-II superfamily protein OS=Shewanella oneidensis (strain MR-1) OX=211586 GN=SO_1401 PE=4 SV=1	4.66865	2.35184	6.98545	0.00997109
Q8EEV9	Uncharacterized protein OS=Shewanella oneidensis (strain MR-1) OX=211586 GN=SO_2254 PE=4 SV=1	4.37014	2.1672	6.57307	0.0107203
Q8EKL6	Outer membrane morn variant repeat-containing protein OS=Shewanella oneidensis (strain MR-1) OX=211586 GN=SO_0076 PE=4 SV=1	4.35619	2.50074	6.21164	0.00730936
Q8EF24	Diheme cytochrome c5 peroxidase CcpA OS=Shewanella oneidensis (strain MR-1) OX=211586 GN=ccpA PE=1 SV=1	4.33912	2.40091	6.27732	0.00779953
Q8EIK4	Putative periplasmic peptidase C15 superfamily OS=Shewanella oneidensis (strain MR-1) OX=211586 GN=SO_0835 PE=4 SV=1	4.30797	2.56729	6.04865	0.00713064
Q8EK39	Periplasmic monoheme cytochrome c5 ScyA OS=Shewanella oneidensis (strain MR-1) OX=211586 GN=scyA PE=4 SV=1	4.21344	2.00741	6.41946	0.0108124
Q8E9G4	Type I protein secretion system MFP component AggB OS=Shewanella oneidensis (strain MR-1) OX=211586 GN=aggB PE=4 SV=2	4.18833	2.6389	5.73777	0.00537046
Q8EFE1	Soluble lytic murein transglycosylase SltY OS=Shewanella oneidensis (strain MR-1) OX=211586 GN=sltY PE=4 SV=1	4.11581	2.06198	6.16965	0.0100136
Q8EGV9	TonB-dependent receptor OS=Shewanella oneidensis (strain MR-1) OX=211586 GN=SO_1482 PE=3 SV=1	4.06439	2.22936	5.89943	0.00809261
Q8EKC7	T2aSS secretion system inner membrane platform protein GspF OS=Shewanella oneidensis (strain MR-1) OX=211586 GN=gspF PE=3 SV=1	4.02417	2.20154	5.84679	0.0081584
Q8EK06	Outer membrane lipoprotein LppC OS=Shewanella oneidensis (strain MR-1) OX=211586 GN=lppC PE=4 SV=1	4.00144	2.26516	5.73772	0.00768089
Q8EHC5	Uncharacterized protein OS=Shewanella oneidensis (strain MR-1) OX=211586 GN=SO_1303 PE=4 SV=1	4.00136	2.72296	5.27975	0.00342986
Q8EGT4	C-terminal Bar domain-containing protein (BdpA) OS=Shewanella oneidensis (strain MR-1) OX=211586 GN=SO_1507 PE=4 SV=1	3.97822	2.52144	5.43499	0.00537046
Q8EH07	Predicted outer membrane lipoprotein OS=Shewanella oneidensis (strain MR-1) OX=211586 GN=SO_1424 PE=4 SV=1	3.93603	1.89634	5.97573	0.0107203
Q8EAT1	Uncharacterized protein OS=Shewanella oneidensis (strain MR-1) OX=211586 GN=SO_3811 PE=4 SV=1	3.9333	1.74305	6.12355	0.0129733
Q8E9L8	Subfamily S9C unassigned peptidase OS=Shewanella oneidensis (strain MR-1) OX=211586 GN=SO_4252 PE=4 SV=1	3.90399	2.52953	5.27846	0.0049283
Q8EC30	Outer membrane PilQ pilotin PilF OS=Shewanella oneidensis (strain MR-1) OX=211586 GN=pilF PE=4 SV=1	3.88534	2.51733	5.25336	0.00537046
Q8E8D3	Uncharacterized protein OS=Shewanella oneidensis (strain MR-1) OX=211586 GN=SO_4732 PE=4 SV=1	3.8482	2.13725	5.55914	0.00779953
Q8EH06	Outer membrane morn variant repeat-containing protein OS=Shewanella oneidensis (strain MR-1) OX=211586 GN=SO_1425 PE=4 SV=1	3.84047	1.6358	6.04513	0.0141155
Q8EJX3	Thiol:disulfide interchange protein OS=Shewanella oneidensis (strain MR-1) OX=211586 GN=dsbA PE=3 SV=1	3.82163	1.97613	5.66713	0.00937752
K4PU34	Glycosyl transferase OS=Shewanella oneidensis (strain MR-1) OX=211586 GN=SO_3139 PE=4 SV=1	3.81815	2.68624	4.95007	0.0029913
Q8EAX8	Polyamine aminopropyltransferase OS=Shewanella oneidensis (strain MR-1) OX=211586 GN=speE PE=3 SV=1	3.81793	2.32371	5.31214	0.0068204
Q8E9A0	Uncharacterized protein OS=Shewanella oneidensis (strain MR-1) OX=211586 GN=SO_4384 PE=4 SV=1	3.80027	1.97656	5.62399	0.00932318
Q8EKG1	Flagellar protein FliL OS=Shewanella oneidensis (strain MR-1) OX=211586 GN=SO_0132 PE=3 SV=1	3.78154	2.39311	5.16997	0.00537046
Q8EBM7	HAE1 family efflux pump MFP component OS=Shewanella oneidensis (strain MR-1) OX=211586 GN=SO_3483 PE=3 SV=1	3.75847	2.15802	5.35892	0.00730936
Q8EFY3	Uncharacterized protein OS=Shewanella oneidensis (strain MR-1) OX=211586 GN=SO_1831 PE=4 SV=1	3.7526	1.57978	5.92543	0.0144574
Q8EDF6	Uncharacterized protein OS=Shewanella oneidensis (strain MR-1) OX=211586 GN=SO_2796 PE=4 SV=1	3.69921	2.00984	5.38858	0.00838815
Q8EC28	Uncharacterized protein OS=Shewanella oneidensis (strain MR-1) OX=211586 GN=SO_3316 PE=4 SV=1	3.68637	1.80837	5.56436	0.0103527
Q8EBS9	Monoheme cytochrome c OS=Shewanella oneidensis (strain MR-1) OX=211586 GN=SO_3420 PE=4 SV=1	3.68602	1.55282	5.81921	0.0144574
Q8EB95	Chaperone SurA OS=Shewanella oneidensis (strain MR-1) OX=211586 GN=surA PE=3 SV=1	3.66878	1.56733	5.77024	0.014042
Q8EIS1	Putative periplasmic protein OS=Shewanella oneidensis (strain MR-1) OX=211586 GN=SO_0764 PE=4 SV=1	3.66481	1.87504	5.45459	0.00948929
Q8EJQ3	Thioredoxin family protein OS=Shewanella oneidensis (strain MR-1) OX=211586 GN=SO_0409 PE=4 SV=1	3.65728	1.64012	5.67445	0.0126606
Q8EFT5	HAE1 family efflux pump MFP component OS=Shewanella oneidensis (strain MR-1) OX=211586 GN=SO_1881 PE=3 SV=1	3.64401	1.84392	5.4441	0.00988834
Q8E8U5	Uncharacterized protein OS=Shewanella oneidensis (strain MR-1) OX=211586 GN=SO_4561 PE=4 SV=1	3.59256	2.28744	4.89767	0.00631686
Q8EJN5	Bifunctional outer membrane translocase / extracellular lipase PlpD OS=Shewanella oneidensis (strain MR-1) OX=211586 GN=plpD PE=4 SV=1	3.57733	1.72275	5.4319	0.0107203
Q8EJM3	ImpA-like cell surface immunomodulating metalloprotease OS=Shewanella oneidensis (strain MR-1) OX=211586 GN=SO_0440 PE=4 SV=1	3.57598	1.98594	5.16603	0.00779953
Q8EH82	Signal peptidase I OS=Shewanella oneidensis (strain MR-1) OX=211586 GN=lepB PE=3 SV=1	3.57495	1.65892	5.49097	0.0116761
Q8EA01	MSHA biogenesis protein MshG OS=Shewanella oneidensis (strain MR-1) OX=211586 GN=mshG PE=4 SV=1	3.57409	1.92551	5.22268	0.00929471
Q8ED86	Uncharacterized protein OS=Shewanella oneidensis (strain MR-1) OX=211586 GN=SO_2878 PE=4 SV=1	3.57089	1.89819	5.24359	0.00887996
Q8EHV3	FAD:protein FMN transferase OS=Shewanella oneidensis (strain MR-1) OX=211586 GN=apbE PE=3 SV=1	3.56711	1.70223	5.43199	0.0108124
Q8EAQ4	Secreted low complexity protein OS=Shewanella oneidensis (strain MR-1) OX=211586 GN=SO_3842 PE=4 SV=1	3.52128	1.56559	5.47697	0.0129144
Q8EBY8	Outer membrane protein OS=Shewanella oneidensis (strain MR-1) OX=211586 GN=SO_3357 PE=4 SV=1	3.515	2.15916	4.87085	0.00713064
Q8EJK7	Alpha-ketoglutarate uptake system substrate-binding component OS=Shewanella oneidensis (strain MR-1) OX=211586 GN=SO_0456 PE=4 SV=1	3.50233	1.93782	5.06683	0.00779953
Q8EBC6	ABC-type sulfate/thiosulfate uptake system substrate-binding component CysP OS=Shewanella oneidensis (strain MR-1) OX=211586 GN=cysP PE=4 SV=1	3.46668	2.08479	4.84857	0.00713064
Q8EA94	HAE1 family effllux pump permease component OS=Shewanella oneidensis (strain MR-1) OX=211586 GN=SO_4014 PE=3 SV=1	3.45041	1.87359	5.02723	0.00838815
Q8EEE8	Bifunctional periplasmic substrate binding protein/cytoplasmic diguanylate cyclase OS=Shewanella oneidensis (strain MR-1) OX=211586 GN=SO_2434 PE=4 SV=1	3.44126	-1.86869	8.7512	0.250555
Q8E840	Periplasmic metal-dependent aminohydrolase family protein OS=Shewanella oneidensis (strain MR-1) OX=211586 GN=SO_A0100 PE=4 SV=1	3.43918	1.7868	5.09155	0.00932318
Q8E9B9	Uncharacterized protein OS=Shewanella oneidensis (strain MR-1) OX=211586 GN=SO_4365 PE=4 SV=1	3.42215	1.55218	5.29212	0.0123708
Q8EB18	Thiol:disulfide interchange protein DsbA family OS=Shewanella oneidensis (strain MR-1) OX=211586 GN=SO_3718 PE=4 SV=1	3.41227	2.00943	4.8151	0.00724308
K4PSX9	Periplasmic peptidase family M16B OS=Shewanella oneidensis (strain MR-1) OX=211586 GN=SO_4811 PE=4 SV=1	3.39602	1.62393	5.1681	0.0108124
Q8EGB4	Outer membrane lipoprotein Blc OS=Shewanella oneidensis (strain MR-1) OX=211586 GN=blc PE=3 SV=1	3.37892	1.95291	4.80492	0.00730936
Q8E9C8	Predicted lipoprotein OS=Shewanella oneidensis (strain MR-1) OX=211586 GN=SO_4356 PE=4 SV=1	3.37563	1.81554	4.93571	0.00848262
Q8EF07	Peptidase M28 family OS=Shewanella oneidensis (strain MR-1) OX=211586 GN=SO_2198 PE=4 SV=2	3.3726	1.60104	5.14415	0.0117559
Q8EKP3	Predicted non-catalytic member of peptidase subfamily M23B OS=Shewanella oneidensis (strain MR-1) OX=211586 GN=SO_0048 PE=4 SV=2	3.37218	2.33905	4.40532	0.00330344
Q8ECI4	Uncharacterized protein OS=Shewanella oneidensis (strain MR-1) OX=211586 GN=wbfC PE=4 SV=1	3.36846	1.56229	5.17464	0.0116761
Q8EAI8	TonB-dependent siderophore receptor OS=Shewanella oneidensis (strain MR-1) OX=211586 GN=SO_3914 PE=3 SV=1	3.36577	1.3639	5.36764	0.0156563
Q8EIC0	Uncharacterized protein OS=Shewanella oneidensis (strain MR-1) OX=211586 GN=SO_0923 PE=4 SV=1	3.36459	1.98084	4.74835	0.00724308
Q8EAF5	ABC-type phospholipid uptake (Salvage) system periplasmic chaperone MlaC OS=Shewanella oneidensis (strain MR-1) OX=211586 GN=mlaC PE=4 SV=1	3.34409	1.81464	4.87354	0.00838815
K4PU47	Predicted non-catalytic member of peptidase subfamily M16B OS=Shewanella oneidensis (strain MR-1) OX=211586 GN=SO_4538 PE=4 SV=1	3.33745	1.79046	4.88444	0.00852879
Q8ECZ9	Lambda phage uncharacterized protein OS=Shewanella oneidensis (strain MR-1) OX=211586 GN=SO_2972 PE=4 SV=1	3.32542	1.72406	4.92678	0.00932318
Q8EK26	Penicillin-binding protein 1A McrA OS=Shewanella oneidensis (strain MR-1) OX=211586 GN=mcrA PE=4 SV=1	3.31968	1.85198	4.78739	0.00779953
Q8EF79	Glucans biosynthesis protein G 1 OS=Shewanella oneidensis (strain MR-1) OX=211586 GN=opgG1 PE=3 SV=2	3.30882	1.78933	4.82832	0.00847949
Q8E9X3	TPR repeat protein OS=Shewanella oneidensis (strain MR-1) OX=211586 GN=SO_4139 PE=4 SV=1	3.30309	1.72436	4.88183	0.00932318
Q8EK09	BON domain lipoprotein OS=Shewanella oneidensis (strain MR-1) OX=211586 GN=SO_0297 PE=4 SV=1	3.30036	1.68096	4.91976	0.00965876
Q8ED29	Lambda phage transcriptional regulator OS=Shewanella oneidensis (strain MR-1) OX=211586 GN=SO_2942 PE=4 SV=1	3.29736	1.64929	4.94542	0.0100136
Q8EHF3	Putrescine-binding periplasmic protein OS=Shewanella oneidensis (strain MR-1) OX=211586 GN=potF PE=3 SV=1	3.29627	1.62231	4.97022	0.0103527
Q8EI46	Putative inner membrane lipoprotein OS=Shewanella oneidensis (strain MR-1) OX=211586 GN=SO_1004 PE=4 SV=2	3.29521	1.49006	5.10037	0.0124199
Q8EA62	SoxA-like diheme cytochrome c OS=Shewanella oneidensis (strain MR-1) OX=211586 GN=SO_4047 PE=4 SV=1	3.29473	1.43323	5.15622	0.0135521
Q8EFX1	Extracellular nuclease ExeS OS=Shewanella oneidensis (strain MR-1) OX=211586 GN=exeS PE=4 SV=1	3.27973	1.91883	4.64063	0.00724308
Q8EA91	Membrane bound lytic murein transglycosylase MltD OS=Shewanella oneidensis (strain MR-1) OX=211586 GN=mltD PE=4 SV=1	3.27686	1.51592	5.03779	0.0117559
Q8EDA2	Thiol:disulfide interchange protein OS=Shewanella oneidensis (strain MR-1) OX=211586 GN=SO_2860 PE=3 SV=1	3.25947	1.77423	4.7447	0.00894519
Q8EG89	Putative lipoprotein OS=Shewanella oneidensis (strain MR-1) OX=211586 GN=SO_1717 PE=4 SV=1	3.25226	1.56564	4.93887	0.0114062
Q8E9Z5	MSHA biogenesis protein MshJ OS=Shewanella oneidensis (strain MR-1) OX=211586 GN=mshJ PE=4 SV=1	3.23384	1.9983	4.46939	0.00713064
Q8E8C1	ATP synthase epsilon chain OS=Shewanella oneidensis (strain MR-1) OX=211586 GN=atpC PE=3 SV=1	3.22112	1.1622	5.28004	0.0211543
Q8EBE4	Outer membrane protein assembly factor BamD OS=Shewanella oneidensis (strain MR-1) OX=211586 GN=bamD PE=3 SV=2	3.2179	1.64598	4.78981	0.00948929
Q8EDG5	Cold shock protein CspA OS=Shewanella oneidensis (strain MR-1) OX=211586 GN=cspA PE=4 SV=1	3.2136	1.25271	5.1745	0.0175681
Q8EDY9	Periplasmic C-terminal processing protease Prc OS=Shewanella oneidensis (strain MR-1) OX=211586 GN=prc PE=3 SV=1	3.2059	1.64562	4.76618	0.00948929
Q8EC35	Outer membrane protein assembly factor BamB OS=Shewanella oneidensis (strain MR-1) OX=211586 GN=bamB PE=3 SV=1	3.1932	1.4591	4.92729	0.0122117
Q8EH26	Periplasmic transglutaminase family protein OS=Shewanella oneidensis (strain MR-1) OX=211586 GN=SO_1405 PE=4 SV=1	3.1783	1.4161	4.9405	0.0128833
Q8EG15	Peptidylprolyl isomerase OS=Shewanella oneidensis (strain MR-1) OX=211586 GN=ppiD PE=4 SV=1	3.16691	1.61283	4.72099	0.00965876
Q8EAR1	Outer-membrane lipoprotein LolB OS=Shewanella oneidensis (strain MR-1) OX=211586 GN=lolB PE=3 SV=1	3.16166	1.34966	4.97366	0.0147949
Q8EFT6	Outer membrane protein assembly factor BamC OS=Shewanella oneidensis (strain MR-1) OX=211586 GN=bamC PE=3 SV=1	3.15354	1.56655	4.74054	0.010146
Q8E983	Uncharacterized protein OS=Shewanella oneidensis (strain MR-1) OX=211586 GN=SO_4403 PE=4 SV=2	3.15004	2.03277	4.26732	0.0049283
Q8E8E6	ABC-type tungstate uptake system substrate-binding component TupA OS=Shewanella oneidensis (strain MR-1) OX=211586 GN=tupA PE=4 SV=1	3.1436	1.56581	4.72139	0.0101422
Q8ED33	Lambda phage encoded lipoprotein OS=Shewanella oneidensis (strain MR-1) OX=211586 GN=SO_2938 PE=4 SV=1	3.14209	1.52867	4.75551	0.0105407
Q8EAD9	Orphan ABC-type transport system substrate-binding component OS=Shewanella oneidensis (strain MR-1) OX=211586 GN=SO_3967 PE=4 SV=2	3.13897	1.56403	4.71391	0.0101422
Q8EJH4	Oligopeptidase lipoprotein M13 family OS=Shewanella oneidensis (strain MR-1) OX=211586 GN=SO_0491 PE=4 SV=1	3.13872	1.55875	4.7187	0.010146
Q8EFZ8	UPF0319 protein SO_1816 OS=Shewanella oneidensis (strain MR-1) OX=211586 GN=SO_1816 PE=3 SV=1	3.13791	1.36357	4.91226	0.0135722
Q8EC31	Transmembrane cell shape protein RodZ OS=Shewanella oneidensis (strain MR-1) OX=211586 GN=rodZ PE=4 SV=1	3.13008	1.28643	4.97373	0.0150328
Q8EF72	Outer membrane protein Omp85 family OS=Shewanella oneidensis (strain MR-1) OX=211586 GN=SO_2114 PE=4 SV=1	3.12799	1.29539	4.96059	0.014865
Q8EE61	Predicted rhombotail lipoprotein OS=Shewanella oneidensis (strain MR-1) OX=211586 GN=SO_2529 PE=4 SV=1	3.11424	1.6153	4.61318	0.00932318
Q8E8Y4	TonB-dependent siderophore receptor OS=Shewanella oneidensis (strain MR-1) OX=211586 GN=SO_4516 PE=3 SV=1	3.11091	1.37239	4.84943	0.0138371
Q8EI93	Thiol:disulfide interchange protein OS=Shewanella oneidensis (strain MR-1) OX=211586 GN=dsbC PE=3 SV=1	3.1096	1.09436	5.12483	0.0233189
Q8EFZ0	TonB2 energy transduction system periplasmic component OS=Shewanella oneidensis (strain MR-1) OX=211586 GN=SO_1824 PE=4 SV=2	3.10924	1.59909	4.61939	0.00948824
Q8EEL9	Cbb3-type cytochrome oxidase assembly protein CcoH OS=Shewanella oneidensis (strain MR-1) OX=211586 GN=ccoH PE=4 SV=1	3.10582	1.44573	4.76591	0.012374
Q8ECU0	TonB-dependent ferric putrebactin siderophore receptor PutA OS=Shewanella oneidensis (strain MR-1) OX=211586 GN=putA PE=3 SV=2	3.10194	-0.276463	6.48033	0.120743
Q8EHQ2	Endolytic peptidoglycan transglycosylase RlpA OS=Shewanella oneidensis (strain MR-1) OX=211586 GN=rlpA PE=3 SV=1	3.10166	1.61256	4.59076	0.00988834
Q8EDJ8	Protein TolB OS=Shewanella oneidensis (strain MR-1) OX=211586 GN=tolB PE=3 SV=1	3.09806	1.57608	4.62004	0.00967017
Q8ECI5	Polysaccharide biosynthesis lipoprotein WbfD OS=Shewanella oneidensis (strain MR-1) OX=211586 GN=wbfD PE=4 SV=1	3.06729	1.72149	4.41309	0.00779953
Q8EK35	Formate-dependent nitrite reductase complex subunit OS=Shewanella oneidensis (strain MR-1) OX=211586 GN=ccmH PE=3 SV=1	3.06251	1.69855	4.42648	0.00779953
Q8E841	Periplasmic amidohydrolase family protein OS=Shewanella oneidensis (strain MR-1) OX=211586 GN=SO_A0099 PE=4 SV=1	3.04759	1.43715	4.65803	0.0112068
Q8E8U9	Methyl-accepting chemotaxis protein with Cache sensory domain OS=Shewanella oneidensis (strain MR-1) OX=211586 GN=SO_4557 PE=4 SV=1	3.04272	1.73949	4.34596	0.00743275
Q8ECZ8	Lambda phage lysozyme R OS=Shewanella oneidensis (strain MR-1) OX=211586 GN=R PE=4 SV=1	3.04225	1.32391	4.7606	0.0135521
Q8EDX7	Endolytic murein transglycosylase OS=Shewanella oneidensis (strain MR-1) OX=211586 GN=yceG PE=3 SV=1	3.03839	1.42167	4.65511	0.0114082
Q8EDL2	Glucans biosynthesis protein G 2 OS=Shewanella oneidensis (strain MR-1) OX=211586 GN=opgG2 PE=3 SV=1	3.03679	1.65482	4.41876	0.00832031
Q8EHQ1	Lytic murein transglycosylase B MltB OS=Shewanella oneidensis (strain MR-1) OX=211586 GN=mltB PE=4 SV=1	3.03283	1.22324	4.84242	0.0158591
Q8EI47	Outer membrane morn variant repeat-containing protein OS=Shewanella oneidensis (strain MR-1) OX=211586 GN=SO_1003 PE=4 SV=1	3.03131	1.40895	4.65366	0.0116761
Q8EJG6	Uncharacterized protein OS=Shewanella oneidensis (strain MR-1) OX=211586 GN=SO_0501 PE=4 SV=1	3.01123	1.47536	4.5471	0.0103527
P83223	Fumarate reductase flavoprotein subunit OS=Shewanella oneidensis (strain MR-1) OX=211586 GN=SO_0970 PE=1 SV=2	3.01024	1.1592	4.86129	0.0181824
Q8EGM0	TonB-dependent haem/haemoglobin receptor OS=Shewanella oneidensis (strain MR-1) OX=211586 GN=SO_1580 PE=3 SV=1	3.00874	0.215378	5.80209	0.0788059
Q8EBJ1	Type IV pili system adhesin PilY OS=Shewanella oneidensis (strain MR-1) OX=211586 GN=pilY PE=4 SV=1	3.00078	1.31946	4.6821	0.0139989
Q8EE24	Outer membrane protein assembly protein AsmA OS=Shewanella oneidensis (strain MR-1) OX=211586 GN=asmA PE=4 SV=1	2.9859	1.30341	4.66838	0.0135221
Q8E9X4	Putative periplasmic protein OS=Shewanella oneidensis (strain MR-1) OX=211586 GN=SO_4138 PE=4 SV=1	2.9753	0.327846	5.62274	0.0695856
Q8EAK4	Putative quinoprotein dehydrogenase OS=Shewanella oneidensis (strain MR-1) OX=211586 GN=SO_3898 PE=4 SV=1	2.95147	1.52515	4.37779	0.0100136
Q8EC04	Thiol peroxidase OS=Shewanella oneidensis (strain MR-1) OX=211586 GN=tpx PE=3 SV=1	2.94654	1.61115	4.28192	0.0081584
Q8E968	CHAP domain protein OS=Shewanella oneidensis (strain MR-1) OX=211586 GN=SO_4418 PE=4 SV=1	2.94429	1.67036	4.21822	0.00784026
Q8EDL5	Protease HtpX OS=Shewanella oneidensis (strain MR-1) OX=211586 GN=htpX PE=3 SV=1	2.93717	1.7219	4.15245	0.00724308
Q8EFY8	TonB2 energy transduction system inner membrane component ExbB OS=Shewanella oneidensis (strain MR-1) OX=211586 GN=exbB PE=3 SV=2	2.93673	1.48253	4.39093	0.00994797
K4PW20	TonB-dependent ferric achromobactin receptor OS=Shewanella oneidensis (strain MR-1) OX=211586 GN=SO_4422 PE=3 SV=1	2.92859	1.41211	4.44507	0.0107203
Q8EGC9	Predicted lipoprotein OS=Shewanella oneidensis (strain MR-1) OX=211586 GN=SO_1675 PE=4 SV=2	2.91797	1.52003	4.31591	0.00932318
Q8EE57	Uncharacterized protein OS=Shewanella oneidensis (strain MR-1) OX=211586 GN=SO_2533 PE=4 SV=1	2.91025	1.71773	4.10277	0.00724308
Q8EH61	ABC-type lipopolysaccharide export system permease component 1 LptF OS=Shewanella oneidensis (strain MR-1) OX=211586 GN=lptF PE=4 SV=1	2.8977	1.64712	4.14828	0.00764735
Q8E875	Periplasmic prolyl oligopeptidase family protein OS=Shewanella oneidensis (strain MR-1) OX=211586 GN=SO_A0048 PE=4 SV=1	2.88932	1.37533	4.4033	0.0108124
Q8E832	Outer membrane protein OmpA family OS=Shewanella oneidensis (strain MR-1) OX=211586 GN=SO_A0114 PE=3 SV=1	2.88118	1.45839	4.30396	0.00988834
Q8EBF8	Predicted non-catalytic member of peptidase subfamily M16B OS=Shewanella oneidensis (strain MR-1) OX=211586 GN=SO_3560 PE=4 SV=1	2.87381	1.23367	4.51395	0.0138371
Q8EKI1	Inhibitor of invertebrate-type lysozyme PliI-like family OS=Shewanella oneidensis (strain MR-1) OX=211586 GN=SO_0112 PE=4 SV=1	2.86649	1.43506	4.29792	0.0105407
Q8EC20	Uncharacterized protein OS=Shewanella oneidensis (strain MR-1) OX=211586 GN=nrfJ PE=4 SV=1	2.86388	0.754455	4.9733	0.0367962
Q8EA93	HAE1 family effllux pump MFP component OS=Shewanella oneidensis (strain MR-1) OX=211586 GN=SO_4015 PE=3 SV=1	2.86185	1.27217	4.45153	0.0137317
Q8EAQ3	Thermoregulated outer membrane M13 family zinc endopeptidase PepO OS=Shewanella oneidensis (strain MR-1) OX=211586 GN=pepO PE=4 SV=1	2.85315	1.24688	4.45942	0.0135221
Q8EKF0	Oligopeptidase B PtrB OS=Shewanella oneidensis (strain MR-1) OX=211586 GN=ptrB PE=4 SV=2	2.85043	1.12318	4.57769	0.0169669
Q8E8B8	ATP synthase subunit alpha OS=Shewanella oneidensis (strain MR-1) OX=211586 GN=atpA PE=3 SV=1	2.84964	1.33839	4.36088	0.0113167
Q8EE07	Methyltransferase OS=Shewanella oneidensis (strain MR-1) OX=211586 GN=SO_2583 PE=4 SV=1	2.84626	1.1504	4.54212	0.015773
Q8ECJ2	Outer membrane RCS phosphorelay signaling cascade trigger RcsF OS=Shewanella oneidensis (strain MR-1) OX=211586 GN=rcsF PE=4 SV=1	2.84158	1.33879	4.34436	0.0112147
Q8EKB9	T2aSS secretion system protein GspN OS=Shewanella oneidensis (strain MR-1) OX=211586 GN=gspN PE=4 SV=1	2.8413	1.00447	4.67814	0.0231339
Q8E8X7	Iron-responsive TonB-dependent enterobactin receptor IrgA OS=Shewanella oneidensis (strain MR-1) OX=211586 GN=irgA PE=3 SV=2	2.83327	1.03631	4.63022	0.0205725
Q8EH85	Sigma E factor regulatory protein RseB OS=Shewanella oneidensis (strain MR-1) OX=211586 GN=rseB PE=4 SV=1	2.80088	1.38493	4.21683	0.0107457
Q8EI02	Probable glucans biosynthesis protein D OS=Shewanella oneidensis (strain MR-1) OX=211586 GN=opgD PE=3 SV=2	2.78294	1.32461	4.24127	0.0108124
Q8E987	Uncharacterized protein OS=Shewanella oneidensis (strain MR-1) OX=211586 GN=SO_4399 PE=4 SV=1	2.78151	0.867694	4.69532	0.0274143
Q8CVD2	Beta-N-acetylhexosaminidase HexB OS=Shewanella oneidensis (strain MR-1) OX=211586 GN=hexB PE=4 SV=1	2.77622	1.36757	4.18487	0.0103527
Q8EHM6	Protein translocase subunit SecD OS=Shewanella oneidensis (strain MR-1) OX=211586 GN=secD PE=3 SV=1	2.75881	0.965072	4.55254	0.0250914
Q8EB37	Putative periplasmic protein OS=Shewanella oneidensis (strain MR-1) OX=211586 GN=SO_3698 PE=4 SV=1	2.74945	0.910209	4.58868	0.0274143
Q8EF22	Periplasmic metalloprotease M23B family OS=Shewanella oneidensis (strain MR-1) OX=211586 GN=SO_2180 PE=4 SV=2	2.74485	1.39302	4.09668	0.010337
Q8EIF7	Oxidoreductase GMC family OS=Shewanella oneidensis (strain MR-1) OX=211586 GN=SO_0882 PE=4 SV=1	2.74325	1.35652	4.12998	0.010283
Q8EEU0	Nucleoside diphosphate kinase OS=Shewanella oneidensis (strain MR-1) OX=211586 GN=ndk PE=3 SV=1	2.74275	1.14292	4.34258	0.0146833
Q8EFY5	Putative Zn-dependent protease associated with TonB2 energy transduction system OS=Shewanella oneidensis (strain MR-1) OX=211586 GN=SO_1829 PE=4 SV=1	2.73516	1.30906	4.16127	0.0108124
Q8E816	Putative lipoprotein OS=Shewanella oneidensis (strain MR-1) OX=211586 GN=SO_A0140 PE=4 SV=1	2.72204	1.41301	4.03107	0.00932318
Q8EHY9	Peptidyl-prolyl cis-trans isomerase OS=Shewanella oneidensis (strain MR-1) OX=211586 GN=fklB PE=3 SV=1	2.70867	1.02024	4.3971	0.0194273
Q8E8B9	ATP synthase gamma chain OS=Shewanella oneidensis (strain MR-1) OX=211586 GN=atpG PE=3 SV=1	2.70489	1.42228	3.98751	0.00914881
Q8EIJ4	Periplasmic nitrate reductase, electron transfer subunit OS=Shewanella oneidensis (strain MR-1) OX=211586 GN=napB PE=2 SV=1	2.70026	0.863087	4.53744	0.0265016
Q8EHL0	Lipoprotein NlpI OS=Shewanella oneidensis (strain MR-1) OX=211586 GN=nlpI PE=4 SV=2	2.69865	1.19234	4.20496	0.0130651
Q8ECF1	Polysaccharide chain length determinant Wzz OS=Shewanella oneidensis (strain MR-1) OX=211586 GN=wzz PE=4 SV=1	2.69764	1.48842	3.90686	0.00784026
Q8EHZ8	Methyl accepting sensory transducer with Cache_1 small molecule binding domain OS=Shewanella oneidensis (strain MR-1) OX=211586 GN=SO_1056 PE=4 SV=1	2.6974	0.81232	4.58248	0.0289756
Q8EB90	Energy taxis modulating methyl accepting sensory transducer OS=Shewanella oneidensis (strain MR-1) OX=211586 GN=SO_3642 PE=4 SV=1	2.69128	1.33585	4.0467	0.010146
Q8ECM5	Protein translocase subunit SecD OS=Shewanella oneidensis (strain MR-1) OX=211586 GN=secD PE=3 SV=1	2.67564	1.40117	3.9501	0.00929471
Q8EKC6	T2aSS secretion system pseudopilus protein GspG OS=Shewanella oneidensis (strain MR-1) OX=211586 GN=gspG PE=4 SV=1	2.65778	1.4858	3.82976	0.00779953
Q8EI86	Alkyl hydroperoxide reductase peroxiredoxin component AhpC OS=Shewanella oneidensis (strain MR-1) OX=211586 GN=ahpC PE=4 SV=1	2.65551	-0.175682	5.48671	0.115122
Q8EEE5	Zn-dependent oligopeptidase OS=Shewanella oneidensis (strain MR-1) OX=211586 GN=SO_2437 PE=3 SV=2	2.65384	0.866771	4.44091	0.0267278
Q8ED06	Lambda phage portal protein B OS=Shewanella oneidensis (strain MR-1) OX=211586 GN=B PE=4 SV=1	2.6526	1.30274	4.00246	0.0103527
Q8EI08	Putative outer membrane protein OS=Shewanella oneidensis (strain MR-1) OX=211586 GN=SO_1045 PE=4 SV=2	2.64967	1.35891	3.94043	0.00948929
Q8EJH5	Transmembrane transcriptional regulator CadC family OS=Shewanella oneidensis (strain MR-1) OX=211586 GN=SO_0490 PE=4 SV=1	2.64382	1.29767	3.98998	0.0103527
Q8EFY6	Protein TonB OS=Shewanella oneidensis (strain MR-1) OX=211586 GN=tonB2 PE=3 SV=1	2.62953	1.28809	3.97097	0.0103527
Q8EIM5	RCC1/BLIP-II superfamily lipoprotein OS=Shewanella oneidensis (strain MR-1) OX=211586 GN=SO_0813 PE=4 SV=1	2.6222	1.34122	3.90317	0.00948929
Q8EHP1	Apolipoprotein N-acyltransferase OS=Shewanella oneidensis (strain MR-1) OX=211586 GN=lnt PE=3 SV=1	2.62174	1.30022	3.94326	0.0101467
Q8EG84	ABC-type high affinity phosphate uptake system permease component PstC OS=Shewanella oneidensis (strain MR-1) OX=211586 GN=pstC PE=3 SV=2	2.61775	0.853539	4.38197	0.0279406
Q8EHP9	Peptidoglycan D,D-transpeptidase MrdA OS=Shewanella oneidensis (strain MR-1) OX=211586 GN=mrdA PE=3 SV=1	2.61692	1.45608	3.77775	0.00779953
Q8EHQ3	D-alanyl-D-alanine carboxypeptidase DacA OS=Shewanella oneidensis (strain MR-1) OX=211586 GN=dacA PE=3 SV=2	2.6162	1.4363	3.7961	0.00809261
Q8EBF4	Dipeptidyl carboxypeptidase Dcp OS=Shewanella oneidensis (strain MR-1) OX=211586 GN=dcp PE=3 SV=1	2.61189	1.33878	3.88501	0.00948929
Q8EKF8	Uncharacterized protein OS=Shewanella oneidensis (strain MR-1) OX=211586 GN=SO_0135 PE=4 SV=1	2.6101	1.46305	3.75716	0.00779953
Q8EHM9	Putative periplasmic CbiK superfamily protein OS=Shewanella oneidensis (strain MR-1) OX=211586 GN=SO_1190 PE=4 SV=1	2.60916	0.878504	4.33982	0.0253189
Q8E8S0	Cytochrome c-type protein OS=Shewanella oneidensis (strain MR-1) OX=211586 GN=cymA PE=4 SV=1	2.60809	1.47068	3.7455	0.00778055
Q8E9Y6	Cell division protein FtsN OS=Shewanella oneidensis (strain MR-1) OX=211586 GN=ftsN PE=4 SV=1	2.60355	0.820108	4.38699	0.0279406
Q8EAW9	SH3 domain protein OS=Shewanella oneidensis (strain MR-1) OX=211586 GN=SO_3772 PE=4 SV=2	2.60137	1.35571	3.84704	0.00932318
Q8EI48	Outer membrane morn variant repeat-containing protein OS=Shewanella oneidensis (strain MR-1) OX=211586 GN=SO_1002 PE=4 SV=1	2.60032	0.932076	4.26856	0.0224886
Q8EAE7	Lipopolysaccharide export system protein LptA OS=Shewanella oneidensis (strain MR-1) OX=211586 GN=lptA PE=3 SV=1	2.59667	1.12124	4.0721	0.0137539
Q8E815	Outer membrane morn variant repeat-containing protein OS=Shewanella oneidensis (strain MR-1) OX=211586 GN=SO_A0141 PE=4 SV=1	2.59015	1.38741	3.79289	0.00856475
K4PU43	MSHA biogenesis protein MshI2 OS=Shewanella oneidensis (strain MR-1) OX=211586 GN=mshI2 PE=4 SV=1	2.58946	1.4627	3.71622	0.00774575
Q8EGJ6	Alkyl sulfatase OS=Shewanella oneidensis (strain MR-1) OX=211586 GN=SO_1606 PE=4 SV=1	2.58069	1.30144	3.85994	0.00995774
Q8EF27	Putative sulftase with DUF3413 domain YejM OS=Shewanella oneidensis (strain MR-1) OX=211586 GN=yejM PE=4 SV=1	2.57741	1.07749	4.07733	0.0145725
Q8EAJ5	Cytochrome oxidase copper metallochaperone OS=Shewanella oneidensis (strain MR-1) OX=211586 GN=SO_3907 PE=4 SV=1	2.57427	0.751197	4.39735	0.0319771
Q8E9Z6	MSHA biogenesis protein MshK OS=Shewanella oneidensis (strain MR-1) OX=211586 GN=mshK PE=4 SV=1	2.574	1.20535	3.94264	0.0114062
Q8EER2	Outer-membrane lipoprotein carrier protein OS=Shewanella oneidensis (strain MR-1) OX=211586 GN=lolA PE=3 SV=1	2.56773	1.13428	4.00117	0.0138371
Q8EAW2	ABC-type cysteine/glutathione export system bifunctional ATPase and permease component CydC OS=Shewanella oneidensis (strain MR-1) OX=211586 GN=cydC PE=4 SV=1	2.56132	1.35799	3.76466	0.00892062
Q8EDJ7	TolA energy-transducing system inner membrane component TolA OS=Shewanella oneidensis (strain MR-1) OX=211586 GN=tolA PE=4 SV=1	2.55184	1.27682	3.82687	0.0100136
Q8EDF3	Predicted lipoprotein OS=Shewanella oneidensis (strain MR-1) OX=211586 GN=SO_2799 PE=4 SV=1	2.5478	1.25139	3.84421	0.0108124
Q8EAC7	Cytochrome c-552 OS=Shewanella oneidensis (strain MR-1) OX=211586 GN=nrfA PE=1 SV=1	2.54711	1.06733	4.02689	0.014522
Q8EK04	Uncharacterized protein OS=Shewanella oneidensis (strain MR-1) OX=211586 GN=SO_0302 PE=4 SV=1	2.52479	0.726591	4.323	0.0343359
Q8EK38	Apo-cytochrome c chaperone CcmI OS=Shewanella oneidensis (strain MR-1) OX=211586 GN=ccmI PE=4 SV=1	2.51992	1.22487	3.81497	0.0105407
Q8EIJ1	Periplasmic nitrate reductase OS=Shewanella oneidensis (strain MR-1) OX=211586 GN=napA PE=3 SV=1	2.51397	1.23363	3.79431	0.0103527
Q8E8B7	ATP synthase subunit delta OS=Shewanella oneidensis (strain MR-1) OX=211586 GN=atpH PE=3 SV=1	2.50483	1.35179	3.65786	0.00848262
Q8E960	Putative periplasmic protein OS=Shewanella oneidensis (strain MR-1) OX=211586 GN=SO_4429 PE=4 SV=1	2.49706	0.821186	4.17293	0.0276799
Q8CVD0	Urocanate reductase OS=Shewanella oneidensis (strain MR-1) OX=211586 GN=urdA PE=1 SV=1	2.49051	1.13444	3.84658	0.0122697
Q8EK36	Cytochrome c maturation system membrane anchored thioredoxin CcmG OS=Shewanella oneidensis (strain MR-1) OX=211586 GN=ccmG PE=4 SV=1	2.4805	1.13395	3.82705	0.0122117
Q8EDJ3	Prolyl endopeptidase OS=Shewanella oneidensis (strain MR-1) OX=211586 GN=SO_2753 PE=4 SV=1	2.47933	1.21811	3.74054	0.0103527
Q8E8N4	Membrane sulfatase HI1246 family OS=Shewanella oneidensis (strain MR-1) OX=211586 GN=SO_4628 PE=4 SV=1	2.47179	1.12908	3.81451	0.0122117
Q8E8C4	TonB-dependent siderophore receptor OS=Shewanella oneidensis (strain MR-1) OX=211586 GN=SO_4743 PE=3 SV=2	2.47175	0.907512	4.03599	0.0204136
Q8EGG8	Zinc metalloprotease OS=Shewanella oneidensis (strain MR-1) OX=211586 GN=rseP PE=3 SV=1	2.45762	0.725361	4.18987	0.0329208
Q8EAB7	Periplasmic dipeptidylpeptidase IV Dpp4 OS=Shewanella oneidensis (strain MR-1) OX=211586 GN=dpp4 PE=4 SV=1	2.45683	1.07712	3.83655	0.0133967
Q8E8K2	LemA protein OS=Shewanella oneidensis (strain MR-1) OX=211586 GN=SO_4662 PE=4 SV=1	2.44532	1.08777	3.80286	0.0129144
Q8ECC1	Flagellar protein FliL OS=Shewanella oneidensis (strain MR-1) OX=211586 GN=fliL PE=3 SV=1	2.44312	0.488386	4.39785	0.0488518
Q8E8C0	ATP synthase subunit beta OS=Shewanella oneidensis (strain MR-1) OX=211586 GN=atpD PE=3 SV=1	2.41593	1.15049	3.68137	0.0108124
Q8EFY7	TonB2 energy transduction system membrane anchored component ExbD OS=Shewanella oneidensis (strain MR-1) OX=211586 GN=exbD PE=3 SV=1	2.41491	0.52729	4.30253	0.044221
Q8ED00	Lambda phage holin S OS=Shewanella oneidensis (strain MR-1) OX=211586 GN=S PE=4 SV=1	2.4111	0.617265	4.20493	0.0396403
Q8E858	Uncharacterized protein OS=Shewanella oneidensis (strain MR-1) OX=211586 GN=SO_A0070 PE=4 SV=1	2.39226	-0.149358	4.93388	0.112789
Q8ECM6	Protein-export membrane protein SecF OS=Shewanella oneidensis (strain MR-1) OX=211586 GN=secF PE=3 SV=1	2.3832	1.28185	3.48455	0.00848262
Q8EDF8	Uncharacterized protein OS=Shewanella oneidensis (strain MR-1) OX=211586 GN=SO_2794 PE=4 SV=1	2.37988	1.08396	3.67579	0.0129733
Q8ECN8	Anti-sigma factor OS=Shewanella oneidensis (strain MR-1) OX=211586 GN=SO_3097 PE=4 SV=1	2.37386	0.613473	4.13426	0.0392209
Q8EKT6	Membrane protein insertase YidC OS=Shewanella oneidensis (strain MR-1) OX=211586 GN=yidC PE=3 SV=1	2.37372	1.31436	3.43308	0.00779953
Q8E9G8	Uroporphyrin-III C-methyltransferase HemX OS=Shewanella oneidensis (strain MR-1) OX=211586 GN=hemX PE=4 SV=1	2.36847	1.06083	3.6761	0.0126914
Q8EDR3	Mu phage portal protein GpH OS=Shewanella oneidensis (strain MR-1) OX=211586 GN=gpH PE=4 SV=1	2.36367	1.11013	3.61721	0.0113167
Q8ECY0	Lambda phage lipoprotein OS=Shewanella oneidensis (strain MR-1) OX=211586 GN=SO_2991 PE=4 SV=1	2.36348	0.651555	4.07541	0.0333032
Q8EDI3	Peptidase M28A family OS=Shewanella oneidensis (strain MR-1) OX=211586 GN=SO_2766 PE=4 SV=2	2.36175	1.22094	3.50256	0.00937752
Q8EJE8	Heavy metal efflux pump MFP component CzcB family OS=Shewanella oneidensis (strain MR-1) OX=211586 GN=SO_0519 PE=4 SV=1	2.34828	0.820858	3.87571	0.0236183
Q8EJ66	Protein HflC OS=Shewanella oneidensis (strain MR-1) OX=211586 GN=hflC PE=3 SV=1	2.3405	1.23234	3.44867	0.00914881
Q8EF97	Lipid A biosynthesis myristoyltransferase OS=Shewanella oneidensis (strain MR-1) OX=211586 GN=lpxM PE=3 SV=1	2.34046	1.25904	3.42187	0.00848262
Q8EHX9	Dipeptydil peptidase S46 family OS=Shewanella oneidensis (strain MR-1) OX=211586 GN=SO_1075 PE=4 SV=1	2.3218	0.973645	3.66995	0.014522
Q8EHC9	T2aSS secretion system protein B GspB OS=Shewanella oneidensis (strain MR-1) OX=211586 GN=gspB PE=4 SV=1	2.30892	0.64008	3.97777	0.0360267
Q8EJP5	Type IV pilin protein PilA OS=Shewanella oneidensis (strain MR-1) OX=211586 GN=pilA PE=4 SV=1	2.30853	1.21602	3.40103	0.00914881
Q8EAQ8	Chemotaxis signal transduction system methyl accepting sensory transducer OS=Shewanella oneidensis (strain MR-1) OX=211586 GN=SO_3838 PE=4 SV=1	2.30686	1.03653	3.57718	0.012633
Q8EFY9	TonB2 energy transduction system inner membrane component TtpC OS=Shewanella oneidensis (strain MR-1) OX=211586 GN=ttpC PE=3 SV=1	2.3043	1.06998	3.53863	0.0116761
Q8EJN4	Cell surface zinc endopeptidase PepO OS=Shewanella oneidensis (strain MR-1) OX=211586 GN=pepO PE=4 SV=1	2.29165	1.05154	3.53177	0.0120769
Q8EFH8	Membrane-bound lytic transglycosylase MltB_2 family OS=Shewanella oneidensis (strain MR-1) OX=211586 GN=SO_1994 PE=4 SV=1	2.27687	0.930873	3.62288	0.0152823
Q8EJ67	Protein HflK OS=Shewanella oneidensis (strain MR-1) OX=211586 GN=hflK PE=3 SV=1	2.27592	1.1757	3.37614	0.00937752
Q8EB77	PilD processed protein OS=Shewanella oneidensis (strain MR-1) OX=211586 GN=SO_3655 PE=4 SV=1	2.27489	1.02499	3.52479	0.0133967
Q8EHY8	Extracellular endonuclease ExeM OS=Shewanella oneidensis (strain MR-1) OX=211586 GN=exeM PE=4 SV=1	2.27387	0.897825	3.64992	0.0168844
Q8EAF9	Serine protease DegS OS=Shewanella oneidensis (strain MR-1) OX=211586 GN=degS PE=4 SV=1	2.26651	0.559119	3.9739	0.0414161
Q8EAI4	Periplasmic peptidase subfamily S1B OS=Shewanella oneidensis (strain MR-1) OX=211586 GN=SO_3918 PE=4 SV=1	2.25521	1.09478	3.41565	0.0105407
Q8ECJ9	Dipepidyl carboxypeptidase II Dcp OS=Shewanella oneidensis (strain MR-1) OX=211586 GN=dcp PE=3 SV=1	2.25224	1.0255	3.47899	0.0122697
Q8EFA0	Phenylalanine--tRNA ligase alpha subunit OS=Shewanella oneidensis (strain MR-1) OX=211586 GN=pheS PE=3 SV=1	2.23909	-0.067974	4.54614	0.103352
Q8EIL6	Membrane-associated zinc metalloprotease M50B family OS=Shewanella oneidensis (strain MR-1) OX=211586 GN=SO_0823 PE=4 SV=1	2.22922	0.825171	3.63327	0.0203842
Q8EAY9	LD-transpeptidase YbiS OS=Shewanella oneidensis (strain MR-1) OX=211586 GN=ybiS PE=4 SV=1	2.21134	0.997119	3.42555	0.012553
Q8EF73	Outer membrane protein with carboxy terminal DUF490 domain OS=Shewanella oneidensis (strain MR-1) OX=211586 GN=SO_2113 PE=4 SV=1	2.20907	1.09882	3.31931	0.010146
Q8EH21	Periplasmic RmlC-type Cupin domain family protein OS=Shewanella oneidensis (strain MR-1) OX=211586 GN=SO_1410 PE=4 SV=2	2.20186	0.495017	3.90871	0.0441763
Q8EFC0	Outer membrane lipoprotein OS=Shewanella oneidensis (strain MR-1) OX=211586 GN=SO_2063 PE=4 SV=1	2.19633	0.445296	3.94737	0.049787
Q8EC02	Predicted lipoprotein OS=Shewanella oneidensis (strain MR-1) OX=211586 GN=SO_3343 PE=4 SV=1	2.19583	0.994398	3.39727	0.012374
Q8E945	ABC-type molybdate uptake system substrate-binding component ModA OS=Shewanella oneidensis (strain MR-1) OX=211586 GN=modA PE=4 SV=1	2.19316	0.496577	3.88974	0.0450458
Q8EDB4	Putative periplasmic protein OS=Shewanella oneidensis (strain MR-1) OX=211586 GN=SO_2848 PE=4 SV=1	2.19059	0.929058	3.45213	0.0148956
Q8EBC8	Predicted lipoprotein OS=Shewanella oneidensis (strain MR-1) OX=211586 GN=SO_3597 PE=4 SV=1	2.18352	0.964293	3.40275	0.0130651
Q8EJP7	Type IV pilus inner membrane protein PilC OS=Shewanella oneidensis (strain MR-1) OX=211586 GN=pilC PE=3 SV=1	2.16626	-0.197202	4.52972	0.119946
Q8E8B6	ATP synthase subunit b OS=Shewanella oneidensis (strain MR-1) OX=211586 GN=atpF PE=3 SV=1	2.15932	0.768319	3.55032	0.0215244
Q8EHP5	LPS-assembly lipoprotein LptE OS=Shewanella oneidensis (strain MR-1) OX=211586 GN=lptE PE=1 SV=1	2.15408	0.694796	3.61336	0.0260537
Q8EI56	Uncharacterized protein OS=Shewanella oneidensis (strain MR-1) OX=211586 GN=SO_0994 PE=4 SV=1	2.15067	0.850824	3.45052	0.0181824
Q8EJE5	Large-conductance mechanosensitive channel OS=Shewanella oneidensis (strain MR-1) OX=211586 GN=mscL PE=3 SV=1	2.14956	0.0231123	4.27602	0.0927152
Q8EG23	Peptidyl-prolyl cis-trans isomerase OS=Shewanella oneidensis (strain MR-1) OX=211586 GN=ppiB PE=3 SV=1	2.1489	0.485248	3.81255	0.0451138
Q8EDF0	Lipid A export ATP-binding/permease protein MsbA OS=Shewanella oneidensis (strain MR-1) OX=211586 GN=msbA PE=3 SV=1	2.13627	0.881361	3.39118	0.0148956
Q8EAZ1	Lipid A biosynthesis lauroyltransferase OS=Shewanella oneidensis (strain MR-1) OX=211586 GN=lpxL PE=3 SV=1	2.1353	1.07277	3.19782	0.0100136
Q8EHT0	Zn-dependent peptidase M48 family OS=Shewanella oneidensis (strain MR-1) OX=211586 GN=SO_1137 PE=3 SV=1	2.13496	0.438199	3.83171	0.0477386
Q8EH95	Prolipoprotein diacylglyceryl transferase OS=Shewanella oneidensis (strain MR-1) OX=211586 GN=lgt PE=3 SV=1	2.13417	0.8576	3.41074	0.0159996
Q8EIK9	Periplasmic alkaline phosphatase PhoA OS=Shewanella oneidensis (strain MR-1) OX=211586 GN=phoA PE=3 SV=1	2.13243	0.540473	3.72439	0.0373169
Q8EAW1	ABC-type cysteine/glutathione export system bifunctional ATPase and permease components CydD OS=Shewanella oneidensis (strain MR-1) OX=211586 GN=cydD PE=4 SV=1	2.12755	0.942337	3.31277	0.0129733
Q8ECN3	Thiophosphate efflux pump permease component OS=Shewanella oneidensis (strain MR-1) OX=211586 GN=SO_3103 PE=3 SV=1	2.12605	1.06473	3.18737	0.0100136
K4PSX0	MSHA biogenesis protein MshI1 OS=Shewanella oneidensis (strain MR-1) OX=211586 GN=mshI1 PE=4 SV=1	2.12338	0.398333	3.84843	0.0502273
Q8EAY0	Predicted lipoprotein OS=Shewanella oneidensis (strain MR-1) OX=211586 GN=SO_3761 PE=4 SV=1	2.11699	0.90067	3.3333	0.0141155
Q8ECM4	SecDF preprotein translocase-associated protein YajC OS=Shewanella oneidensis (strain MR-1) OX=211586 GN=yajC PE=4 SV=1	2.11598	0.96538	3.26657	0.01224
Q8EH60	ABC-type lipopolysaccharide export system permease component 2 LptG OS=Shewanella oneidensis (strain MR-1) OX=211586 GN=lptG PE=4 SV=1	2.11517	0.838071	3.39228	0.0167092
Q8EKG3	Extracellular metalloprotease PrtV OS=Shewanella oneidensis (strain MR-1) OX=211586 GN=prtV PE=4 SV=1	2.11332	0.716781	3.50986	0.0236887
Q8EDL0	Uncharacterized protein OS=Shewanella oneidensis (strain MR-1) OX=211586 GN=SO_2736 PE=4 SV=1	2.11227	0.899277	3.32526	0.0141155
Q8E9G2	Pal-like T1SS-linked outer membrane lipoprotein OS=Shewanella oneidensis (strain MR-1) OX=211586 GN=SO_4321 PE=3 SV=1	2.10563	0.372875	3.83838	0.0523522
Q8EBJ4	Type IV pilus biogenesis protein FimU OS=Shewanella oneidensis (strain MR-1) OX=211586 GN=fimU PE=4 SV=1	2.09577	0.418455	3.77309	0.0501431
Q8EA56	Methyl-accepting chemotaxis protein OS=Shewanella oneidensis (strain MR-1) OX=211586 GN=SO_4053 PE=4 SV=1	2.09247	0.643528	3.54142	0.027918
Q8EIE0	Na(+)-translocating NADH-quinone reductase subunit A OS=Shewanella oneidensis (strain MR-1) OX=211586 GN=nqrA PE=3 SV=1	2.0856	0.790021	3.38117	0.0191008
Q8EHF2	Spermidine/putrescine import ATP-binding protein PotA OS=Shewanella oneidensis (strain MR-1) OX=211586 GN=potG PE=3 SV=1	2.08143	1.07275	3.09011	0.0094081
Q8EAD2	Uncharacterized protein OS=Shewanella oneidensis (strain MR-1) OX=211586 GN=SO_3974 PE=4 SV=1	2.08065	0.674567	3.48674	0.0269659
Q8EGL2	Uncharacterized protein OS=Shewanella oneidensis (strain MR-1) OX=211586 GN=SO_1589 PE=4 SV=1	2.0641	0.230044	3.89815	0.0685435
Q8EAG0	Periplasmic serine endoprotease DegP-like OS=Shewanella oneidensis (strain MR-1) OX=211586 GN=degQ PE=3 SV=1	2.06258	0.705344	3.41982	0.023374
Q8E8S7	Cell division protein FtsX OS=Shewanella oneidensis (strain MR-1) OX=211586 GN=ftsX PE=3 SV=1	2.05764	0.90359	3.21169	0.0133797
Q8EKD0	T2aSS secretion system protein GspC OS=Shewanella oneidensis (strain MR-1) OX=211586 GN=gspC PE=4 SV=1	2.0418	0.84413	3.23948	0.0148956
Q8EAJ6	Uncharacterized protein OS=Shewanella oneidensis (strain MR-1) OX=211586 GN=SO_3906 PE=4 SV=1	2.04114	0.736544	3.34573	0.0211543
Q8EGW5	Outer membrane protein assembly factor BamE OS=Shewanella oneidensis (strain MR-1) OX=211586 GN=bamE PE=3 SV=1	2.04097	0.684835	3.3971	0.0254871
Q8EFQ6	Putative chaperone for general secretion pathway YbaY OS=Shewanella oneidensis (strain MR-1) OX=211586 GN=ybaY PE=4 SV=2	2.03782	0.682832	3.39281	0.0243231
Q8EDF2	UPF0434 protein SO_2800 OS=Shewanella oneidensis (strain MR-1) OX=211586 GN=SO_2800 PE=3 SV=1	2.03572	0.526868	3.54456	0.0375261
Q8EAT0	Peptidyl-prolyl cis-trans isomerase OS=Shewanella oneidensis (strain MR-1) OX=211586 GN=ppiA PE=3 SV=1	2.03103	0.308567	3.75349	0.0596351
Q8EA90	Putative lipoprotein OS=Shewanella oneidensis (strain MR-1) OX=211586 GN=SO_4018 PE=4 SV=1	2.03046	0.229355	3.83157	0.0688974
Q8EID5	Na(+)-translocating NADH-quinone reductase subunit F OS=Shewanella oneidensis (strain MR-1) OX=211586 GN=nqrF PE=3 SV=1	2.01744	0.978975	3.0559	0.0105407
K4PW03	Phosphatidylserine decarboxylase proenzyme OS=Shewanella oneidensis (strain MR-1) OX=211586 GN=psd PE=3 SV=1	2.01612	0.741589	3.29065	0.0204136
Q8ECR6	Cell divison protein DedD OS=Shewanella oneidensis (strain MR-1) OX=211586 GN=dedD PE=4 SV=1	1.99963	0.832438	3.16683	0.014699
Q8EEW5	Putative lipoprotein OS=Shewanella oneidensis (strain MR-1) OX=211586 GN=SO_2247 PE=4 SV=1	1.99776	0.759333	3.23619	0.0189265
Q8EE20	DUF885 family lipoprotein OS=Shewanella oneidensis (strain MR-1) OX=211586 GN=SO_2570 PE=1 SV=1	1.98845	0.806759	3.17013	0.0156255
Q8ECT0	Methyl-accepting chemotaxis protein OS=Shewanella oneidensis (strain MR-1) OX=211586 GN=SO_3052 PE=4 SV=1	1.98757	0.389087	3.58605	0.0498064
Q8EBB5	TPR repeat-containing protein OS=Shewanella oneidensis (strain MR-1) OX=211586 GN=SO_3615 PE=4 SV=1	1.98026	0.89089	3.06963	0.0126019
Q8EFC1	Uncharacterized protein OS=Shewanella oneidensis (strain MR-1) OX=211586 GN=SO_2062 PE=4 SV=1	1.97485	-0.658316	4.60801	0.193874
Q8EIW0	TonB-dependent hemoprotein receptor OS=Shewanella oneidensis (strain MR-1) OX=211586 GN=SO_0719 PE=3 SV=1	1.97031	0.738673	3.20195	0.0196323
Q8EH40	Peptidyl-prolyl cis-trans isomerase OS=Shewanella oneidensis (strain MR-1) OX=211586 GN=fklB PE=3 SV=1	1.961	0.81182	3.11018	0.014865
Q8EHL8	Preprotein translocase subunit SecG OS=Shewanella oneidensis (strain MR-1) OX=211586 GN=secG PE=4 SV=1	1.95863	0.247121	3.67014	0.0660025
Q8ECP0	Uncharacterized protein OS=Shewanella oneidensis (strain MR-1) OX=211586 GN=batD PE=4 SV=1	1.95844	0.936797	2.98008	0.0108124
Q8EJ40	Penicillin-binding protein 1B OS=Shewanella oneidensis (strain MR-1) OX=211586 GN=mrcB PE=3 SV=1	1.95818	0.68269	3.23367	0.0224886
Q8EBH7	Peptidase M28D family OS=Shewanella oneidensis (strain MR-1) OX=211586 GN=SO_3539 PE=4 SV=2	1.95604	0.719983	3.1921	0.0204136
Q8E9Z9	MSHA biogenesis protein MshN OS=Shewanella oneidensis (strain MR-1) OX=211586 GN=mshN PE=4 SV=1	1.94374	0.250601	3.63688	0.0652892
Q8E8H2	Efflux pump membrane transporter OS=Shewanella oneidensis (strain MR-1) OX=211586 GN=vmeB PE=3 SV=1	1.94073	0.862326	3.01914	0.0129144
Q8EE33	TIGR03503 family protein OS=Shewanella oneidensis (strain MR-1) OX=211586 GN=SO_2557 PE=4 SV=2	1.93741	0.192954	3.68186	0.0719032
Q8E9R2	Sec-independent protein translocase protein TatC OS=Shewanella oneidensis (strain MR-1) OX=211586 GN=tatC PE=3 SV=1	1.93067	0.718585	3.14275	0.0200675
Q8EI72	Disulphide interchange protein DsbD family OS=Shewanella oneidensis (strain MR-1) OX=211586 GN=SO_0975 PE=4 SV=1	1.92622	0.805355	3.04709	0.0145725
Q8ECE6	Phospholipid transport-associated protein MlaA OS=Shewanella oneidensis (strain MR-1) OX=211586 GN=mlaA PE=4 SV=1	1.91415	0.340548	3.48776	0.0522488
Q8ECN4	Thiophosphate efflux pump MFP component OS=Shewanella oneidensis (strain MR-1) OX=211586 GN=SO_3102 PE=3 SV=1	1.90862	0.0952342	3.722	0.0839382
Q8EHV9	Na(+)-translocating NADH-quinone reductase subunit A OS=Shewanella oneidensis (strain MR-1) OX=211586 GN=nqrA PE=3 SV=1	1.89228	0.696842	3.08772	0.0204136
Q8EEI1	Integration host factor subunit beta OS=Shewanella oneidensis (strain MR-1) OX=211586 GN=ihfB PE=3 SV=1	1.88787	-0.688203	4.46395	0.190861
Q8ECG4	Polysaccharide deacetylase OS=Shewanella oneidensis (strain MR-1) OX=211586 GN=SO_3178 PE=4 SV=1	1.88581	0.81797	2.95364	0.0136418
Q8E9R4	Sec-independent protein translocase protein TatA OS=Shewanella oneidensis (strain MR-1) OX=211586 GN=tatA PE=3 SV=1	1.88383	0.347675	3.41998	0.0508207
Q8EHV7	Na(+)-translocating NADH-quinone reductase subunit C OS=Shewanella oneidensis (strain MR-1) OX=211586 GN=nqrC PE=3 SV=1	1.88328	0.79519	2.97138	0.0144543
Q8EBF3	Bifunctional 2,3-cyclic-nucleotide 2-phosphodiesterase/3`-nucleotidase CpdB OS=Shewanella oneidensis (strain MR-1) OX=211586 GN=cpdB PE=3 SV=1	1.87937	0.562943	3.1958	0.0292622
Q8ED36	Extracellular lipase Pla-1/cef family OS=Shewanella oneidensis (strain MR-1) OX=211586 GN=SO_2934 PE=4 SV=1	1.87928	0.435795	3.32276	0.0414693
Q8EBR7	Lipoprotein NlpD OS=Shewanella oneidensis (strain MR-1) OX=211586 GN=nlpD PE=4 SV=1	1.87532	0.105365	3.64528	0.0826813
Q8E8H1	Proton-coupled multidrug efflux pump MFP component VmeA OS=Shewanella oneidensis (strain MR-1) OX=211586 GN=vmeA PE=3 SV=1	1.87241	0.753749	2.99107	0.0159343
Q8ED44	Putative ABC-type fatty acid export system permease component YbbP OS=Shewanella oneidensis (strain MR-1) OX=211586 GN=ybbP PE=4 SV=1	1.86202	0.668129	3.05591	0.0212975
Q8EAE6	ABC-type lipopolysaccharide export system ATPase component LptB OS=Shewanella oneidensis (strain MR-1) OX=211586 GN=lptB PE=4 SV=1	1.85544	0.615859	3.09502	0.0247773
Q8EKH4	Uncharacterized protein OS=Shewanella oneidensis (strain MR-1) OX=211586 GN=SO_0119 PE=4 SV=1	1.84328	0.610442	3.07612	0.0260537
Q8E9Y9	Protein with C-terminal FimV core domain OS=Shewanella oneidensis (strain MR-1) OX=211586 GN=SO_4121 PE=4 SV=1	1.84294	0.119364	3.56652	0.0805526
Q8EGR6	Stator-force generator of Na+ coupled flagellar motor PomA OS=Shewanella oneidensis (strain MR-1) OX=211586 GN=pomA PE=4 SV=1	1.84218	0.7568	2.92755	0.0150328
Q8ED08	Lambda phage major capsid protein OS=Shewanella oneidensis (strain MR-1) OX=211586 GN=SO_2963 PE=4 SV=1	1.83735	0.617286	3.05741	0.024266
Q8EGG7	Outer membrane protein assembly factor BamA OS=Shewanella oneidensis (strain MR-1) OX=211586 GN=bamA PE=3 SV=2	1.83574	0.476025	3.19546	0.0362388
Q8EJU5	Predicted inner membrane protein OS=Shewanella oneidensis (strain MR-1) OX=211586 GN=SO_0362 PE=4 SV=2	1.83514	0.643495	3.02679	0.0222176
Q8EEQ7	Ecotin OS=Shewanella oneidensis (strain MR-1) OX=211586 GN=eco PE=3 SV=1	1.83456	0.0247206	3.6444	0.0926242
Q8EG58	ABC-type transport system bifunctional permease and peptidase M1 family component OS=Shewanella oneidensis (strain MR-1) OX=211586 GN=SO_1751 PE=4 SV=1	1.83283	0.67253	2.99313	0.0204136
Q8EG09	ABC-type peptide uptake system substrate-binding component SapA OS=Shewanella oneidensis (strain MR-1) OX=211586 GN=sapA PE=4 SV=2	1.81581	0.399787	3.23184	0.0448654
Q8ECH0	Galactosyl transferase WbfU OS=Shewanella oneidensis (strain MR-1) OX=211586 GN=wbfU PE=4 SV=1	1.81132	0.720765	2.90187	0.0164819
Q8E821	Transcriptional regulator Winged helix family OS=Shewanella oneidensis (strain MR-1) OX=211586 GN=SO_A0132 PE=4 SV=1	1.81095	0.758792	2.8631	0.014522
Q8E8R2	Ribonuclease T2 OS=Shewanella oneidensis (strain MR-1) OX=211586 GN=SO_4599 PE=3 SV=1	1.78892	0.332847	3.245	0.0514692
Q8E924	Predicted periplasmic protein OS=Shewanella oneidensis (strain MR-1) OX=211586 GN=SO_4470 PE=4 SV=1	1.78724	0.578496	2.99599	0.0259715
Q8E8J8	Diheme cytochrome c4 CytcB OS=Shewanella oneidensis (strain MR-1) OX=211586 GN=cytcB PE=4 SV=1	1.76934	0.294283	3.2444	0.0547581
Q8EA12	Cell wall structural complex component MreC OS=Shewanella oneidensis (strain MR-1) OX=211586 GN=mreC PE=4 SV=1	1.76073	0.414497	3.10697	0.0420696
Q8E9J4	FAD:protein FMN transferase OS=Shewanella oneidensis (strain MR-1) OX=211586 GN=SO_4283 PE=3 SV=2	1.75297	0.0765539	3.42938	0.0849332
Q8EF19	LD-transpeptidase ErfK/YbiS/YcfS/YnhG family OS=Shewanella oneidensis (strain MR-1) OX=211586 GN=SO_2183 PE=4 SV=1	1.751	-0.203501	3.7055	0.127413
Q8EC56	Membrane-bound lytic murein transglycosylase F OS=Shewanella oneidensis (strain MR-1) OX=211586 GN=mltF PE=3 SV=2	1.74527	0.262722	3.22782	0.0587081
Q8CVD5	Azurin OS=Shewanella oneidensis (strain MR-1) OX=211586 GN=azu PE=4 SV=1	1.74319	-0.537083	4.02346	0.18352
Q8EDL7	Cytochrome b OS=Shewanella oneidensis (strain MR-1) OX=211586 GN=SO_2726 PE=4 SV=1	1.74171	0.292478	3.19094	0.0553574
Q8EKH2	Small conductance mechanosensitive ion channel protein YbdG OS=Shewanella oneidensis (strain MR-1) OX=211586 GN=ybdG PE=4 SV=2	1.7396	0.718641	2.76056	0.0148956
Q8EEM5	Uncharacterized protein OS=Shewanella oneidensis (strain MR-1) OX=211586 GN=SO_2353 PE=4 SV=1	1.73539	-0.0170395	3.48782	0.0979784
Q8EK23	Type IV pilus biogenesis protein PilO OS=Shewanella oneidensis (strain MR-1) OX=211586 GN=pilO PE=4 SV=1	1.72358	-0.0590223	3.50618	0.104536
Q8EA95	TPR repeat domain protein OS=Shewanella oneidensis (strain MR-1) OX=211586 GN=SO_4013 PE=4 SV=1	1.71791	0.645554	2.79027	0.01953
Q8EAN5	ABC-type molybdate uptake system substrate-binding component ModA OS=Shewanella oneidensis (strain MR-1) OX=211586 GN=modA PE=4 SV=2	1.7163	0.38239	3.05021	0.0434582
Q8EAC3	Metal ion transporter MIT family OS=Shewanella oneidensis (strain MR-1) OX=211586 GN=SO_3984 PE=4 SV=1	1.71516	0.47002	2.96029	0.0350932
Q8EEY6	Subfamily S9C unassigned peptidase OS=Shewanella oneidensis (strain MR-1) OX=211586 GN=SO_2223 PE=4 SV=1	1.71286	0.622567	2.80316	0.0208721
Q8EK31	Uncharacterized protein OS=Shewanella oneidensis (strain MR-1) OX=211586 GN=SO_0273 PE=4 SV=1	1.70708	0.0257396	3.38842	0.0923788
Q8EK75	50S ribosomal protein L7/L12 OS=Shewanella oneidensis (strain MR-1) OX=211586 GN=rplL PE=3 SV=1	1.7053	-0.0788718	3.48947	0.108693
Q8EGS6	L-lactate dehydrogenase complex protein LldG OS=Shewanella oneidensis (strain MR-1) OX=211586 GN=lldG PE=4 SV=1	1.69857	0.654559	2.74258	0.0181824
Q8EKC1	Type II secretion system protein L OS=Shewanella oneidensis (strain MR-1) OX=211586 GN=gspL PE=3 SV=1	1.69458	0.532302	2.85685	0.0272188
Q8E8I8	3-deoxy-D-manno-octulosonic-acid (KDO) transferase KdtA OS=Shewanella oneidensis (strain MR-1) OX=211586 GN=kdtA PE=4 SV=1	1.69121	0.271092	3.11132	0.0569686
Q8EAW0	Major pilin structural protein V10-like protein OS=Shewanella oneidensis (strain MR-1) OX=211586 GN=SO_3781 PE=4 SV=1	1.68724	0.412587	2.9619	0.0390236
Q8EFF5	Adenylate kinase OS=Shewanella oneidensis (strain MR-1) OX=211586 GN=adk PE=3 SV=1	1.68619	-0.343139	3.71552	0.153472
Q8EFT4	HAE1 family efflux pump permease component OS=Shewanella oneidensis (strain MR-1) OX=211586 GN=SO_1882 PE=3 SV=1	1.6854	0.26499	3.10582	0.0573581
Q8ECG5	Formyltransferase domain protein OS=Shewanella oneidensis (strain MR-1) OX=211586 GN=SO_3177 PE=4 SV=1	1.68092	0.512018	2.84982	0.0282923
Q8ED93	Putative beta-barrel assembly-enhancing protease OS=Shewanella oneidensis (strain MR-1) OX=211586 GN=yfgC PE=3 SV=1	1.67049	0.292271	3.04871	0.0537438
Q8EFF9	Nucleoid-associated protein SO_2014 OS=Shewanella oneidensis (strain MR-1) OX=211586 GN=SO_2014 PE=3 SV=1	1.67027	-0.291358	3.63191	0.14166
Q8EFH1	Bifunctional UDP-sugar hydrolase/5-nucleotidase UshA OS=Shewanella oneidensis (strain MR-1) OX=211586 GN=ushA PE=3 SV=1	1.66668	0.342988	2.99036	0.0466797
Q8ED24	Lambda phage protein of known function OS=Shewanella oneidensis (strain MR-1) OX=211586 GN=SO_2947 PE=4 SV=1	1.66437	0.0317406	3.297	0.0914418
Q8EG59	ABC-type transport system ATPase component OS=Shewanella oneidensis (strain MR-1) OX=211586 GN=SO_1750 PE=4 SV=1	1.66429	0.518888	2.80968	0.0274143
Q8EDZ8	Dihydroorotate dehydrogenase (quinone) OS=Shewanella oneidensis (strain MR-1) OX=211586 GN=pyrD PE=3 SV=1	1.65816	0.00476296	3.31155	0.0943691
Q8E9Q9	7TM intracellular signalling protein with GGDEF domain OS=Shewanella oneidensis (strain MR-1) OX=211586 GN=SO_4207 PE=4 SV=1	1.65706	-0.40943	3.72354	0.162026
Q8EA61	Diheme cytochrome c4 OS=Shewanella oneidensis (strain MR-1) OX=211586 GN=SO_4048 PE=4 SV=1	1.64217	0.120218	3.16412	0.0783524
Q8E9E4	Putative transport protein with Tim44-like domain OS=Shewanella oneidensis (strain MR-1) OX=211586 GN=SO_4340 PE=4 SV=1	1.6322	-0.253917	3.51832	0.138661
Q8E919	Cadmium and zinc efflux pump FieF OS=Shewanella oneidensis (strain MR-1) OX=211586 GN=fieF PE=1 SV=1	1.63054	0.51145	2.74963	0.027251
Q8EFF2	NH(3)-dependent NAD(+) synthetase OS=Shewanella oneidensis (strain MR-1) OX=211586 GN=nadE PE=3 SV=1	1.62878	0.00928265	3.24827	0.0939019
Q8EIY1	Thiol:disulfide interchange protein DsbD OS=Shewanella oneidensis (strain MR-1) OX=211586 GN=dsbD PE=3 SV=1	1.62254	0.485195	2.75989	0.029307
Q8E9A5	Uncharacterized protein OS=Shewanella oneidensis (strain MR-1) OX=211586 GN=SO_4379 PE=4 SV=1	1.61827	0.338036	2.89851	0.0471329
Q8EE77	Electron transport complex subunit G OS=Shewanella oneidensis (strain MR-1) OX=211586 GN=rnfG PE=3 SV=1	1.61237	0.339799	2.88495	0.0454104
Q8EB04	Putative periplasmic protein OS=Shewanella oneidensis (strain MR-1) OX=211586 GN=SO_3733 PE=4 SV=1	1.60991	0.551959	2.66786	0.0233189
Q8CMJ0	Putative surface lipoprotein OS=Shewanella oneidensis (strain MR-1) OX=211586 GN=SO_A0112 PE=4 SV=1	1.60935	0.513811	2.7049	0.0265152
Q8EFK3	Putative periplasmic protein OS=Shewanella oneidensis (strain MR-1) OX=211586 GN=SO_1968 PE=4 SV=1	1.60711	-0.60415	3.81836	0.207714
Q8EJ63	Cytochrome b OS=Shewanella oneidensis (strain MR-1) OX=211586 GN=petB PE=3 SV=1	1.59428	-0.0545908	3.24314	0.105066
Q8EJ62	Ubiquinol-cytochrome c reductase cytochrome c1 subunit PetC OS=Shewanella oneidensis (strain MR-1) OX=211586 GN=petC PE=4 SV=1	1.59317	0.150018	3.03633	0.0719032
Q8E837	Methyl-accepting chemotaxis protein OS=Shewanella oneidensis (strain MR-1) OX=211586 GN=SO_A0106 PE=4 SV=1	1.58974	0.533346	2.64613	0.0243004
Q8EAE8	Lipopolysaccharide export system protein LptC OS=Shewanella oneidensis (strain MR-1) OX=211586 GN=lptC PE=3 SV=1	1.58023	0.24382	2.91665	0.0580126
Q8EBI9	Type IV minor pilin protein PilW OS=Shewanella oneidensis (strain MR-1) OX=211586 GN=pilW PE=4 SV=2	1.57499	0.221577	2.9284	0.0613539
Q8EG03	UPF0283 membrane protein SO_1811 OS=Shewanella oneidensis (strain MR-1) OX=211586 GN=SO_1811 PE=3 SV=1	1.5718	-0.375588	3.51918	0.162188
Q8EFW1	Outer membrane protein required for motility and nitrate resistance OS=Shewanella oneidensis (strain MR-1) OX=211586 GN=SO_1854 PE=4 SV=1	1.56969	0.254874	2.88451	0.0555679
Q8EBH4	D-xylulose 5-phosphate/D-fructose 6-phosphate phosphoketolase Xfp OS=Shewanella oneidensis (strain MR-1) OX=211586 GN=xfp PE=4 SV=1	1.5628	-1.01327	4.13888	0.272154
Q8EJY4	Uncharacterized protein OS=Shewanella oneidensis (strain MR-1) OX=211586 GN=SO_0322 PE=4 SV=1	1.5624	0.461455	2.66334	0.0299871
Q8EB87	Uncharacterized protein OS=Shewanella oneidensis (strain MR-1) OX=211586 GN=SO_3645 PE=4 SV=1	1.56145	-0.115488	3.23838	0.116047
Q8EBG1	Glycosyl hydrolase family 23 OS=Shewanella oneidensis (strain MR-1) OX=211586 GN=SO_3557 PE=4 SV=1	1.5593	-0.787781	3.90638	0.245486
Q8EG32	Extracellular respiratory system surface decaheme cytochrome c component MtrF OS=Shewanella oneidensis (strain MR-1) OX=211586 GN=mtrF PE=1 SV=1	1.55561	-1.10552	4.21675	0.299121
Q8E833	Putative surface lipoprotein OS=Shewanella oneidensis (strain MR-1) OX=211586 GN=SO_A0110 PE=4 SV=1	1.52629	0.362933	2.68965	0.0404303
Q8EEL8	Cbb3-type cytochrome c oxidase subunit OS=Shewanella oneidensis (strain MR-1) OX=211586 GN=ccoP PE=3 SV=1	1.51479	0.381064	2.64853	0.03757
Q8EBE2	Methyl-accepting chemotaxis sensory transducer with 4HB sensory domain OS=Shewanella oneidensis (strain MR-1) OX=211586 GN=SO_3582 PE=4 SV=1	1.5145	-0.24813	3.27713	0.14107
Q8ED07	ATP-dependent Clp protease proteolytic subunit OS=Shewanella oneidensis (strain MR-1) OX=211586 GN=SO_2964 PE=3 SV=1	1.49183	0.100754	2.8829	0.0788059
Q8EGN9	ABC-type phosphate uptake system substrate-binding component PstS OS=Shewanella oneidensis (strain MR-1) OX=211586 GN=pstS PE=4 SV=1	1.49089	-0.291116	3.2729	0.149125
Q8EFP2	Succinate dehydrogenase flavoprotein subunit OS=Shewanella oneidensis (strain MR-1) OX=211586 GN=sdhA PE=3 SV=1	1.48907	0.295311	2.68283	0.0479892
Q8CX36	Putative negative regulator of univalent cation permeability OS=Shewanella oneidensis (strain MR-1) OX=211586 GN=SO_4129 PE=4 SV=1	1.48725	0.472029	2.50248	0.0267839
Q8EK37	Cytochrome c synthetase cytochrome b containing quinol-haem oxidoreductase subunit CcmF OS=Shewanella oneidensis (strain MR-1) OX=211586 GN=ccmF PE=4 SV=1	1.48531	0.332231	2.63839	0.0433925
Q8E8Y5	Fnr-inducible formate dehydrogenase cytochrome b subunit FdhC OS=Shewanella oneidensis (strain MR-1) OX=211586 GN=fdhC PE=4 SV=1	1.4811	-0.183418	3.14562	0.130666
Q8EIC5	Acyl-homoserine lactone acylase AaiD OS=Shewanella oneidensis (strain MR-1) OX=211586 GN=aaiD PE=4 SV=1	1.476	-0.0187048	2.9707	0.0987034
Q8E8J3	Intramembrane protease rhomboid family GlpG OS=Shewanella oneidensis (strain MR-1) OX=211586 GN=glpG PE=4 SV=1	1.45494	-1.11275	4.02262	0.319049
Q8EA07	MshA minor pilin protein MshO OS=Shewanella oneidensis (strain MR-1) OX=211586 GN=mshO PE=4 SV=1	1.44339	-0.224746	3.11153	0.138661
Q8EGB6	Cu2+-exporting ATPase CopA OS=Shewanella oneidensis (strain MR-1) OX=211586 GN=copA PE=3 SV=1	1.44159	0.0642682	2.81891	0.0842866
Q8EFM2	Glutamate/aspartate:proton symporter GltP OS=Shewanella oneidensis (strain MR-1) OX=211586 GN=gltP PE=3 SV=1	1.43377	0.374628	2.49291	0.0360267
Q8EBX5	UPF0312 protein SO_3370 OS=Shewanella oneidensis (strain MR-1) OX=211586 GN=SO_3370 PE=3 SV=1	1.42692	0.0378851	2.81596	0.0895882
Q8EIY2	Potassium efflux protein CPA2 family OS=Shewanella oneidensis (strain MR-1) OX=211586 GN=SO_0695 PE=3 SV=1	1.42459	0.177669	2.67151	0.064538
Q8ECY3	Lambda phage phage regulatory protein CII OS=Shewanella oneidensis (strain MR-1) OX=211586 GN=cII PE=4 SV=1	1.41895	0.259766	2.57813	0.0511437
Q8E9P2	Peptidoglycan D,D-transpeptidase FtsI OS=Shewanella oneidensis (strain MR-1) OX=211586 GN=ftsI PE=3 SV=1	1.41402	-0.27099	3.09903	0.148579
Q8EI09	ABC-type arginine uptakesystem substrate-binding component ArtI OS=Shewanella oneidensis (strain MR-1) OX=211586 GN=artI PE=3 SV=1	1.41064	-0.336263	3.15754	0.162183
Q8ECL5	Serine/threonine transporter SstT OS=Shewanella oneidensis (strain MR-1) OX=211586 GN=sstT PE=3 SV=1	1.40502	0.109263	2.70077	0.0765679
Q8EI62	Methyl accepting sensory transducer with Cache_2 small molecule binding domain OS=Shewanella oneidensis (strain MR-1) OX=211586 GN=SO_0987 PE=4 SV=1	1.40408	0.29701	2.51114	0.0453025
Q8ECP2	VWR domain protein in aerotolerance operon BatA OS=Shewanella oneidensis (strain MR-1) OX=211586 GN=batA PE=4 SV=1	1.3942	-0.270335	3.05874	0.148847
Q8E8K3	Uncharacterized protein OS=Shewanella oneidensis (strain MR-1) OX=211586 GN=SO_4661 PE=4 SV=1	1.38646	0.28296	2.48996	0.0470613
Q8EA04	MSHA major pilin subunit MshA OS=Shewanella oneidensis (strain MR-1) OX=211586 GN=mshA PE=4 SV=1	1.38099	0.30767	2.4543	0.0434582
Q8E8C9	Cbb3-type cytochrome oxidase assembly protein CcoG OS=Shewanella oneidensis (strain MR-1) OX=211586 GN=ccoG PE=4 SV=1	1.37293	0.341539	2.40432	0.0381271
Q8EK43	Heme exporter protein D OS=Shewanella oneidensis (strain MR-1) OX=211586 GN=ccmD PE=3 SV=1	1.37267	-0.170698	2.91604	0.130666
Q8EJ64	Ubiquinol-cytochrome c reductase iron-sulfur subunit OS=Shewanella oneidensis (strain MR-1) OX=211586 GN=petA PE=4 SV=1	1.37256	0.216893	2.52823	0.0566253
Q8EBZ7	Ferrochelatase 2 OS=Shewanella oneidensis (strain MR-1) OX=211586 GN=hemH2 PE=3 SV=1	1.37165	0.218337	2.52497	0.0563801
Q8EG11	ABC-type peptide uptake system permease component 2 SapC OS=Shewanella oneidensis (strain MR-1) OX=211586 GN=sapC PE=3 SV=1	1.36329	-0.317099	3.04368	0.160667
Q8E9I5	ABC-type phosphate uptake system substrate-binding component PstS OS=Shewanella oneidensis (strain MR-1) OX=211586 GN=pstS PE=4 SV=1	1.35739	-0.832289	3.54708	0.27195
Q8EDY5	Multivalent adhesion molecule 7 OS=Shewanella oneidensis (strain MR-1) OX=211586 GN=SO_2606 PE=4 SV=2	1.35204	0.270003	2.43407	0.0477386
Q8E881	Uncharacterized protein OS=Shewanella oneidensis (strain MR-1) OX=211586 GN=SO_A0042 PE=4 SV=1	1.3443	0.0142368	2.67436	0.0927152
Q8CX37	Putative negative regulator of univalent cation permeability OS=Shewanella oneidensis (strain MR-1) OX=211586 GN=SO_4128 PE=4 SV=1	1.33862	0.293127	2.38411	0.0441763
Q8E807	Copper/silver efflux pump MFP component CusB OS=Shewanella oneidensis (strain MR-1) OX=211586 GN=cusB PE=3 SV=2	1.31121	0.235343	2.38707	0.0518894
Q8EK44	Cytochrome c-type biogenesis protein CcmE OS=Shewanella oneidensis (strain MR-1) OX=211586 GN=ccmE PE=1 SV=1	1.30815	-0.0876359	2.70393	0.11527
Q8EDH0	Phosphate acyltransferase OS=Shewanella oneidensis (strain MR-1) OX=211586 GN=plsX PE=3 SV=1	1.30749	0.0795089	2.53547	0.0810606
Q8EJQ8	Zinc dependent metalloprotease domain lipoprotein OS=Shewanella oneidensis (strain MR-1) OX=211586 GN=SO_0404 PE=4 SV=1	1.30494	0.247136	2.36274	0.0499047
Q8EER5	Thioredoxin reductase OS=Shewanella oneidensis (strain MR-1) OX=211586 GN=trxB PE=3 SV=1	1.30486	-0.63052	3.24024	0.239442
Q8EB99	Co-chaperone protein DjlA OS=Shewanella oneidensis (strain MR-1) OX=211586 GN=djlA PE=3 SV=1	1.30347	0.144299	2.46264	0.0683372
Q8E9F5	Uncharacterized protein OS=Shewanella oneidensis (strain MR-1) OX=211586 GN=SO_4329 PE=4 SV=1	1.29005	0.0636635	2.51644	0.0837252
Q8EKP0	Protein-export protein SecB OS=Shewanella oneidensis (strain MR-1) OX=211586 GN=secB PE=3 SV=1	1.28968	0.191081	2.38829	0.0583679
Q8EEA0	6-phosphogluconate dehydratase Edd OS=Shewanella oneidensis (strain MR-1) OX=211586 GN=edd PE=1 SV=1	1.2884	-1.28767	3.86448	0.358996
Q8EJE9	Heavy metal efflux pump secretin component CzcC family OS=Shewanella oneidensis (strain MR-1) OX=211586 GN=SO_0518 PE=4 SV=1	1.28024	-1.02024	3.58073	0.333563
Q8ECE9	Outer membrane polysaccharide export channel protein Wza OS=Shewanella oneidensis (strain MR-1) OX=211586 GN=wza PE=4 SV=1	1.27974	-0.155826	2.71531	0.130666
Q8EFE0	DNA recombination protein RmuC OS=Shewanella oneidensis (strain MR-1) OX=211586 GN=rmuC PE=4 SV=1	1.2758	-0.584793	3.1364	0.239442
Q8EAH2	30S ribosomal protein S6 OS=Shewanella oneidensis (strain MR-1) OX=211586 GN=rpsF PE=3 SV=1	1.27568	-0.551711	3.10306	0.229735
Q8EB96	LPS-assembly protein LptD OS=Shewanella oneidensis (strain MR-1) OX=211586 GN=lptD PE=3 SV=1	1.26511	-0.108267	2.63849	0.119946
Q8E9A7	MMPL family efflux pump permease component OS=Shewanella oneidensis (strain MR-1) OX=211586 GN=SO_4377 PE=4 SV=1	1.2602	-0.432016	2.95242	0.193874
Q8EG16	Histone-like DNA-binding protein HupB OS=Shewanella oneidensis (strain MR-1) OX=211586 GN=hupB PE=3 SV=1	1.25031	-1.32641	3.82703	0.3971
Q8EFP1	Succinate dehydrogenase iron-sulfur subunit OS=Shewanella oneidensis (strain MR-1) OX=211586 GN=sdhB PE=3 SV=1	1.22972	0.000351556	2.45909	0.0951438
Q8EDQ8	Mu phage major head subunit GpT OS=Shewanella oneidensis (strain MR-1) OX=211586 GN=gpT PE=4 SV=1	1.21505	0.088261	2.34183	0.0781768
Q8EIA0	Signalling protein with PAS and GGDEF domains OS=Shewanella oneidensis (strain MR-1) OX=211586 GN=SO_0943 PE=4 SV=1	1.19083	-0.0210814	2.40274	0.100272
Q8EA96	Predicted transmembrane protein OS=Shewanella oneidensis (strain MR-1) OX=211586 GN=SO_4012 PE=4 SV=2	1.18813	-0.257201	2.63347	0.157384
Q8ECP7	Fatty acid oxidation complex subunit alpha OS=Shewanella oneidensis (strain MR-1) OX=211586 GN=fadJ PE=3 SV=2	1.18302	0.0507589	2.31528	0.0846008
K4PW09	Protein with c-terminal DUF1078 domain OS=Shewanella oneidensis (strain MR-1) OX=211586 GN=SO_4782 PE=4 SV=1	1.1732	-0.789635	3.13604	0.295773
Q8EFD3	Uncharacterized protein OS=Shewanella oneidensis (strain MR-1) OX=211586 GN=SO_2048 PE=4 SV=1	1.1413	-0.0877224	2.37031	0.117481
Q8E9F6	RND-type multidrug/detergent efflux system MFP component VexB OS=Shewanella oneidensis (strain MR-1) OX=211586 GN=vexB PE=3 SV=1	1.14089	-0.0224034	2.30418	0.100821
Q8EHD0	T2aSS secretion system protein A GspA OS=Shewanella oneidensis (strain MR-1) OX=211586 GN=gspA PE=4 SV=1	1.14007	0.0764288	2.20371	0.0788059
Q8EBG5	Sulfate transporter SulP family OS=Shewanella oneidensis (strain MR-1) OX=211586 GN=SO_3553 PE=3 SV=1	1.12958	0.0788524	2.18032	0.0787033
Q8EGR5	Stator-force generator of Na+ coupled flagellar motor PomB OS=Shewanella oneidensis (strain MR-1) OX=211586 GN=pomB PE=4 SV=1	1.12752	-0.587239	2.84228	0.250433
Q8EKM1	Hydrolase alpha/beta hydrolase fold family OS=Shewanella oneidensis (strain MR-1) OX=211586 GN=SO_0071 PE=4 SV=1	1.12601	0.0708157	2.18119	0.0800882
Q8EDS3	Uncharacterized protein OS=Shewanella oneidensis (strain MR-1) OX=211586 GN=SO_2670 PE=4 SV=1	1.1216	-0.625204	2.86839	0.2667
Q8EHP4	Leucine--tRNA ligase OS=Shewanella oneidensis (strain MR-1) OX=211586 GN=leuS PE=3 SV=1	1.12132	-0.885679	3.12832	0.325647
Q8EDM8	Thiamine-regulated TonB-dependent receptor OS=Shewanella oneidensis (strain MR-1) OX=211586 GN=SO_2715 PE=3 SV=1	1.11421	-0.692008	2.92044	0.286036
Q8EGD0	Short chain dehydrogenase family protein OS=Shewanella oneidensis (strain MR-1) OX=211586 GN=SO_1674 PE=4 SV=1	1.1061	-0.132175	2.34438	0.130532
Q8E9V3	PilD processed protein OS=Shewanella oneidensis (strain MR-1) OX=211586 GN=SO_4159 PE=4 SV=1	1.10532	-0.311768	2.5224	0.177618
Q8EK34	Cytochrome c-type biogenesis thioredoxin OS=Shewanella oneidensis (strain MR-1) OX=211586 GN=SO_0269 PE=4 SV=1	1.09748	-0.184389	2.37935	0.143185
Q8EKA1	Bifunctional lysophospholipid transporter-2-acyl glycerophosphoethanolamine acyl transferase/acyl ACP synthetase OS=Shewanella oneidensis (strain MR-1) OX=211586 GN=SO_0194 PE=4 SV=1	1.09622	0.00383161	2.18861	0.0942893
K4PSP3	Peptide chain release factor 2 OS=Shewanella oneidensis (strain MR-1) OX=211586 GN=prfB PE=3 SV=1	1.09223	-0.866861	3.05133	0.319049
Q8EJ05	Mu phage uncharacterized protein OS=Shewanella oneidensis (strain MR-1) OX=211586 GN=SO_0670 PE=4 SV=1	1.091	-0.177204	2.35921	0.14166
Q8ECK9	ABC-type metal export system bifunctional ATPase and permease component OS=Shewanella oneidensis (strain MR-1) OX=211586 GN=SO_3128 PE=4 SV=1	1.08784	-0.0225926	2.19828	0.101082
Q8EGJ8	4-phosphopantetheinyl transferase PfaE OS=Shewanella oneidensis (strain MR-1) OX=211586 GN=pfaE PE=3 SV=1	1.0834	-3.00093	5.16774	0.658143
Q8ED37	Inner membrane anchored endopeptidase SohB OS=Shewanella oneidensis (strain MR-1) OX=211586 GN=sohB PE=4 SV=1	1.08211	-0.0130105	2.17722	0.0986711
Q8EKE3	Peptidase M14 carboxypeptidase A family OS=Shewanella oneidensis (strain MR-1) OX=211586 GN=SO_0152 PE=4 SV=2	1.07461	-0.640667	2.78988	0.273294
Q8EHV4	Na(+)-translocating NADH-quinone reductase subunit F OS=Shewanella oneidensis (strain MR-1) OX=211586 GN=nqrF PE=3 SV=1	1.07077	0.0495937	2.09195	0.084084
Q8EK42	Heme exporter protein C OS=Shewanella oneidensis (strain MR-1) OX=211586 GN=ccmC PE=3 SV=1	1.05733	-0.254738	2.3694	0.167444
Q8EDJ5	TolA energy-transducing system inner membrane component TolQ OS=Shewanella oneidensis (strain MR-1) OX=211586 GN=tolQ PE=3 SV=1	1.05174	-0.111673	2.21515	0.126325
Q8ECH9	Outer membrane lipoprotein NlpE OS=Shewanella oneidensis (strain MR-1) OX=211586 GN=nlpE PE=1 SV=1	1.05137	-0.585116	2.68786	0.266676
Q8EKR1	Potassium uptake protein TrkA OS=Shewanella oneidensis (strain MR-1) OX=211586 GN=trkA PE=4 SV=1	1.03907	-1.53701	3.61514	0.450444
Q8EAA6	Two component signal transduction system hybrid histidine kinase/response regulator with PAS sensory domain OS=Shewanella oneidensis (strain MR-1) OX=211586 GN=SO_4002 PE=4 SV=2	1.03443	-0.231243	2.3001	0.161706
Q8EII4	Hydroxyneurosporene synthase AttH OS=Shewanella oneidensis (strain MR-1) OX=211586 GN=attH PE=4 SV=1	1.0294	-1.27819	3.337	0.430319
Q8EG20	Trigger factor OS=Shewanella oneidensis (strain MR-1) OX=211586 GN=tig PE=3 SV=1	1.02865	-0.608026	2.66532	0.281214
Q8EIA1	Predicted membrane protein OS=Shewanella oneidensis (strain MR-1) OX=211586 GN=SO_0942 PE=4 SV=1	1.02716	-0.204954	2.25928	0.152369
Q8EKH0	Acyltransferase family protein OS=Shewanella oneidensis (strain MR-1) OX=211586 GN=SO_0123 PE=4 SV=1	1.02323	-0.772822	2.81929	0.317998
Q8E804	Uncharacterized protein OS=Shewanella oneidensis (strain MR-1) OX=211586 GN=SO_A0157 PE=4 SV=1	1.02269	-0.963197	3.00858	0.363969
Q8E9R7	Ubiquinone/menaquinone biosynthesis C-methyltransferase UbiE OS=Shewanella oneidensis (strain MR-1) OX=211586 GN=ubiE PE=3 SV=1	1.02158	-0.0113616	2.05452	0.0984933
Q8EK24	Type IV pilus biogenesis protein PilN OS=Shewanella oneidensis (strain MR-1) OX=211586 GN=pilN PE=4 SV=1	1.01939	-0.73857	2.77735	0.310307
Q8EJ08	Mu phage portal protein OS=Shewanella oneidensis (strain MR-1) OX=211586 GN=SO_0667 PE=4 SV=1	1.00878	-0.189185	2.20674	0.149749
Q8EA06	MshA minor pilin protein MshD OS=Shewanella oneidensis (strain MR-1) OX=211586 GN=mshD PE=4 SV=1	1.00822	-1.03632	3.05275	0.384454
Q8EJ80	Small conductance mechanosensitive ion channel protein MscS family OS=Shewanella oneidensis (strain MR-1) OX=211586 GN=SO_0588 PE=4 SV=1	0.997831	-0.0351595	2.03082	0.105276
Q8EFM9	Magnesium transport protein CorA OS=Shewanella oneidensis (strain MR-1) OX=211586 GN=corA PE=3 SV=1	0.997236	-0.35631	2.35078	0.20159
Q8EJ00	Mu phage major head subunit OS=Shewanella oneidensis (strain MR-1) OX=211586 GN=SO_0675 PE=4 SV=1	0.993537	-0.663003	2.65008	0.303347
Q8EJ61	Transcpriptional activator SspA OS=Shewanella oneidensis (strain MR-1) OX=211586 GN=sspA PE=3 SV=1	0.987162	-1.04962	3.02394	0.390745
Q8EE93	Peptidase family M2 OS=Shewanella oneidensis (strain MR-1) OX=211586 GN=SO_2494 PE=4 SV=1	0.985176	-0.041697	2.01205	0.107546
Q8EH05	Periplasmic decaheme cytochrome c DmsE OS=Shewanella oneidensis (strain MR-1) OX=211586 GN=dmsE PE=4 SV=1	0.984999	-0.826582	2.79658	0.339713
Q8EEG9	Ubiquinone biosynthesis O-methyltransferase OS=Shewanella oneidensis (strain MR-1) OX=211586 GN=ubiG PE=3 SV=1	0.981914	-0.152792	2.11662	0.141078
Q8EEV4	ABC-type lipoprotein release system permease component LolC OS=Shewanella oneidensis (strain MR-1) OX=211586 GN=lolC PE=4 SV=1	0.981732	-0.748928	2.71239	0.319049
Q8EAV0	Periplasmic Zn-dependent dipeptidase M19 family OS=Shewanella oneidensis (strain MR-1) OX=211586 GN=SO_3791 PE=4 SV=1	0.97287	-0.781485	2.72722	0.329745
Q8E8Z1	Formate dehydrogenase molybdopterin-binding subunit FdhA OS=Shewanella oneidensis (strain MR-1) OX=211586 GN=fdhA PE=3 SV=1	0.9716	-0.201232	2.14443	0.156102
Q8EDS0	Mu phage uncharacterized protein OS=Shewanella oneidensis (strain MR-1) OX=211586 GN=SO_2673 PE=4 SV=1	0.963533	-0.722224	2.64929	0.317067
Q8ECG7	Asparagine synthase glutamine-hydrolyzing WbpQ OS=Shewanella oneidensis (strain MR-1) OX=211586 GN=wbpQ PE=4 SV=1	0.959555	-0.104908	2.02402	0.127347
Q8EG83	Phosphate transport system permease protein PstA OS=Shewanella oneidensis (strain MR-1) OX=211586 GN=pstA PE=3 SV=1	0.954392	-0.750857	2.65964	0.32501
Q8EF15	Lipoprotein CreA OS=Shewanella oneidensis (strain MR-1) OX=211586 GN=creA PE=4 SV=1	0.943682	-0.250984	2.13835	0.175074
Q8EJA3	ABC-type zinc uptake system substrate-binding component ZnuA OS=Shewanella oneidensis (strain MR-1) OX=211586 GN=znuA PE=4 SV=1	0.93684	-0.352774	2.22645	0.207714
Q8EDZ6	MMPL family efflux pump OS=Shewanella oneidensis (strain MR-1) OX=211586 GN=SO_2594 PE=4 SV=1	0.933911	-0.379097	2.24692	0.216875
Q0KHM6	Uncharacterized protein OS=Shewanella oneidensis (strain MR-1) OX=211586 GN=SO_A0180 PE=4 SV=2	0.92908	-0.927545	2.78571	0.378461
K4PSX5	RND-type multidrug/detergent efflux system permease component VexA OS=Shewanella oneidensis (strain MR-1) OX=211586 GN=vexA PE=3 SV=1	0.927661	-0.381856	2.23718	0.222156
Q8EC62	Energy taxis modulating methyl accepting sensory transducer OS=Shewanella oneidensis (strain MR-1) OX=211586 GN=SO_3282 PE=4 SV=1	0.925504	-0.819605	2.67061	0.351686
Q8EJ01	Mu phage peptidase OS=Shewanella oneidensis (strain MR-1) OX=211586 GN=SO_0674 PE=4 SV=1	0.925445	-1.02186	2.87275	0.411349
Q8EIA3	Transmembrane transcriptional regulator OS=Shewanella oneidensis (strain MR-1) OX=211586 GN=SO_0940 PE=4 SV=1	0.921869	-0.742021	2.58576	0.329921
Q8EG28	Ferrous iron transport protein B OS=Shewanella oneidensis (strain MR-1) OX=211586 GN=feoB PE=3 SV=1	0.898581	-0.283021	2.08018	0.190861
Q8EIC4	Serine uptake transporter SdaC OS=Shewanella oneidensis (strain MR-1) OX=211586 GN=sdaC PE=4 SV=1	0.89532	-1.00107	2.79171	0.403216
Q8EKC2	Type II secretion system protein K OS=Shewanella oneidensis (strain MR-1) OX=211586 GN=gspK PE=3 SV=1	0.88845	-0.825145	2.60205	0.361266
Q8EHZ4	TIGR02722 family lipoprotein OS=Shewanella oneidensis (strain MR-1) OX=211586 GN=SO_1060 PE=4 SV=2	0.885916	-0.16273	1.93456	0.148847
Q8EBJ2	Type IV minor pilin protein PilE OS=Shewanella oneidensis (strain MR-1) OX=211586 GN=pilE PE=4 SV=1	0.881607	-0.822183	2.5854	0.361495
Q8ED18	Lambda phage tail length tape meausure protein H OS=Shewanella oneidensis (strain MR-1) OX=211586 GN=H PE=4 SV=1	0.876786	-0.257957	2.01153	0.184117
Q8EA03	MSHA minor pilin protein MshB OS=Shewanella oneidensis (strain MR-1) OX=211586 GN=mshB PE=4 SV=1	0.85638	-0.294778	2.00754	0.200161
Q8EC69	Putative periplasmic protein OS=Shewanella oneidensis (strain MR-1) OX=211586 GN=SO_3275 PE=4 SV=1	0.849441	-1.7395	3.43838	0.563783
Q8EFL9	Gamma-glutamyltransferase GgtA OS=Shewanella oneidensis (strain MR-1) OX=211586 GN=ggtA PE=4 SV=1	0.847605	-0.833367	2.52858	0.37468
Q8EHB9	TonB-dependent receptor OS=Shewanella oneidensis (strain MR-1) OX=211586 GN=SO_1309 PE=3 SV=1	0.840769	-1.33134	3.01288	0.506717
Q8ECN7	Outer membrane long-chain fatty acid receptor FadL family OS=Shewanella oneidensis (strain MR-1) OX=211586 GN=SO_3099 PE=4 SV=1	0.840242	-0.832533	2.51302	0.387239
Q8EBN8	Serine hydroxymethyltransferase OS=Shewanella oneidensis (strain MR-1) OX=211586 GN=glyA PE=3 SV=1	0.829276	-2.08035	3.7389	0.619173
Q8EH76	Uncharacterized protein OS=Shewanella oneidensis (strain MR-1) OX=211586 GN=SO_1353 PE=4 SV=1	0.824164	-1.29809	2.94642	0.480383
Q8EJL8	Putative negative regulator of univalent cation permeability OS=Shewanella oneidensis (strain MR-1) OX=211586 GN=SO_0445 PE=4 SV=1	0.811913	-0.275521	1.89935	0.1985
Q8E962	Two component signal transduction system histidine kinase OS=Shewanella oneidensis (strain MR-1) OX=211586 GN=SO_4427 PE=4 SV=1	0.809719	-0.495844	2.11528	0.283833
Q8EAH5	50S ribosomal protein L9 OS=Shewanella oneidensis (strain MR-1) OX=211586 GN=rplI PE=3 SV=1	0.80967	-1.35388	2.97322	0.522632
Q8EAZ6	NAD(P) transhydrogenase subunit beta OS=Shewanella oneidensis (strain MR-1) OX=211586 GN=pntB PE=3 SV=1	0.809553	-0.332604	1.95171	0.222117
Q8ED20	Lambda phage protein of known function OS=Shewanella oneidensis (strain MR-1) OX=211586 GN=SO_2951 PE=4 SV=1	0.804991	-0.487987	2.09797	0.285886
Q8EEM8	Aminotransferase OS=Shewanella oneidensis (strain MR-1) OX=211586 GN=aspC PE=3 SV=1	0.780876	-0.489257	2.05101	0.292122
Q8EH02	Extracellular dimethyl sulfoxide/manganese oxide reductase ferredoxin subunit DmsB OS=Shewanella oneidensis (strain MR-1) OX=211586 GN=dmsB PE=4 SV=1	0.777689	-0.436606	1.99198	0.27195
Q8EC91	Flagella basal body P-ring formation protein FlgA OS=Shewanella oneidensis (strain MR-1) OX=211586 GN=flgA PE=3 SV=1	0.769411	-1.33516	2.87399	0.510627
Q8EH59	RDD family protein OS=Shewanella oneidensis (strain MR-1) OX=211586 GN=SO_1371 PE=4 SV=1	0.766813	-1.43278	2.96641	0.531578
Q8EKF7	Uncharacterized protein OS=Shewanella oneidensis (strain MR-1) OX=211586 GN=SO_0136 PE=3 SV=1	0.764954	-0.95424	2.48415	0.438268
Q8EEQ9	Serine--tRNA ligase OS=Shewanella oneidensis (strain MR-1) OX=211586 GN=serS PE=3 SV=1	0.763737	-0.849076	2.37655	0.41286
Q8EAU2	Surface-associated serine protease OS=Shewanella oneidensis (strain MR-1) OX=211586 GN=SO_3800 PE=3 SV=1	0.762291	-0.362628	1.88721	0.244262
Q8EHZ0	WD-40 repeat lipoprotein OS=Shewanella oneidensis (strain MR-1) OX=211586 GN=SO_1064 PE=4 SV=1	0.760069	-0.558352	2.07849	0.317998
Q8E9D3	Hemolysin HlyA OS=Shewanella oneidensis (strain MR-1) OX=211586 GN=hlyA PE=4 SV=1	0.752507	-0.357388	1.8624	0.244251
Q8EDZ4	Uncharacterized protein OS=Shewanella oneidensis (strain MR-1) OX=211586 GN=SO_2596 PE=4 SV=1	0.752184	-0.477085	1.98145	0.290517
Q8EK50	Protein translocase subunit SecY OS=Shewanella oneidensis (strain MR-1) OX=211586 GN=secY PE=3 SV=1	0.750897	-0.495101	1.99689	0.301474
Q8EGA0	ABC-type drugE1 family efflux system MFP component OS=Shewanella oneidensis (strain MR-1) OX=211586 GN=SO_1705 PE=4 SV=2	0.729565	-0.631715	2.09084	0.357215
Q8EEI3	Lipopolysaccharide assembly protein B OS=Shewanella oneidensis (strain MR-1) OX=211586 GN=yciM PE=3 SV=1	0.722935	-0.607145	2.05302	0.351062
Q8E8R4	Copper/silver efflux pump MFP component CusB OS=Shewanella oneidensis (strain MR-1) OX=211586 GN=cusB PE=3 SV=2	0.717494	-0.661559	2.09655	0.371071
Q8EAF4	ABC-type phospholipid uptake (Salvage) system substrate-binding component MlaD OS=Shewanella oneidensis (strain MR-1) OX=211586 GN=mlaD PE=4 SV=1	0.714004	-0.354552	1.78256	0.250555
Q8E808	Copper/silver efflux pump permease component CusA OS=Shewanella oneidensis (strain MR-1) OX=211586 GN=cusA PE=3 SV=1	0.713467	-0.3286	1.75553	0.239827
Q8CX49	10 kDa chaperonin OS=Shewanella oneidensis (strain MR-1) OX=211586 GN=groS PE=3 SV=1	0.703335	-1.34901	2.75568	0.548508
Q8E8Z0	Formate dehydrogenase FeS subunit FdhB OS=Shewanella oneidensis (strain MR-1) OX=211586 GN=fdhB PE=4 SV=1	0.694112	-0.873561	2.26179	0.443433
Q8EIV5	Catalase-peroxidase 2 OS=Shewanella oneidensis (strain MR-1) OX=211586 GN=katG2 PE=3 SV=1	0.688597	-1.98018	3.35737	0.657339
Q8EDE1	Transporter-like protein HCC family OS=Shewanella oneidensis (strain MR-1) OX=211586 GN=SO_2815 PE=1 SV=1	0.687256	-1.59063	2.96514	0.587054
Q8ED73	Base-induced periplasmic protein YceI OS=Shewanella oneidensis (strain MR-1) OX=211586 GN=yceI PE=3 SV=1	0.684235	-0.698697	2.06717	0.388773
Q8EG39	D-glycerate transporter GrtP OS=Shewanella oneidensis (strain MR-1) OX=211586 GN=grtP PE=4 SV=1	0.683285	-1.47314	2.83971	0.567214
Q8E9B1	Glycosyl transferase family 2 OS=Shewanella oneidensis (strain MR-1) OX=211586 GN=SO_4373 PE=4 SV=2	0.683057	-0.40019	1.7663	0.279586
Q8EEU8	Iron-sulfur cluster assembly scaffold protein IscU OS=Shewanella oneidensis (strain MR-1) OX=211586 GN=iscU PE=3 SV=1	0.669027	-1.30037	2.63842	0.543955
Q8ECR4	Type IV pilus assembly protein FimV OS=Shewanella oneidensis (strain MR-1) OX=211586 GN=fimV PE=4 SV=1	0.665603	-0.615238	1.94644	0.371071
Q8EHV8	Na(+)-translocating NADH-quinone reductase subunit B OS=Shewanella oneidensis (strain MR-1) OX=211586 GN=nqrB PE=3 SV=1	0.664745	-0.443496	1.77299	0.303347
Q8E8Y6	Fnr-inducible formate dehydrogenase FeS subunit FdhB OS=Shewanella oneidensis (strain MR-1) OX=211586 GN=fdhB PE=4 SV=1	0.657476	-0.458175	1.77313	0.312285
Q8EHR7	Ribose-5-phosphate isomerase A OS=Shewanella oneidensis (strain MR-1) OX=211586 GN=rpiA PE=3 SV=1	0.652973	-1.52641	2.83235	0.589412
Q8EGQ6	Periplasmic peptidase family S9 OS=Shewanella oneidensis (strain MR-1) OX=211586 GN=SO_1539 PE=4 SV=2	0.642495	-0.455836	1.74083	0.316095
Q8E9R3	Sec-independent protein translocase protein TatB OS=Shewanella oneidensis (strain MR-1) OX=211586 GN=tatB PE=3 SV=1	0.640953	-1.05117	2.33307	0.503742
Q8EHS8	Peptidyl-prolyl cis-trans isomerase OS=Shewanella oneidensis (strain MR-1) OX=211586 GN=fklB PE=3 SV=1	0.638626	-1.6349	2.91215	0.632389
Q8E8P2	Fe/S biogenesis protein NfuA OS=Shewanella oneidensis (strain MR-1) OX=211586 GN=nfuA PE=3 SV=1	0.633079	-1.06758	2.33373	0.511461
Q8EEV3	Inositol-1-monophosphatase OS=Shewanella oneidensis (strain MR-1) OX=211586 GN=suhB PE=3 SV=1	0.625723	-0.774507	2.02595	0.436153
Q8EID8	Na(+)-translocating NADH-quinone reductase subunit C OS=Shewanella oneidensis (strain MR-1) OX=211586 GN=nqrC PE=1 SV=1	0.618035	-0.847253	2.08332	0.458828
Q8EAG6	Flagellar rotation associated protein MotX OS=Shewanella oneidensis (strain MR-1) OX=211586 GN=motX PE=4 SV=2	0.616893	-0.433657	1.66744	0.314121
Q8EJA1	1-acyl-sn-glycerol-3-phosphate acyltransferase OS=Shewanella oneidensis (strain MR-1) OX=211586 GN=plsC PE=3 SV=1	0.61551	-0.600404	1.83142	0.384311
Q8EEI8	D-alanyl-D-alanine carboxypeptidase DacB OS=Shewanella oneidensis (strain MR-1) OX=211586 GN=dacB PE=4 SV=1	0.612002	-1.15265	2.37665	0.543981
Q8EHK4	Deoxyribose-phosphate aldolase OS=Shewanella oneidensis (strain MR-1) OX=211586 GN=deoC PE=3 SV=1	0.611113	-1.96496	3.18719	0.666157
Q8EJV9	Phospholipid/glycerol acyltransferase family protein OS=Shewanella oneidensis (strain MR-1) OX=211586 GN=SO_0347 PE=4 SV=2	0.608914	-1.08338	2.30121	0.528109
Q8EIL9	ABC-type macrolide export systemMFP component MacA OS=Shewanella oneidensis (strain MR-1) OX=211586 GN=macA PE=3 SV=1	0.605476	-0.769807	1.98076	0.445453
K4PSH5	Peroxiredoxin TsaA OS=Shewanella oneidensis (strain MR-1) OX=211586 GN=tsaA PE=4 SV=1	0.604557	-0.624873	1.83399	0.395902
Q8EF13	Histidine kinase OS=Shewanella oneidensis (strain MR-1) OX=211586 GN=SO_2192 PE=4 SV=2	0.604403	-0.450599	1.6594	0.324548
Q8EFV0	ABC-type export system ATPase component OS=Shewanella oneidensis (strain MR-1) OX=211586 GN=SO_1865 PE=4 SV=1	0.596077	-0.666412	1.85857	0.410634
Q8E9G5	Type I protein secretion system bifunctional ATPase and permease component AggC OS=Shewanella oneidensis (strain MR-1) OX=211586 GN=aggC PE=4 SV=1	0.592718	-0.604582	1.79002	0.392239
Q8ECP6	3-ketoacyl-CoA thiolase OS=Shewanella oneidensis (strain MR-1) OX=211586 GN=fadI PE=3 SV=1	0.588103	-0.481647	1.65785	0.345761
Q8EEV1	Serine acetyltransferase CysE OS=Shewanella oneidensis (strain MR-1) OX=211586 GN=cysE PE=4 SV=1	0.585048	-0.427262	1.59736	0.31957
Q8EFN8	Succinate--CoA ligase [ADP-forming] subunit beta OS=Shewanella oneidensis (strain MR-1) OX=211586 GN=sucC PE=3 SV=1	0.582538	-0.79583	1.9609	0.46349
Q8EH03	Extracellular dimethyl sulfoxide/manganese oxide reductase molybdopterin-binding subunit DmsA OS=Shewanella oneidensis (strain MR-1) OX=211586 GN=dmsA PE=3 SV=1	0.582402	-0.556774	1.72158	0.37908
Q8ED23	Lambda phage tail assembly protein K OS=Shewanella oneidensis (strain MR-1) OX=211586 GN=K PE=4 SV=1	0.573469	-2.00261	3.14954	0.68489
Q8EAI2	Periplasmic [Fe-Fe] hydrogenase large subunit HydA OS=Shewanella oneidensis (strain MR-1) OX=211586 GN=hydA PE=4 SV=1	0.569555	-1.05149	2.1906	0.549435
Q8EBE7	Predicted periplasmic protein OS=Shewanella oneidensis (strain MR-1) OX=211586 GN=SO_3576 PE=4 SV=1	0.569177	-1.12743	2.26578	0.555782
Q8EGE5	Surface localized decaheme cytochrome c lipoprotein OS=Shewanella oneidensis (strain MR-1) OX=211586 GN=SO_1659 PE=4 SV=2	0.5668	-0.795393	1.92899	0.47021
Q8EI85	Probable cytosol aminopeptidase 1 OS=Shewanella oneidensis (strain MR-1) OX=211586 GN=pepA1 PE=3 SV=2	0.565979	-0.620739	1.7527	0.410681
Q8EEX1	Energy taxis modulating methyl accepting sensory transducer with Cache_2 sensory domain OS=Shewanella oneidensis (strain MR-1) OX=211586 GN=SO_2240 PE=4 SV=1	0.564047	-0.824632	1.95273	0.47593
Q8EJL9	Zinc/cadmium-responsive efflux pump OS=Shewanella oneidensis (strain MR-1) OX=211586 GN=SO_0444 PE=4 SV=1	0.547796	-0.659622	1.75521	0.434461
Q8ED60	ArgR-regulated TonB-dependent receptor OS=Shewanella oneidensis (strain MR-1) OX=211586 GN=SO_2907 PE=3 SV=1	0.543102	-1.40285	2.48905	0.638632
Q8EJN3	Uncharacterized protein OS=Shewanella oneidensis (strain MR-1) OX=211586 GN=SO_0430 PE=4 SV=1	0.542863	-1.23711	2.32283	0.591317
Q8EEP9	Elongation factor P OS=Shewanella oneidensis (strain MR-1) OX=211586 GN=efp PE=3 SV=1	0.542714	-1.70706	2.79248	0.677782
Q8EB69	ABC-type multidrug eflux system bifunctional ATPase and permease component OS=Shewanella oneidensis (strain MR-1) OX=211586 GN=SO_3665 PE=4 SV=1	0.540835	-0.63329	1.71496	0.42735
Q8EAU0	ABC-type DrugE1 family export system ATPase component OS=Shewanella oneidensis (strain MR-1) OX=211586 GN=SO_3802 PE=4 SV=1	0.534131	-0.919457	1.98772	0.530719
Q8E817	Uncharacterized protein OS=Shewanella oneidensis (strain MR-1) OX=211586 GN=SO_A0139 PE=4 SV=2	0.527256	-0.555259	1.60977	0.400039
Q8E9J0	Stator-force generator of H+ coupled flagellar motor MotA OS=Shewanella oneidensis (strain MR-1) OX=211586 GN=motA PE=3 SV=1	0.523811	-0.741636	1.78926	0.472747
Q8EKI9	Nitrate-inducible formate dehydrogenase cytochrome b subunit FdnI OS=Shewanella oneidensis (strain MR-1) OX=211586 GN=fdnI PE=4 SV=1	0.520017	-1.64243	2.68246	0.678072
Q8ED31	Lambda phage tail fiber protein J OS=Shewanella oneidensis (strain MR-1) OX=211586 GN=J PE=4 SV=1	0.517076	-0.570581	1.60473	0.411349
Q8EG33	Extracelllular iron oxide respiratory system surface decaheme cytochrome c component OmcA OS=Shewanella oneidensis (strain MR-1) OX=211586 GN=omcA PE=1 SV=1	0.515125	-0.63681	1.66706	0.440112
Q8E921	Autotransporter OS=Shewanella oneidensis (strain MR-1) OX=211586 GN=SO_4473 PE=4 SV=1	0.497565	-1.94868	2.94381	0.73195
K4PU14	Proton:peptide symporter POT family OS=Shewanella oneidensis (strain MR-1) OX=211586 GN=SO_3195 PE=4 SV=1	0.491965	-0.904474	1.8884	0.548508
Q8EGS4	L-lactate dehydrogenase complex protein LldE OS=Shewanella oneidensis (strain MR-1) OX=211586 GN=lldE PE=4 SV=1	0.486893	-0.567496	1.54128	0.426288
Q8ECE3	Uncharacterized protein OS=Shewanella oneidensis (strain MR-1) OX=211586 GN=SO_3200 PE=4 SV=1	0.485835	-1.25068	2.22235	0.633677
Q8E9X8	Uncharacterized protein OS=Shewanella oneidensis (strain MR-1) OX=211586 GN=SO_4134 PE=4 SV=1	0.483548	-1.67226	2.63936	0.699049
Q8EDW2	Isocitrate dehydrogenase NADP-dependent Icd OS=Shewanella oneidensis (strain MR-1) OX=211586 GN=icd PE=4 SV=1	0.482874	-1.03433	2.00008	0.587054
Q8EKJ0	Nitrate-inducible formate dehydrogenase iron-sulfur subunit FdnH OS=Shewanella oneidensis (strain MR-1) OX=211586 GN=fdnH PE=4 SV=1	0.478621	-0.607354	1.5646	0.445265
Q8ED22	Lambda phage minor tail protein L OS=Shewanella oneidensis (strain MR-1) OX=211586 GN=L PE=4 SV=1	0.47465	-0.62398	1.57328	0.45248
Q8ECE1	Chemotaxis signal transduction system adaptor protein CheW OS=Shewanella oneidensis (strain MR-1) OX=211586 GN=cheW PE=4 SV=1	0.470893	-0.985069	1.92685	0.567645
Q8EKM2	ABC-type sodium efflux system ATPase component NatA OS=Shewanella oneidensis (strain MR-1) OX=211586 GN=natA PE=4 SV=1	0.468819	-0.774553	1.71219	0.512144
Q8ED43	Putative ABC-type fatty acid export system ATPase component YbbA OS=Shewanella oneidensis (strain MR-1) OX=211586 GN=ybbA PE=4 SV=1	0.467508	-1.35844	2.29345	0.659559
Q8EEE9	Aspartate--tRNA ligase OS=Shewanella oneidensis (strain MR-1) OX=211586 GN=aspS PE=3 SV=1	0.460147	-0.900808	1.8211	0.563783
Q8EKM6	YfhM family alpha2-macroglobulin OS=Shewanella oneidensis (strain MR-1) OX=211586 GN=SO_0066 PE=4 SV=1	0.456663	-0.593665	1.50699	0.450444
K4PW10	PqiA family protein OS=Shewanella oneidensis (strain MR-1) OX=211586 GN=SO_4786 PE=4 SV=1	0.446271	-2.176	3.06854	0.769949
Q8E8Y7	Fnr-inducilble formate dehydrogenase molybdopterin-binding subunit FdhA OS=Shewanella oneidensis (strain MR-1) OX=211586 GN=fdhA PE=3 SV=1	0.441688	-0.752451	1.63583	0.528109
Q8EA32	TonB-dependent receptor OS=Shewanella oneidensis (strain MR-1) OX=211586 GN=SO_4077 PE=3 SV=1	0.436017	-3.35319	4.22523	0.862494
Q8EG72	Uncharacterized protein OS=Shewanella oneidensis (strain MR-1) OX=211586 GN=SO_1736 PE=4 SV=1	0.433914	-1.39685	2.26467	0.683506
Q8E9T5	Membrane anchored protein MxdC OS=Shewanella oneidensis (strain MR-1) OX=211586 GN=mxdC PE=4 SV=1	0.429467	-1.35158	2.21052	0.677782
Q8EDM0	Purine nucleoside phosphoramidase HinT OS=Shewanella oneidensis (strain MR-1) OX=211586 GN=hinT PE=4 SV=1	0.42785	-1.53623	2.39193	0.700476
Q8EEN2	Uncharacterized protein OS=Shewanella oneidensis (strain MR-1) OX=211586 GN=SO_2346 PE=4 SV=1	0.42722	-1.5007	2.35514	0.702576
Q8EH53	Putative negative regulator of univalent cation permeability OS=Shewanella oneidensis (strain MR-1) OX=211586 GN=SO_1377 PE=4 SV=1	0.427188	-0.664444	1.51882	0.501515
Q8EBK0	TonB-dependent chitooligosaccharide receptor OS=Shewanella oneidensis (strain MR-1) OX=211586 GN=SO_3514 PE=3 SV=1	0.42251	-1.24831	2.09333	0.669006
Q8ECN1	Periplasmic rhodanese domain protein OS=Shewanella oneidensis (strain MR-1) OX=211586 GN=SO_3105 PE=4 SV=1	0.421417	-1.54191	2.38474	0.712384
Q8E8M3	Antioxidant AhpC/Tsa family OS=Shewanella oneidensis (strain MR-1) OX=211586 GN=SO_4640 PE=4 SV=1	0.414369	-2.16171	2.99044	0.775307
Q8EIQ7	Glycine cleavage system H protein OS=Shewanella oneidensis (strain MR-1) OX=211586 GN=gcvH PE=3 SV=1	0.412048	-1.40357	2.22767	0.695626
Q8EBH2	Transaldolase OS=Shewanella oneidensis (strain MR-1) OX=211586 GN=tal PE=3 SV=1	0.405207	-1.56609	2.37651	0.717071
P82177	Malate dehydrogenase OS=Shewanella oneidensis (strain MR-1) OX=211586 GN=mdh PE=1 SV=2	0.401165	-0.645587	1.44792	0.511323
Q8ECI3	Uncharacterized protein OS=Shewanella oneidensis (strain MR-1) OX=211586 GN=wbfB PE=4 SV=1	0.394815	-0.725424	1.51505	0.548508
Q8ECL7	Alpha-N-acetylgalactosaminidase OS=Shewanella oneidensis (strain MR-1) OX=211586 GN=nagA PE=3 SV=1	0.390104	-0.724795	1.505	0.550608
Q8ED47	Sodium/glutamate symporter OS=Shewanella oneidensis (strain MR-1) OX=211586 GN=gltS PE=3 SV=1	0.373465	-0.911817	1.65875	0.623803
Q8EKJ1	Nitrate-inducible formate dehydrogenase molybdopterin-binding subunit FdnG OS=Shewanella oneidensis (strain MR-1) OX=211586 GN=fdnG PE=3 SV=2	0.372058	-0.710729	1.45485	0.557113
Q8E9G0	Bifunctional diguanylate cyclase/phosphodiesterase LasD-like protein OS=Shewanella oneidensis (strain MR-1) OX=211586 GN=SO_4323 PE=4 SV=1	0.372028	-0.784784	1.52884	0.58342
Q8E9J1	Stator-force generator of H+ coupled flagellar motor MotB OS=Shewanella oneidensis (strain MR-1) OX=211586 GN=motB PE=4 SV=1	0.368004	-1.36758	2.10359	0.715134
Q8ECG2	Glycosyl transferase family 2 WbnI OS=Shewanella oneidensis (strain MR-1) OX=211586 GN=wbnI PE=4 SV=1	0.348747	-0.661634	1.35913	0.555782
Q8EK68	50S ribosomal protein L3 OS=Shewanella oneidensis (strain MR-1) OX=211586 GN=rplC PE=3 SV=1	0.346397	-2.24166	2.93446	0.83638
Q8EEB0	3-deoxy-alpha-D-manno-octulosonate 8-oxidase OS=Shewanella oneidensis (strain MR-1) OX=211586 GN=kdnB PE=1 SV=1	0.340197	-1.00131	1.6817	0.671782
Q8ED25	Lambda phage protein with carbohydrate-binding module OS=Shewanella oneidensis (strain MR-1) OX=211586 GN=SO_2946 PE=1 SV=1	0.328089	-0.991562	1.64774	0.677782
Q8EAZ7	NAD(P) transhydrogenase subunit alpha OS=Shewanella oneidensis (strain MR-1) OX=211586 GN=pntA PE=3 SV=1	0.321761	-0.856376	1.4999	0.647389
Q8EFM1	Invasin domain protein OS=Shewanella oneidensis (strain MR-1) OX=211586 GN=SO_1949 PE=4 SV=1	0.316162	-0.753805	1.38613	0.616925
Q8EAF2	ABC-type phospholipid uptake (Salvage) system ATPase component MlaF OS=Shewanella oneidensis (strain MR-1) OX=211586 GN=mlaF PE=4 SV=1	0.315479	-1.52812	2.15908	0.775307
Q8ED32	Lambda phage uncharacterized protein OS=Shewanella oneidensis (strain MR-1) OX=211586 GN=SO_2939 PE=4 SV=1	0.31424	-0.800013	1.42849	0.634845
Q8EFR7	Periplasmic protein with peptidoglycan binding domain OS=Shewanella oneidensis (strain MR-1) OX=211586 GN=SO_1899 PE=4 SV=2	0.30673	-1.37901	1.99247	0.75758
Q8EBD8	Uncharacterized protein OS=Shewanella oneidensis (strain MR-1) OX=211586 GN=SO_3587 PE=4 SV=1	0.300047	-1.29971	1.89981	0.754855
Q8EK63	50S ribosomal protein L22 OS=Shewanella oneidensis (strain MR-1) OX=211586 GN=rplV PE=3 SV=1	0.283653	-1.95781	2.52512	0.847444
Q8EHL1	Polyribonucleotide nucleotidyltransferase OS=Shewanella oneidensis (strain MR-1) OX=211586 GN=pnp PE=3 SV=2	0.267591	-0.946403	1.48158	0.713066
Q8EHL9	Triosephosphate isomerase OS=Shewanella oneidensis (strain MR-1) OX=211586 GN=tpiA PE=3 SV=1	0.257465	-2.31861	2.83354	0.869112
Q8EC38	Two component signal transduction system hybrid histidine kinase OS=Shewanella oneidensis (strain MR-1) OX=211586 GN=SO_3306 PE=4 SV=1	0.256778	-0.84555	1.3591	0.697147
Q8ECN5	Uncharacterized protein OS=Shewanella oneidensis (strain MR-1) OX=211586 GN=SO_3101 PE=4 SV=1	0.25265	-0.795094	1.30039	0.687564
Q8EA16	TIGR02099 family protein OS=Shewanella oneidensis (strain MR-1) OX=211586 GN=SO_4093 PE=4 SV=1	0.251479	-1.37285	1.87581	0.803033
Q8E9Z4	Signalling protein with GGDEF and EAL domains MshH OS=Shewanella oneidensis (strain MR-1) OX=211586 GN=mshH PE=4 SV=2	0.251313	-0.980757	1.48338	0.731572
Q8EKM3	ABC-type sodium efflux system permease component NatB OS=Shewanella oneidensis (strain MR-1) OX=211586 GN=natB PE=4 SV=1	0.249274	-1.45464	1.95318	0.810125
Q8ED69	Cell division protein ZipA OS=Shewanella oneidensis (strain MR-1) OX=211586 GN=zipA PE=3 SV=1	0.248615	-1.12777	1.625	0.76977
Q8EBE8	CDP-diacylglycerol--serine O-phosphatidyltransferase PssA OS=Shewanella oneidensis (strain MR-1) OX=211586 GN=pssA PE=3 SV=1	0.229624	-1.9818	2.44104	0.869112
Q8ED19	Lambda phage minor tail protein M OS=Shewanella oneidensis (strain MR-1) OX=211586 GN=M PE=4 SV=1	0.21605	-1.4608	1.8929	0.836935
Q8E822	Uncharacterized protein OS=Shewanella oneidensis (strain MR-1) OX=211586 GN=SO_A0131 PE=4 SV=2	0.213704	-1.75381	2.18122	0.862494
Q8EEB8	TonB-dependent receptor OS=Shewanella oneidensis (strain MR-1) OX=211586 GN=SO_2469 PE=3 SV=1	0.210965	-0.859933	1.28186	0.74617
Q8EBR0	Enolase OS=Shewanella oneidensis (strain MR-1) OX=211586 GN=eno PE=3 SV=2	0.209078	-1.02036	1.43852	0.78588
Q8EKC0	Type II secretion system protein M OS=Shewanella oneidensis (strain MR-1) OX=211586 GN=gspM PE=3 SV=1	0.209005	-1.77767	2.19568	0.86946
Q8EGE2	Uncharacterized protein OS=Shewanella oneidensis (strain MR-1) OX=211586 GN=SO_1662 PE=4 SV=2	0.204337	-2.37174	2.78041	0.892697
Q8EH54	Uncharacterized protein OS=Shewanella oneidensis (strain MR-1) OX=211586 GN=SO_1376 PE=4 SV=1	0.202383	-1.0399	1.44467	0.794562
Q8EAX6	PspA/IM30 family protein OS=Shewanella oneidensis (strain MR-1) OX=211586 GN=SO_3765 PE=4 SV=1	0.196273	-1.15719	1.54974	0.819035
Q8EA20	ABC-type efflux system MFP component OS=Shewanella oneidensis (strain MR-1) OX=211586 GN=SO_4089 PE=4 SV=1	0.188425	-1.58586	1.96271	0.870586
Q8EBF2	UPF0319 protein SO_3571 OS=Shewanella oneidensis (strain MR-1) OX=211586 GN=SO_3571 PE=3 SV=1	0.187181	-1.6039	1.97826	0.86946
Q8EIR0	2-octaprenyl-6-methoxyphenol hydroxylase UbiH OS=Shewanella oneidensis (strain MR-1) OX=211586 GN=ubiH PE=4 SV=1	0.177828	-1.53254	1.8882	0.869738
Q8E9Z8	MSHA biogenesis protein MshM OS=Shewanella oneidensis (strain MR-1) OX=211586 GN=mshM PE=4 SV=1	0.176582	-0.868995	1.22216	0.786619
Q8EH87	RNA polymerase sigma factor 24 RpoE OS=Shewanella oneidensis (strain MR-1) OX=211586 GN=rpoE PE=3 SV=1	0.14698	-1.90676	2.20072	0.908863
Q8ED64	Cysteine synthase OS=Shewanella oneidensis (strain MR-1) OX=211586 GN=cysK PE=3 SV=1	0.140673	-1.15949	1.44083	0.86946
Q8EJQ6	Thioredoxin OS=Shewanella oneidensis (strain MR-1) OX=211586 GN=trxA PE=3 SV=1	0.13995	-1.31193	1.59183	0.883752
Q8EK93	Predicted periplasmic protein OS=Shewanella oneidensis (strain MR-1) OX=211586 GN=SO_0203 PE=4 SV=1	0.13757	-2.0404	2.31554	0.916543
Q8E8E8	Tungstate-responsive two component signal transduction system histidine kinase OS=Shewanella oneidensis (strain MR-1) OX=211586 GN=SO_4717 PE=4 SV=1	0.13585	-1.27791	1.54961	0.883752
Q8EEG2	Protease 4 OS=Shewanella oneidensis (strain MR-1) OX=211586 GN=sppA PE=3 SV=1	0.13068	-0.954146	1.21551	0.855506
K4PSF7	Succinate dehydrogenase hydrophobic membrane anchor subunit OS=Shewanella oneidensis (strain MR-1) OX=211586 GN=sdhD PE=4 SV=1	0.117906	-1.06285	1.29867	0.878411
Q8ECJ8	Electron transfer flavoprotein alpha subunit EtfA OS=Shewanella oneidensis (strain MR-1) OX=211586 GN=etfA PE=4 SV=1	0.115957	-1.86924	2.10116	0.922838
Q8EIU5	TonB-dependent nickel receptor NicT OS=Shewanella oneidensis (strain MR-1) OX=211586 GN=nicT PE=3 SV=1	0.115947	-1.64712	1.87901	0.915922
Q8EK77	50S ribosomal protein L1 OS=Shewanella oneidensis (strain MR-1) OX=211586 GN=rplA PE=3 SV=1	0.114158	-1.51345	1.74176	0.913355
Q8EI58	Lysine--tRNA ligase OS=Shewanella oneidensis (strain MR-1) OX=211586 GN=lysS PE=3 SV=1	0.107286	-1.2747	1.48927	0.904539
Q8EF78	Glucans biosynthesis glucosyltransferase H OS=Shewanella oneidensis (strain MR-1) OX=211586 GN=opgH PE=3 SV=1	0.105762	-0.931198	1.14272	0.875281
Q8EKP2	Rhodanese domain protein OS=Shewanella oneidensis (strain MR-1) OX=211586 GN=SO_0050 PE=4 SV=1	0.101077	-0.995055	1.19721	0.888564
Q8EKD3	Phosphoenolpyruvate carboxykinase (ATP) OS=Shewanella oneidensis (strain MR-1) OX=211586 GN=pckA PE=3 SV=1	0.10002	-1.14449	1.34453	0.901093
Q8EI29	NADH-quinone oxidoreductase subunit A OS=Shewanella oneidensis (strain MR-1) OX=211586 GN=nuoA PE=3 SV=1	0.090758	-1.20875	1.39027	0.913355
Q8ED79	Na(+)/H(+) antiporter NhaB OS=Shewanella oneidensis (strain MR-1) OX=211586 GN=nhaB PE=3 SV=1	0.0847956	-1.2108	1.38039	0.916543
Q8EEU5	Chaperone protein HscA homolog OS=Shewanella oneidensis (strain MR-1) OX=211586 GN=hscA PE=3 SV=1	0.0805747	-2.4955	2.65665	0.958279
Q8EHK3	Thymidine phosphorylase OS=Shewanella oneidensis (strain MR-1) OX=211586 GN=deoA PE=3 SV=1	0.0792643	-2.00028	2.15881	0.951684
Q8EIT4	Ferredoxin-dependent glutamate synthase GlsF OS=Shewanella oneidensis (strain MR-1) OX=211586 GN=glsF PE=3 SV=1	0.0786532	-1.01393	1.17123	0.911722
Q8E8H6	Glycosyl transferase family 2 OS=Shewanella oneidensis (strain MR-1) OX=211586 GN=SO_4688 PE=4 SV=1	0.0757227	-1.76723	1.91868	0.948784
Q8ED83	Superoxide dismutase OS=Shewanella oneidensis (strain MR-1) OX=211586 GN=sodB PE=3 SV=1	0.0678711	-2.39853	2.53427	0.96611
Q8E9R6	Uncharacterized protein OS=Shewanella oneidensis (strain MR-1) OX=211586 GN=yigP PE=4 SV=2	0.0641537	-2.0448	2.17311	0.962318
Q8EDZ3	Uncharacterized protein OS=Shewanella oneidensis (strain MR-1) OX=211586 GN=SO_2597 PE=4 SV=1	0.06238	-1.67871	1.80347	0.95543
Q8E8R3	Copper/silver efflux pump permease component CusA OS=Shewanella oneidensis (strain MR-1) OX=211586 GN=cusA PE=3 SV=1	0.0587644	-1.23941	1.35694	0.94567
Q8EIB3	Transketolase Tkt OS=Shewanella oneidensis (strain MR-1) OX=211586 GN=tkt PE=3 SV=1	0.0573473	-1.27502	1.38971	0.948552
Q8EI59	Periplasmic amidohydrolase 3 family protein OS=Shewanella oneidensis (strain MR-1) OX=211586 GN=SO_0990 PE=4 SV=1	0.0565571	-1.6555	1.76861	0.958279
Q8EE53	Sodium:proton antiporter CPA1 family OS=Shewanella oneidensis (strain MR-1) OX=211586 GN=SO_2537 PE=4 SV=1	0.0506925	-1.27677	1.37816	0.953927
Q8EBI4	Isoleucine--tRNA ligase OS=Shewanella oneidensis (strain MR-1) OX=211586 GN=ileS PE=3 SV=1	0.0497939	-1.26339	1.36298	0.954642
Q8EA66	TonB mediated energy transduction system energy transducer component TonB OS=Shewanella oneidensis (strain MR-1) OX=211586 GN=tonB PE=4 SV=1	0.0464492	-1.26865	1.36155	0.956821
Q8EHW1	S-ribosylhomocysteine lyase OS=Shewanella oneidensis (strain MR-1) OX=211586 GN=luxS PE=3 SV=1	0.0424553	-1.44297	1.52788	0.964926
Q8EEF9	Putative membrane protein OS=Shewanella oneidensis (strain MR-1) OX=211586 GN=SO_2423 PE=4 SV=1	0.0295365	-2.09334	2.15242	0.981842
Q8EEN3	Glyceraldehyde-3-phosphate dehydrogenase OS=Shewanella oneidensis (strain MR-1) OX=211586 GN=gapA PE=3 SV=1	0.023313	-1.27358	1.32021	0.978893
Q8EHE5	Chemotaxis signal transduction system methyl accepting sensory transducer OS=Shewanella oneidensis (strain MR-1) OX=211586 GN=SO_1278 PE=4 SV=1	0.0116708	-1.714	1.73734	0.989797
Q8EK89	RNA-binding protein OS=Shewanella oneidensis (strain MR-1) OX=211586 GN=SO_0208 PE=4 SV=1	0.00943053	-1.30398	1.32284	0.989797
Q8E8B4	ATP synthase subunit a OS=Shewanella oneidensis (strain MR-1) OX=211586 GN=atpB PE=3 SV=1	-8.24469e-05	-1.81401	1.81384	0.999918
Q8EBS5	Valine--tRNA ligase OS=Shewanella oneidensis (strain MR-1) OX=211586 GN=valS PE=3 SV=1	-0.00523674	-1.21806	1.20759	0.993226
Q8EG06	Phage shock protein B PspB OS=Shewanella oneidensis (strain MR-1) OX=211586 GN=pspB PE=4 SV=1	-0.00731957	-1.09666	1.08202	0.989797
Q8ECJ6	DNA-binding protein OS=Shewanella oneidensis (strain MR-1) OX=211586 GN=SO_3146 PE=3 SV=1	-0.0138086	-1.87809	1.85047	0.989797
Q8EC45	Phenylalanine/histidine ammonia-lyase family protein OS=Shewanella oneidensis (strain MR-1) OX=211586 GN=SO_3299 PE=4 SV=1	-0.0162086	-1.14725	1.11484	0.981842
Q8EH19	Outer membrane beta barrel protein OS=Shewanella oneidensis (strain MR-1) OX=211586 GN=SO_1412 PE=4 SV=1	-0.016732	-1.37721	1.34375	0.983555
Q8EKF3	Nitrate/nitrite-responsive bifunctional diguanylate cyclase/phosphodiesterase with PAS sensory domain OS=Shewanella oneidensis (strain MR-1) OX=211586 GN=SO_0141 PE=4 SV=1	-0.019443	-1.33759	1.2987	0.981842
Q8EDQ0	Mu phage tail sheath protein GpL OS=Shewanella oneidensis (strain MR-1) OX=211586 GN=gpL PE=4 SV=1	-0.0206041	-1.25867	1.21746	0.980084
Q8EFG1	Adenine phosphoribosyltransferase OS=Shewanella oneidensis (strain MR-1) OX=211586 GN=apt PE=3 SV=2	-0.0250778	-2.58529	2.53513	0.98645
Q8EHM2	ATP-dependent zinc metalloprotease FtsH OS=Shewanella oneidensis (strain MR-1) OX=211586 GN=ftsH PE=3 SV=2	-0.0268573	-1.15344	1.09973	0.971988
Q8E915	NAD+-dependent acetaldehyde dehydrogenase ExaC OS=Shewanella oneidensis (strain MR-1) OX=211586 GN=exaC PE=3 SV=1	-0.0274761	-2.20153	2.14657	0.983289
Q8EK47	DNA-directed RNA polymerase subunit alpha OS=Shewanella oneidensis (strain MR-1) OX=211586 GN=rpoA PE=3 SV=1	-0.027519	-1.32285	1.26781	0.975811
Q8EDK1	Glutaredoxin GrxA OS=Shewanella oneidensis (strain MR-1) OX=211586 GN=grxA PE=4 SV=1	-0.0302046	-1.25471	1.1943	0.970732
Q8ED30	Lambda phage tail assembly protein I OS=Shewanella oneidensis (strain MR-1) OX=211586 GN=I PE=4 SV=1	-0.0328976	-1.36904	1.30325	0.970732
Q8EEH2	Phosphoserine aminotransferase OS=Shewanella oneidensis (strain MR-1) OX=211586 GN=serC PE=3 SV=2	-0.0366084	-2.22405	2.15083	0.978893
Q8EBG0	Predicted lipoprotein OS=Shewanella oneidensis (strain MR-1) OX=211586 GN=SO_3558 PE=4 SV=1	-0.0391485	-2.03023	1.95193	0.976654
Q8E9P8	UDP-N-acetylmuramate--L-alanine ligase OS=Shewanella oneidensis (strain MR-1) OX=211586 GN=murC PE=3 SV=1	-0.0412248	-2.1981	2.11565	0.976886
Q8EKS6	Glycine--tRNA ligase beta subunit OS=Shewanella oneidensis (strain MR-1) OX=211586 GN=glyS PE=3 SV=1	-0.0623972	-1.477	1.3522	0.94701
Q8EKS0	3-ketoacyl-CoA thiolase OS=Shewanella oneidensis (strain MR-1) OX=211586 GN=fadA PE=3 SV=1	-0.0681636	-1.65357	1.51724	0.948271
Q8EJ58	Peptidase S9 family OS=Shewanella oneidensis (strain MR-1) OX=211586 GN=SO_0614 PE=4 SV=1	-0.0778028	-1.17428	1.01867	0.912832
Q8EBJ7	Respiratory NADH dehydrogenase II Ndh OS=Shewanella oneidensis (strain MR-1) OX=211586 GN=ndh PE=4 SV=1	-0.0814343	-1.38628	1.22341	0.921467
Q8EA22	ABC-type efflux system permease component 2 OS=Shewanella oneidensis (strain MR-1) OX=211586 GN=SO_4087 PE=4 SV=1	-0.0839841	-1.55399	1.38602	0.927173
Q8EBX1	Uncharacterized protein OS=Shewanella oneidensis (strain MR-1) OX=211586 GN=SO_3374 PE=4 SV=1	-0.0853095	-1.55906	1.38844	0.926572
Q8EDU9	Phosphoenolpyruvate synthase OS=Shewanella oneidensis (strain MR-1) OX=211586 GN=ppsA PE=3 SV=1	-0.0864996	-1.24344	1.07044	0.908213
Q8EGP3	Recombination-associated protein RdgC OS=Shewanella oneidensis (strain MR-1) OX=211586 GN=rdgC PE=3 SV=1	-0.0963829	-1.30481	1.11204	0.901452
Q8EBF6	Proton/sodium:glutamate symporter DAACS family OS=Shewanella oneidensis (strain MR-1) OX=211586 GN=SO_3562 PE=3 SV=1	-0.101101	-1.21314	1.01094	0.888707
Q8E8J0	2-amino-3-ketobutyrate coenzyme A ligase OS=Shewanella oneidensis (strain MR-1) OX=211586 GN=kbl PE=3 SV=1	-0.10507	-1.3092	1.09906	0.892697
Q8EBS3	Translational regulator CsrA OS=Shewanella oneidensis (strain MR-1) OX=211586 GN=csrA PE=3 SV=1	-0.108491	-2.24933	2.03235	0.93487
Q8EBH9	30S ribosomal protein S20 OS=Shewanella oneidensis (strain MR-1) OX=211586 GN=rpsT PE=3 SV=1	-0.109496	-1.7567	1.53771	0.916543
Q8EIN1	Ca(2+)-dependent phospholipase D PhoD OS=Shewanella oneidensis (strain MR-1) OX=211586 GN=phoD PE=4 SV=1	-0.112888	-1.93321	1.70744	0.91915
K4PU16	Alanine dehydrogenase OS=Shewanella oneidensis (strain MR-1) OX=211586 GN=ald PE=3 SV=1	-0.115049	-1.39026	1.16016	0.888707
Q8EB53	Universal stress protein family OS=Shewanella oneidensis (strain MR-1) OX=211586 GN=SO_3681 PE=4 SV=1	-0.117273	-1.57515	1.3406	0.900168
Q8EC05	Small conductance mechanosensitive ion channel protein MscS OS=Shewanella oneidensis (strain MR-1) OX=211586 GN=mscS PE=4 SV=1	-0.118797	-1.23055	0.99296	0.870121
P59320	Acetylornithine aminotransferase OS=Shewanella oneidensis (strain MR-1) OX=211586 GN=argD PE=3 SV=1	-0.125408	-1.7203	1.46948	0.900168
Q8ED77	Two component signal transduction system histidine kinase with Cache_1 and PAS sensory domains OS=Shewanella oneidensis (strain MR-1) OX=211586 GN=SO_2889 PE=4 SV=1	-0.126502	-1.24759	0.994588	0.865813
Q8EA21	ABC-type efflux system permease component 1 OS=Shewanella oneidensis (strain MR-1) OX=211586 GN=SO_4088 PE=4 SV=1	-0.128653	-2.25771	2.0004	0.922838
Q8E9G3	Type I protein secretion system secretin component AggA OS=Shewanella oneidensis (strain MR-1) OX=211586 GN=aggA PE=4 SV=1	-0.129011	-2.12199	1.86396	0.918796
Q8EHL3	30S ribosomal protein S15 OS=Shewanella oneidensis (strain MR-1) OX=211586 GN=rpsO PE=3 SV=1	-0.131971	-1.65779	1.39385	0.893014
Q8EC58	Cytochrome d ubiquinol oxidase subunit I CydA OS=Shewanella oneidensis (strain MR-1) OX=211586 GN=cydA PE=4 SV=1	-0.137915	-1.65039	1.37456	0.888707
Q8EEY7	Fumarate hydratase class I OS=Shewanella oneidensis (strain MR-1) OX=211586 GN=fumB PE=3 SV=1	-0.14045	-1.77641	1.49551	0.892697
Q8EFS4	Acetyl-CoA:acetoacetate-CoA transferase alpha subunit LiuF OS=Shewanella oneidensis (strain MR-1) OX=211586 GN=liuF PE=4 SV=1	-0.14432	-2.72039	2.43176	0.922147
Q8ECR1	3-oxoacyl-(Acyl-carrier-protein) synthase I FabB OS=Shewanella oneidensis (strain MR-1) OX=211586 GN=fabB PE=3 SV=2	-0.14975	-1.28338	0.983885	0.838119
Q8EIL7	ABC-type macrolide export system secretin component MacC OS=Shewanella oneidensis (strain MR-1) OX=211586 GN=macC PE=3 SV=1	-0.151517	-1.43115	1.12811	0.855506
Q8ECG6	O-antigen biosynthesis glycosyl transferase family 4 OS=Shewanella oneidensis (strain MR-1) OX=211586 GN=SO_3176 PE=4 SV=1	-0.162536	-1.20274	0.877667	0.803735
Q8E8I6	ADP-heptose-LPS heptosyltransferase WaaC OS=Shewanella oneidensis (strain MR-1) OX=211586 GN=waaC PE=4 SV=1	-0.169148	-1.28165	0.943355	0.809215
Q8EKI5	Uncharacterized protein OS=Shewanella oneidensis (strain MR-1) OX=211586 GN=yedE PE=4 SV=1	-0.171492	-1.85196	1.50897	0.875281
Q8E8S5	Signal recognition particle receptor FtsY OS=Shewanella oneidensis (strain MR-1) OX=211586 GN=ftsY PE=3 SV=1	-0.173221	-1.29763	0.95119	0.806987
Q8EGR9	1-deoxy-D-xylulose-5-phosphate synthase OS=Shewanella oneidensis (strain MR-1) OX=211586 GN=dxs PE=3 SV=1	-0.178038	-1.46495	1.10887	0.829667
Q8EEH9	Cytidylate kinase OS=Shewanella oneidensis (strain MR-1) OX=211586 GN=cmk PE=3 SV=1	-0.179659	-1.91758	1.55826	0.871617
Q8EGV7	Isocitrate lyase AceA OS=Shewanella oneidensis (strain MR-1) OX=211586 GN=aceA PE=4 SV=1	-0.180131	-2.15422	1.79395	0.885476
Q8EGH4	Elongation factor Ts OS=Shewanella oneidensis (strain MR-1) OX=211586 GN=tsf PE=3 SV=1	-0.187866	-1.4639	1.08817	0.815781
Q8E9Z0	50S ribosomal protein L31 OS=Shewanella oneidensis (strain MR-1) OX=211586 GN=rpmE PE=3 SV=1	-0.187991	-1.76469	1.38871	0.856392
Q8EFU5	Biosynthetic arginine decarboxylase OS=Shewanella oneidensis (strain MR-1) OX=211586 GN=speA PE=3 SV=1	-0.190289	-1.58898	1.2084	0.833108
Q8EEE6	tRNA U34 carboxymethyltransferase OS=Shewanella oneidensis (strain MR-1) OX=211586 GN=cmoB PE=3 SV=1	-0.191322	-2.7674	2.38475	0.900168
Q8EG34	Extracellular iron oxide respiratory system surface decaheme cytochrome c component MtrC OS=Shewanella oneidensis (strain MR-1) OX=211586 GN=mtrC PE=1 SV=1	-0.195425	-1.36722	0.976369	0.789027
Q8ED10	Lambda phage head-tail connector protein HK97-gp6 family OS=Shewanella oneidensis (strain MR-1) OX=211586 GN=SO_2961 PE=4 SV=1	-0.196126	-2.13011	1.73786	0.871617
Q8EK21	Type IV pilus secretin PilQ OS=Shewanella oneidensis (strain MR-1) OX=211586 GN=pilQ PE=3 SV=1	-0.196821	-1.55758	1.16394	0.819035
Q8EGH9	2,3,4,5-tetrahydropyridine-2,6-dicarboxylate N-succinyltransferase OS=Shewanella oneidensis (strain MR-1) OX=211586 GN=dapD PE=3 SV=1	-0.200771	-1.49579	1.09425	0.803033
Q8EIT5	Phosphoglycerate mutase family protein OS=Shewanella oneidensis (strain MR-1) OX=211586 GN=SO_0749 PE=4 SV=1	-0.202265	-1.9174	1.51287	0.853749
Q8EJW5	Multifunctional sensory protein/diguanylate cyclase/signalling protein with EAL domain OS=Shewanella oneidensis (strain MR-1) OX=211586 GN=SO_0341 PE=4 SV=1	-0.202499	-1.54129	1.13629	0.807442
Q8EKA6	Bifunctional autotransporter / adhesin cadherin family OS=Shewanella oneidensis (strain MR-1) OX=211586 GN=SO_0189 PE=4 SV=1	-0.202569	-2.37171	1.96657	0.885454
Q8EKS5	Glycine--tRNA ligase alpha subunit OS=Shewanella oneidensis (strain MR-1) OX=211586 GN=glyQ PE=3 SV=1	-0.204044	-2.78012	2.37203	0.892697
Q8EI36	NADH-quinone oxidoreductase subunit I OS=Shewanella oneidensis (strain MR-1) OX=211586 GN=nuoI PE=3 SV=1	-0.207966	-1.59493	1.179	0.811598
Q8EHR6	Uncharacterized protein OS=Shewanella oneidensis (strain MR-1) OX=211586 GN=SO_1151 PE=4 SV=1	-0.209966	-1.5302	1.11027	0.796756
Q8EJV8	Phospholipid/glycerol acyltransferase family protein OS=Shewanella oneidensis (strain MR-1) OX=211586 GN=SO_0348 PE=4 SV=1	-0.215969	-1.52926	1.09732	0.792498
Q8EAW5	Uncharacterized protein OS=Shewanella oneidensis (strain MR-1) OX=211586 GN=SO_3776 PE=4 SV=1	-0.226325	-2.18556	1.73291	0.853494
Q8EE98	Glucose-6-phosphate 1-dehydrogenase OS=Shewanella oneidensis (strain MR-1) OX=211586 GN=zwf PE=3 SV=1	-0.243428	-1.50973	1.02288	0.74849
Q8EGT6	Proton:peptide symporter POT family OS=Shewanella oneidensis (strain MR-1) OX=211586 GN=SO_1505 PE=4 SV=1	-0.244109	-2.26695	1.77873	0.853494
Q8EJE7	Heavy metal efflux pump permease component CzcA family OS=Shewanella oneidensis (strain MR-1) OX=211586 GN=SO_0520 PE=3 SV=1	-0.249886	-1.41839	0.918619	0.721682
Q8EJ75	Uncharacterized protein OS=Shewanella oneidensis (strain MR-1) OX=211586 GN=SO_0595 PE=4 SV=2	-0.253336	-2.82941	2.32274	0.86946
Q8EAH1	Uncharacterized protein OS=Shewanella oneidensis (strain MR-1) OX=211586 GN=SO_3931 PE=4 SV=1	-0.259552	-1.49149	0.972388	0.721682
Q8E9G7	Protoheme synthesis protein HemY OS=Shewanella oneidensis (strain MR-1) OX=211586 GN=hemY PE=4 SV=1	-0.266999	-1.29761	0.763611	0.666157
Q8EDT0	Mu phage uncharacterized protein OS=Shewanella oneidensis (strain MR-1) OX=211586 GN=SO_2663 PE=4 SV=2	-0.298584	-1.34304	0.745875	0.630933
Q8EEM0	Cbb3-type cytochrome oxidase-associated copper translocating P-ATPase CcoI OS=Shewanella oneidensis (strain MR-1) OX=211586 GN=ccoI PE=3 SV=1	-0.29948	-1.54549	0.946528	0.687564
Q8EHC8	Glutamate-1-semialdehyde 2,1-aminomutase OS=Shewanella oneidensis (strain MR-1) OX=211586 GN=hemL PE=3 SV=1	-0.299847	-1.81562	1.21592	0.745381
Q8EBP2	3,4-dihydroxy-2-butanone 4-phosphate synthase OS=Shewanella oneidensis (strain MR-1) OX=211586 GN=ribBA PE=3 SV=1	-0.313151	-1.86527	1.23897	0.729663
Q8EAD7	Putative outer membrane lipoprotein YiaD OS=Shewanella oneidensis (strain MR-1) OX=211586 GN=yiaD PE=3 SV=1	-0.319124	-1.38697	0.748724	0.61204
Q8EBG8	Anti-sigma factor OS=Shewanella oneidensis (strain MR-1) OX=211586 GN=SO_3550 PE=4 SV=1	-0.319833	-1.76672	1.12706	0.709219
Q8ED41	Uncharacterized protein OS=Shewanella oneidensis (strain MR-1) OX=211586 GN=SO_2929 PE=4 SV=1	-0.324549	-1.49527	0.846177	0.641149
Q8EGS5	L-lactate dehydrogenase iron-sulfur cluster-binding protein LldF OS=Shewanella oneidensis (strain MR-1) OX=211586 GN=lldF PE=4 SV=1	-0.32665	-1.48606	0.832758	0.634845
Q8EHU1	Gamma-glutamyl phosphate reductase OS=Shewanella oneidensis (strain MR-1) OX=211586 GN=proA PE=3 SV=1	-0.327646	-1.8515	1.19621	0.712363
Q8EKC8	T2aSS secretion system assembly ATPase GspE OS=Shewanella oneidensis (strain MR-1) OX=211586 GN=gspE PE=4 SV=1	-0.330483	-1.82638	1.16542	0.712824
Q8EA02	MshA biogenesis protein MshF OS=Shewanella oneidensis (strain MR-1) OX=211586 GN=mshF PE=4 SV=1	-0.346133	-2.20179	1.50952	0.751915
Q8EHM4	Putative RNA-binding protein YhbY OS=Shewanella oneidensis (strain MR-1) OX=211586 GN=yhbY PE=4 SV=1	-0.348308	-2.30903	1.61242	0.75758
Q8EH42	Aminopeptidase P AmpP OS=Shewanella oneidensis (strain MR-1) OX=211586 GN=ampP PE=4 SV=1	-0.350821	-1.94842	1.24677	0.705493
Q8EK58	50S ribosomal protein L24 OS=Shewanella oneidensis (strain MR-1) OX=211586 GN=rplX PE=3 SV=1	-0.352394	-4.98715	4.28236	0.904681
Q8EAP2	NAD-dependent malic enzyme OS=Shewanella oneidensis (strain MR-1) OX=211586 GN=maeA PE=3 SV=1	-0.352867	-1.86526	1.15953	0.687564
Q8CX47	O-acetylhomoserine (Thiol)-lyase MetY OS=Shewanella oneidensis (strain MR-1) OX=211586 GN=metY PE=3 SV=1	-0.354215	-2.31316	1.60473	0.753472
Q8EI30	NADH-quinone oxidoreductase subunit B OS=Shewanella oneidensis (strain MR-1) OX=211586 GN=nuoB PE=3 SV=1	-0.355551	-1.83372	1.12261	0.687564
Q8ECG8	O-antigen biosynthesis glycosyl transferase family 4 OS=Shewanella oneidensis (strain MR-1) OX=211586 GN=SO_3174 PE=4 SV=1	-0.356017	-1.51095	0.798919	0.599687
Q8EAJ8	Global secretion system secretin TolC OS=Shewanella oneidensis (strain MR-1) OX=211586 GN=tolC PE=4 SV=1	-0.358169	-1.88597	1.16963	0.695626
Q8EGF6	Cold shock protein Csp family OS=Shewanella oneidensis (strain MR-1) OX=211586 GN=SO_1648 PE=4 SV=2	-0.361035	-2.54595	1.82388	0.788254
Q8EBQ2	Histidine kinase OS=Shewanella oneidensis (strain MR-1) OX=211586 GN=barA PE=4 SV=2	-0.361072	-1.49365	0.771511	0.587054
Q8EID9	Na(+)-translocating NADH-quinone reductase subunit B OS=Shewanella oneidensis (strain MR-1) OX=211586 GN=nqrB PE=3 SV=1	-0.361975	-2.24193	1.51798	0.744297
Q8EFN7	Succinate--CoA ligase [ADP-forming] subunit alpha OS=Shewanella oneidensis (strain MR-1) OX=211586 GN=sucD PE=3 SV=1	-0.365352	-1.7967	1.06599	0.669585
Q8EEF5	ArgR-regulated TonB-dependent receptor OS=Shewanella oneidensis (strain MR-1) OX=211586 GN=SO_2427 PE=3 SV=1	-0.368506	-1.53467	0.797659	0.589412
Q8EDD8	Two component signal transduction system histidine kinase with GAF sensory domain YehU OS=Shewanella oneidensis (strain MR-1) OX=211586 GN=yehU PE=4 SV=1	-0.373815	-1.49916	0.75153	0.568451
Q8EB65	TonB-dependent heme/hemoglobin receptor HmuA OS=Shewanella oneidensis (strain MR-1) OX=211586 GN=hmuA PE=3 SV=1	-0.380543	-3.89459	3.1335	0.866734
Q8EG82	Phosphate import ATP-binding protein PstB 1 OS=Shewanella oneidensis (strain MR-1) OX=211586 GN=pstB1 PE=3 SV=2	-0.390475	-2.44964	1.66869	0.747613
Q8EK19	3-dehydroquinate synthase OS=Shewanella oneidensis (strain MR-1) OX=211586 GN=aroB PE=3 SV=1	-0.392159	-2.09692	1.3126	0.692045
Q8EA81	Single-stranded DNA-binding protein OS=Shewanella oneidensis (strain MR-1) OX=211586 GN=ssb PE=3 SV=1	-0.399997	-2.36963	1.56963	0.727929
Q8EDQ9	Mu phage protease GpI OS=Shewanella oneidensis (strain MR-1) OX=211586 GN=gpI PE=4 SV=1	-0.411869	-2.43426	1.61053	0.719894
Q8EF74	50S ribosomal protein L25 OS=Shewanella oneidensis (strain MR-1) OX=211586 GN=rplY PE=3 SV=2	-0.418485	-3.03879	2.20182	0.786619
Q8E8I3	Glycosyl transferase family 4 OS=Shewanella oneidensis (strain MR-1) OX=211586 GN=SO_4681 PE=4 SV=1	-0.422879	-1.60297	0.757213	0.542946
Q8EDH1	3-oxoacyl-[acyl-carrier-protein] synthase 3 OS=Shewanella oneidensis (strain MR-1) OX=211586 GN=fabH PE=3 SV=1	-0.423285	-1.69316	0.846592	0.563783
Q8EGP0	Phosphate-responsive two component signal transduction system histidine kinase with PAS and DUF3329 domains PhoR OS=Shewanella oneidensis (strain MR-1) OX=211586 GN=phoR PE=4 SV=1	-0.426506	-1.63743	0.784416	0.543981
Q8EIQ9	FAD-dependent hydroxylase VisC OS=Shewanella oneidensis (strain MR-1) OX=211586 GN=visC PE=4 SV=1	-0.444715	-1.86575	0.976319	0.592746
Q8EAG8	23S rRNA (guanosine-2-O-)-methyltransferase RlmB OS=Shewanella oneidensis (strain MR-1) OX=211586 GN=rlmB PE=3 SV=1	-0.45314	-1.46625	0.55997	0.440112
Q8EHS2	Magnesium transporter MgtE OS=Shewanella oneidensis (strain MR-1) OX=211586 GN=SO_1145 PE=3 SV=1	-0.457259	-2.33943	1.42491	0.67621
Q8ECX0	Lambda phage uncharacterized protein OS=Shewanella oneidensis (strain MR-1) OX=211586 GN=SO_3002 PE=4 SV=1	-0.460579	-1.55603	0.634876	0.465577
Q8EDV0	Oxidoreductase FAD-binding protein OS=Shewanella oneidensis (strain MR-1) OX=211586 GN=SO_2643 PE=4 SV=1	-0.460701	-1.50036	0.578958	0.443396
Q8EJM1	Bifunctional purine biosynthesis protein PurH OS=Shewanella oneidensis (strain MR-1) OX=211586 GN=purH PE=3 SV=1	-0.46509	-1.81458	0.884397	0.551466
Q8E9S6	Inorganic pyrophosphatase manganese-dependent PpaC OS=Shewanella oneidensis (strain MR-1) OX=211586 GN=ppaC PE=4 SV=1	-0.466802	-2.04294	1.10933	0.603514
Q8E9E1	Serine-pyruvate aminotransferase AgxT OS=Shewanella oneidensis (strain MR-1) OX=211586 GN=agxT PE=3 SV=2	-0.468389	-1.62306	0.686281	0.482485
Q8EDU3	Uncharacterized protein OS=Shewanella oneidensis (strain MR-1) OX=211586 GN=SO_2650 PE=4 SV=1	-0.46867	-1.81545	0.87811	0.548508
Q8EH94	Thymidylate synthase OS=Shewanella oneidensis (strain MR-1) OX=211586 GN=thyA PE=3 SV=1	-0.478307	-2.44229	1.48568	0.668071
Q8EAR3	Peptide chain release factor 1 OS=Shewanella oneidensis (strain MR-1) OX=211586 GN=prfA PE=3 SV=1	-0.479515	-2.44809	1.48906	0.668071
Q8EE95	Acyl-CoA dehydrogenase FadE1 OS=Shewanella oneidensis (strain MR-1) OX=211586 GN=fadE1 PE=4 SV=1	-0.48081	-1.4929	0.53128	0.411349
Q8EEZ1	Asparagine--tRNA ligase OS=Shewanella oneidensis (strain MR-1) OX=211586 GN=asnS PE=3 SV=1	-0.482329	-1.704	0.739339	0.497459
Q8EE80	Electron transport complex subunit B OS=Shewanella oneidensis (strain MR-1) OX=211586 GN=rnfB PE=3 SV=1	-0.49817	-2.0841	1.08776	0.587054
Q8EG63	Polyolefin biosynthetic pathway dehydrogenase/isomerase OleD OS=Shewanella oneidensis (strain MR-1) OX=211586 GN=oleD PE=4 SV=1	-0.503779	-2.54605	1.5385	0.664944
Q8EDH2	Malonyl CoA-acyl carrier protein transacylase OS=Shewanella oneidensis (strain MR-1) OX=211586 GN=fabD PE=3 SV=1	-0.504611	-2.58829	1.57907	0.669278
Q8EDX2	Methionine--tRNA ligase OS=Shewanella oneidensis (strain MR-1) OX=211586 GN=metG PE=3 SV=1	-0.5174	-2.52776	1.49296	0.64917
Q8EDH4	Acyl carrier protein OS=Shewanella oneidensis (strain MR-1) OX=211586 GN=acpP PE=3 SV=1	-0.519191	-2.49216	1.45378	0.656919
Q8EDM3	Uncharacterized protein OS=Shewanella oneidensis (strain MR-1) OX=211586 GN=SO_2720 PE=4 SV=1	-0.524036	-1.71168	0.663607	0.445028
Q8EHK0	Purine nucleoside phosphorylase DeoD-type 2 OS=Shewanella oneidensis (strain MR-1) OX=211586 GN=deoD2 PE=3 SV=1	-0.530314	-2.31143	1.2508	0.601485
Q8EKL7	Long-chain-fatty-acid--CoA ligase IcfE OS=Shewanella oneidensis (strain MR-1) OX=211586 GN=icfE PE=4 SV=2	-0.535221	-1.65997	0.589526	0.411349
Q8EFH7	Peptidyl-prolyl cis-trans isomerase OS=Shewanella oneidensis (strain MR-1) OX=211586 GN=SO_1995 PE=3 SV=1	-0.536368	-1.73488	0.66214	0.440112
Q8EHB3	Tyrosine--tRNA ligase OS=Shewanella oneidensis (strain MR-1) OX=211586 GN=tyrS PE=3 SV=1	-0.546411	-2.22281	1.12999	0.565777
Q8EEL6	Cbb3-type cytochrome c oxidase subunit II CcoO OS=Shewanella oneidensis (strain MR-1) OX=211586 GN=ccoO PE=4 SV=1	-0.548218	-1.85794	0.761507	0.467698
Q8EJP1	AmpD signaling modulator AmpE OS=Shewanella oneidensis (strain MR-1) OX=211586 GN=ampE PE=4 SV=1	-0.556555	-1.83832	0.725208	0.450444
Q8EGW0	Glutathione-gated K(+)-efflux system KefC OS=Shewanella oneidensis (strain MR-1) OX=211586 GN=kefC PE=3 SV=1	-0.559602	-2.2691	1.14989	0.564083
Q8E872	Uncharacterized protein OS=Shewanella oneidensis (strain MR-1) OX=211586 GN=SO_A0051 PE=4 SV=1	-0.569059	-1.5792	0.44108	0.33227
Q8E9H0	Porphobilinogen deaminase OS=Shewanella oneidensis (strain MR-1) OX=211586 GN=hemC PE=3 SV=1	-0.578319	-2.36434	1.20771	0.580486
Q8EHG0	Mercaptopyruvate sulfurtransferase SseA OS=Shewanella oneidensis (strain MR-1) OX=211586 GN=sseA PE=4 SV=1	-0.58335	-2.10366	0.936954	0.497484
Q8E9T7	Metallophosphatase binding domain protein OS=Shewanella oneidensis (strain MR-1) OX=211586 GN=SO_4176 PE=4 SV=2	-0.584468	-2.29905	1.13012	0.549671
Q8EJ03	Mu phage signal peptidase I domain protein OS=Shewanella oneidensis (strain MR-1) OX=211586 GN=SO_0672 PE=4 SV=1	-0.590518	-2.35556	1.17453	0.556412
Q8EFP6	RND superfamily efflux pump permease component 2 OS=Shewanella oneidensis (strain MR-1) OX=211586 GN=SO_1924 PE=3 SV=1	-0.598378	-1.92775	0.730992	0.433169
Q8ECF6	Glucose-1-phosphate thymidylyltransferase OS=Shewanella oneidensis (strain MR-1) OX=211586 GN=rmlA PE=3 SV=1	-0.602976	-1.90276	0.696805	0.424392
Q8EG14	Enoyl-[acyl-carrier-protein] reductase [NADH] OS=Shewanella oneidensis (strain MR-1) OX=211586 GN=fabV PE=3 SV=1	-0.604837	-1.74623	0.536555	0.361448
Q8E947	ABC-type molybdate uptake system ATPase component ModC OS=Shewanella oneidensis (strain MR-1) OX=211586 GN=modC PE=3 SV=1	-0.618792	-1.85475	0.617169	0.384311
Q8E9G6	Biofilm-promoting protein BpfA OS=Shewanella oneidensis (strain MR-1) OX=211586 GN=bpfA PE=4 SV=1	-0.62184	-1.65781	0.414128	0.303347
Q8EFV8	Endopeptidase La OS=Shewanella oneidensis (strain MR-1) OX=211586 GN=SO_1857 PE=3 SV=1	-0.622727	-2.58417	1.33871	0.566739
Q8EJF9	Uncharacterized protein OS=Shewanella oneidensis (strain MR-1) OX=211586 GN=SO_0508 PE=4 SV=2	-0.625176	-1.71855	0.468201	0.32501
Q8EKJ5	Urocanate hydratase OS=Shewanella oneidensis (strain MR-1) OX=211586 GN=hutU PE=3 SV=1	-0.62631	-1.97743	0.72481	0.418666
Q8EK74	DNA-directed RNA polymerase subunit beta OS=Shewanella oneidensis (strain MR-1) OX=211586 GN=rpoB PE=3 SV=1	-0.630174	-1.81158	0.551232	0.35935
Q8EAV8	ATP-dependent RNA helicase RhlE OS=Shewanella oneidensis (strain MR-1) OX=211586 GN=rhlE PE=3 SV=1	-0.639341	-3.35031	2.07162	0.694047
Q8EHA0	Adenylate cyclase CyaC OS=Shewanella oneidensis (strain MR-1) OX=211586 GN=cyaC PE=4 SV=2	-0.644081	-2.05092	0.762755	0.425237
Q8EA41	Uncharacterized protein OS=Shewanella oneidensis (strain MR-1) OX=211586 GN=SO_4068 PE=4 SV=1	-0.65336	-2.26197	0.955249	0.47593
Q8EEH1	DNA gyrase subunit A OS=Shewanella oneidensis (strain MR-1) OX=211586 GN=gyrA PE=3 SV=1	-0.659532	-2.02261	0.70355	0.403216
Q8EAT7	UDP-N-acetylmuramate--L-alanyl-gamma-D-glutamyl-meso-2,6-diaminoheptandioate ligase OS=Shewanella oneidensis (strain MR-1) OX=211586 GN=mpl PE=3 SV=1	-0.660963	-1.9557	0.633775	0.37489
Q8EFF7	Chaperone protein HtpG OS=Shewanella oneidensis (strain MR-1) OX=211586 GN=htpG PE=3 SV=1	-0.663018	-2.22002	0.893983	0.45956
Q8EGV1	Alcohol dehydrogenase II AdhB OS=Shewanella oneidensis (strain MR-1) OX=211586 GN=adhB PE=4 SV=1	-0.666271	-1.88169	0.54915	0.346391
Q8EAP5	Uncharacterized protein OS=Shewanella oneidensis (strain MR-1) OX=211586 GN=SO_3852 PE=4 SV=2	-0.666585	-3.24266	1.90949	0.634845
Q8EG65	Polyolefin biosynthetic pathway thioesterase OleB OS=Shewanella oneidensis (strain MR-1) OX=211586 GN=oleB PE=4 SV=1	-0.671621	-2.18331	0.840072	0.438711
Q8EJN1	Aconitate hydratase B OS=Shewanella oneidensis (strain MR-1) OX=211586 GN=acnB PE=3 SV=1	-0.67179	-1.9965	0.65292	0.383645
Q8E8E3	Molybdenum cofactor guanylyltransferase OS=Shewanella oneidensis (strain MR-1) OX=211586 GN=mobA PE=3 SV=1	-0.677057	-2.97627	1.62215	0.605186
Q8E876	Uncharacterized protein OS=Shewanella oneidensis (strain MR-1) OX=211586 GN=SO_A0047 PE=4 SV=2	-0.686049	-2.64497	1.27287	0.530116
Q8EI31	NADH-quinone oxidoreductase subunit C/D OS=Shewanella oneidensis (strain MR-1) OX=211586 GN=nuoC PE=3 SV=1	-0.69272	-2.2201	0.834662	0.434461
Q8EAZ4	Transcriptional regulator TetR family OS=Shewanella oneidensis (strain MR-1) OX=211586 GN=SO_3743 PE=4 SV=1	-0.69575	-1.97912	0.587619	0.351695
Q8ECI7	Phospholipase patatin family OS=Shewanella oneidensis (strain MR-1) OX=211586 GN=SO_3155 PE=4 SV=1	-0.702273	-2.10903	0.704484	0.388773
Q8EC52	GMP synthase [glutamine-hydrolyzing] OS=Shewanella oneidensis (strain MR-1) OX=211586 GN=guaA PE=3 SV=1	-0.71635	-2.40972	0.977015	0.450444
Q8EJW2	2-methylcitrate synthase OS=Shewanella oneidensis (strain MR-1) OX=211586 GN=prpC PE=3 SV=1	-0.718235	-2.00155	0.565077	0.330864
Q8ECR8	Amidophosphoribosyltransferase OS=Shewanella oneidensis (strain MR-1) OX=211586 GN=purF PE=3 SV=1	-0.7192	-2.38828	0.94988	0.450444
Q8ECI8	Proline--tRNA ligase OS=Shewanella oneidensis (strain MR-1) OX=211586 GN=proS PE=3 SV=1	-0.723312	-2.75637	1.30975	0.540607
Q8E9B7	Acyltransferase family protein OS=Shewanella oneidensis (strain MR-1) OX=211586 GN=SO_4367 PE=4 SV=1	-0.730623	-2.40939	0.948141	0.440112
Q8EK71	Elongation factor G 1 OS=Shewanella oneidensis (strain MR-1) OX=211586 GN=fusA PE=3 SV=1	-0.736223	-2.96036	1.48791	0.569727
Q8EDV5	Leucine dehydrogenase Ldh OS=Shewanella oneidensis (strain MR-1) OX=211586 GN=ldh PE=4 SV=1	-0.738313	-2.13029	0.653666	0.361266
Q8E8E2	Bifunctional tungstopterin-guanine dinucleotide biosynthesis protein MobB/MoeA OS=Shewanella oneidensis (strain MR-1) OX=211586 GN=mobB PE=4 SV=1	-0.745141	-1.9585	0.468218	0.292458
Q8EKR3	Oxygen-independent protoporphyrinogen oxidase HemG OS=Shewanella oneidensis (strain MR-1) OX=211586 GN=hemG PE=4 SV=1	-0.756101	-1.78618	0.27398	0.206024
Q8EC57	Phosphoribosylformylglycinamidine synthase OS=Shewanella oneidensis (strain MR-1) OX=211586 GN=purL PE=3 SV=1	-0.760193	-2.15019	0.629809	0.3434
Q8EGC4	Enoyl-CoA hydratase IvdD OS=Shewanella oneidensis (strain MR-1) OX=211586 GN=ivdD PE=3 SV=1	-0.762307	-3.10716	1.58255	0.566586
Q8EBH8	Transcriptional activator HlyU OS=Shewanella oneidensis (strain MR-1) OX=211586 GN=hlyU PE=4 SV=1	-0.780168	-3.14289	1.58255	0.5617
Q8EB52	Uncharacterized protein OS=Shewanella oneidensis (strain MR-1) OX=211586 GN=SO_3682 PE=4 SV=1	-0.786714	-2.09243	0.519003	0.297377
Q8EBR4	tRNA pseudouridine synthase D OS=Shewanella oneidensis (strain MR-1) OX=211586 GN=truD PE=3 SV=1	-0.788718	-2.77558	1.19815	0.47021
Q8EB16	Oxygen-independent protoporphyrinogen oxidase HemG OS=Shewanella oneidensis (strain MR-1) OX=211586 GN=hemG PE=4 SV=2	-0.792658	-2.27107	0.685753	0.346391
Q8EH64	Sodium:proton antiporter CPA1 family OS=Shewanella oneidensis (strain MR-1) OX=211586 GN=SO_1366 PE=4 SV=1	-0.792992	-1.83696	0.250981	0.19099
Q8EB51	Aldehyde dehydrogenase OS=Shewanella oneidensis (strain MR-1) OX=211586 GN=calB PE=3 SV=1	-0.798621	-2.0159	0.418658	0.259965
Q8EEU9	Cysteine desulfurase IscS OS=Shewanella oneidensis (strain MR-1) OX=211586 GN=iscS PE=3 SV=1	-0.803462	-2.61569	1.00876	0.443396
K4PW15	Serine acetyltransferase OS=Shewanella oneidensis (strain MR-1) OX=211586 GN=wbnJ PE=3 SV=1	-0.814449	-2.008	0.379106	0.241161
Q8EFD4	Prolyl oligopeptidase family S9 protein OS=Shewanella oneidensis (strain MR-1) OX=211586 GN=SO_2047 PE=4 SV=1	-0.818551	-2.53445	0.897345	0.398442
Q8EAF6	Transcriptional regulator BolA family YrbA OS=Shewanella oneidensis (strain MR-1) OX=211586 GN=yrbA PE=3 SV=1	-0.818566	-3.39464	1.75751	0.555782
Q8EDV8	Adenylosuccinate lyase OS=Shewanella oneidensis (strain MR-1) OX=211586 GN=purB PE=3 SV=1	-0.819935	-2.11242	0.472546	0.276627
Q8EHS7	4-hydroxy-tetrahydrodipicolinate reductase OS=Shewanella oneidensis (strain MR-1) OX=211586 GN=dapB PE=3 SV=2	-0.820497	-2.85955	1.21856	0.464051
Q8EKF2	3,4-dihydroxy-2-butanone 4-phosphate synthase OS=Shewanella oneidensis (strain MR-1) OX=211586 GN=ribB PE=3 SV=1	-0.836584	-2.70489	1.03172	0.428532
Q8EBH1	Glucose-6-phosphate isomerase OS=Shewanella oneidensis (strain MR-1) OX=211586 GN=pgi PE=3 SV=1	-0.843599	-2.32789	0.640688	0.318694
Q8EF99	Phenylalanine--tRNA ligase beta subunit OS=Shewanella oneidensis (strain MR-1) OX=211586 GN=pheT PE=3 SV=1	-0.843851	-2.18211	0.494406	0.279586
Q8ECA0	Flagellar basal-body rod protein FlgG OS=Shewanella oneidensis (strain MR-1) OX=211586 GN=flgG PE=3 SV=1	-0.858468	-2.55718	0.840245	0.384454
Q8EDW6	Translation initiation factor IF-1 OS=Shewanella oneidensis (strain MR-1) OX=211586 GN=infA PE=3 SV=1	-0.858975	-2.66047	0.942523	0.398442
Q8EGY1	Type II restriction-modification system methyltransferase OS=Shewanella oneidensis (strain MR-1) OX=211586 GN=SO_1457 PE=4 SV=1	-0.869517	-2.17227	0.433242	0.250907
Q8EF20	Uncharacterized protein OS=Shewanella oneidensis (strain MR-1) OX=211586 GN=yecM PE=4 SV=1	-0.878308	-3.03326	1.27664	0.458598
Q8CX45	tRNA-2-methylthio-N(6)-dimethylallyladenosine synthase OS=Shewanella oneidensis (strain MR-1) OX=211586 GN=miaB PE=3 SV=1	-0.880887	-2.09545	0.333672	0.211692
Q8EKQ7	Peptidoglycan-binding protein OS=Shewanella oneidensis (strain MR-1) OX=211586 GN=SO_0033 PE=4 SV=1	-0.882641	-2.65192	0.886635	0.388784
Q8CVD1	Periplasmic stress adaptor protein CpxP OS=Shewanella oneidensis (strain MR-1) OX=211586 GN=cpxP PE=4 SV=1	-0.891188	-2.97213	1.18975	0.451341
Q8EFD9	Protein-methionine-sulfoxide reductase catalytic subunit MsrP OS=Shewanella oneidensis (strain MR-1) OX=211586 GN=yedY PE=3 SV=1	-0.900102	-1.9444	0.1442	0.142094
K4PU03	Peptide chain release factor 3 OS=Shewanella oneidensis (strain MR-1) OX=211586 GN=prfC PE=3 SV=1	-0.907218	-2.62845	0.814017	0.354259
Q8EG07	PspF antagonist PspA OS=Shewanella oneidensis (strain MR-1) OX=211586 GN=pspA PE=4 SV=1	-0.913539	-2.6856	0.858525	0.370919
Q8EGS2	Lactate transport protein LctP family OS=Shewanella oneidensis (strain MR-1) OX=211586 GN=SO_1522 PE=4 SV=1	-0.925746	-4.00489	2.1534	0.603893
Q8E9F0	Membrane protein CreD OS=Shewanella oneidensis (strain MR-1) OX=211586 GN=creD PE=4 SV=2	-0.926179	-1.93435	0.0819956	0.120688
Q8EF98	Integration host factor subunit alpha OS=Shewanella oneidensis (strain MR-1) OX=211586 GN=ihfA PE=3 SV=1	-0.937163	-2.86812	0.993794	0.390331
Q8ECS5	Phenylalanine/histidine ammonia-lyase family protein OS=Shewanella oneidensis (strain MR-1) OX=211586 GN=SO_3057 PE=4 SV=2	-0.939127	-2.14415	0.265894	0.180232
Q8EGP6	TPR domain protein OS=Shewanella oneidensis (strain MR-1) OX=211586 GN=SO_1552 PE=4 SV=1	-0.953091	-1.98796	0.081774	0.119946
Q8EEZ4	Ribosomal RNA small subunit methyltransferase RsmB family OS=Shewanella oneidensis (strain MR-1) OX=211586 GN=SO_2215 PE=3 SV=1	-0.954163	-2.79399	0.885669	0.361266
Q8ED11	Lambda phage phage head-tail joining protein OS=Shewanella oneidensis (strain MR-1) OX=211586 GN=SO_2960 PE=4 SV=1	-0.95668	-2.29219	0.378834	0.216852
Q8EK76	50S ribosomal protein L10 OS=Shewanella oneidensis (strain MR-1) OX=211586 GN=rplJ PE=3 SV=1	-0.985167	-2.88081	0.910474	0.371071
Q8ECF7	Enzyme for biosynthesis of dTDP-Qui4N OS=Shewanella oneidensis (strain MR-1) OX=211586 GN=SO_3185 PE=3 SV=1	-0.988707	-2.63215	0.65474	0.292626
Q8E8H4	Glycosyl transferase family 83 OS=Shewanella oneidensis (strain MR-1) OX=211586 GN=SO_4690 PE=4 SV=1	-0.992676	-3.01647	1.03111	0.37908
Q8EGV2	Putative cytoplasmic protein OS=Shewanella oneidensis (strain MR-1) OX=211586 GN=SO_1489 PE=4 SV=2	-1.0045	-2.26763	0.258627	0.172835
Q8EHL2	Bifunctional diguanylate cyclase/phosphodiesterase OS=Shewanella oneidensis (strain MR-1) OX=211586 GN=SO_1208 PE=4 SV=1	-1.0085	-2.2605	0.243493	0.165647
Q8EBG2	Diguanylate cyclase with GAF sensory domain OS=Shewanella oneidensis (strain MR-1) OX=211586 GN=SO_3556 PE=4 SV=1	-1.01845	-2.70265	0.665742	0.290608
Q8EEI0	30S ribosomal protein S1 OS=Shewanella oneidensis (strain MR-1) OX=211586 GN=rpsA PE=3 SV=1	-1.03394	-2.39094	0.323067	0.190352
Q8EE60	Peptide deformylase 3 OS=Shewanella oneidensis (strain MR-1) OX=211586 GN=def3 PE=3 SV=1	-1.03951	-3.61559	1.53656	0.450444
Q8EEI6	Uncharacterized protein OS=Shewanella oneidensis (strain MR-1) OX=211586 GN=SO_2396 PE=4 SV=1	-1.03972	-3.61579	1.53636	0.450444
Q8E8W6	Serine peptidase family S9 OS=Shewanella oneidensis (strain MR-1) OX=211586 GN=SO_4537 PE=4 SV=1	-1.04455	-2.63371	0.544597	0.259175
Q8ED70	DNA ligase OS=Shewanella oneidensis (strain MR-1) OX=211586 GN=ligA PE=3 SV=1	-1.04794	-3.86943	1.77355	0.512144
Q8EA09	MshA pili-associated adhesin MshQ OS=Shewanella oneidensis (strain MR-1) OX=211586 GN=mshQ PE=4 SV=1	-1.04905	-2.07759	-0.0205131	0.0914108
Q8EDU1	Mu phage transcriptional regulator Cro/CI family C OS=Shewanella oneidensis (strain MR-1) OX=211586 GN=C PE=4 SV=1	-1.05004	-3.24492	1.14484	0.388773
Q8E9Q1	Cell division protein FtsZ OS=Shewanella oneidensis (strain MR-1) OX=211586 GN=ftsZ PE=3 SV=1	-1.06154	-2.4084	0.285309	0.175838
Q8E8J5	DNA polymerase I OS=Shewanella oneidensis (strain MR-1) OX=211586 GN=polA PE=3 SV=1	-1.06803	-3.64411	1.50805	0.440112
Q8EKC9	T2aSS secretion system secretin GspD OS=Shewanella oneidensis (strain MR-1) OX=211586 GN=gspD PE=3 SV=1	-1.07539	-2.12374	-0.0270274	0.0897175
Q8ED68	Sulfate transporter CysZ OS=Shewanella oneidensis (strain MR-1) OX=211586 GN=cysZ PE=3 SV=1	-1.07737	-2.66681	0.512065	0.241124
Q8EHL6	Transcription termination/antitermination protein NusA OS=Shewanella oneidensis (strain MR-1) OX=211586 GN=nusA PE=3 SV=1	-1.09373	-2.54569	0.358226	0.194355
Q8EC32	4-hydroxy-3-methylbut-2-en-1-yl diphosphate synthase (flavodoxin) OS=Shewanella oneidensis (strain MR-1) OX=211586 GN=ispG PE=3 SV=1	-1.09915	-3.68504	1.48674	0.441686
Q8EHK6	Nucleoside-specific outer membrane porin OmpK OS=Shewanella oneidensis (strain MR-1) OX=211586 GN=ompK PE=4 SV=1	-1.10685	-3.00419	0.790502	0.317067
Q8EJZ3	Putrescine transporter PotE OS=Shewanella oneidensis (strain MR-1) OX=211586 GN=potE PE=3 SV=1	-1.10906	-2.56913	0.35101	0.19099
Q8EGU1	Bifunctional diguanylate cyclase with PAS sensory domains/diguanylate phosphodiesterase OS=Shewanella oneidensis (strain MR-1) OX=211586 GN=SO_1500 PE=4 SV=2	-1.10989	-3.28801	1.06823	0.361266
Q8EG35	Extracelllular iron oxide respiratory system periplasmic decaheme cytochrome c component MtrA OS=Shewanella oneidensis (strain MR-1) OX=211586 GN=mtrA PE=1 SV=1	-1.11931	-2.23161	-0.00700991	0.0937319
Q8EHI5	Purine transporter AzgA family OS=Shewanella oneidensis (strain MR-1) OX=211586 GN=SO_1236 PE=4 SV=1	-1.12363	-3.36772	1.12047	0.388589
Q8EII0	Histidine kinase OS=Shewanella oneidensis (strain MR-1) OX=211586 GN=SO_0859 PE=1 SV=1	-1.14365	-2.58301	0.295704	0.172835
Q8EIA9	Uncharacterized protein OS=Shewanella oneidensis (strain MR-1) OX=211586 GN=SO_0934 PE=4 SV=1	-1.14784	-3.28054	0.984864	0.355005
Q8ED15	Lambda phage major tail protein V OS=Shewanella oneidensis (strain MR-1) OX=211586 GN=V PE=4 SV=1	-1.15563	-2.30085	-0.0104047	0.0929321
Q8EB10	Sulfate adenylyltransferase subunit 1 OS=Shewanella oneidensis (strain MR-1) OX=211586 GN=cysN PE=3 SV=2	-1.16315	-3.15521	0.828903	0.299447
Q8EHQ4	UPF0250 protein SO_1163 OS=Shewanella oneidensis (strain MR-1) OX=211586 GN=SO_1163 PE=3 SV=1	-1.18006	-2.68183	0.321716	0.172835
Q8EE96	Pyruvate kinase OS=Shewanella oneidensis (strain MR-1) OX=211586 GN=pykA PE=3 SV=1	-1.19329	-2.57411	0.187534	0.141487
Q8EEP2	Negative modulator of initiation of replication OS=Shewanella oneidensis (strain MR-1) OX=211586 GN=seqA PE=3 SV=1	-1.19618	-3.19012	0.797765	0.293952
Q8EJC5	Uncharacterized protein OS=Shewanella oneidensis (strain MR-1) OX=211586 GN=SO_0542 PE=4 SV=1	-1.20086	-3.77694	1.37521	0.388773
Q8EK69	30S ribosomal protein S10 OS=Shewanella oneidensis (strain MR-1) OX=211586 GN=rpsJ PE=3 SV=1	-1.20329	-2.87386	0.467282	0.21439
Q8EAZ0	K(+)/H(+) antiporter NhaP2 OS=Shewanella oneidensis (strain MR-1) OX=211586 GN=nhaP2 PE=3 SV=1	-1.22113	-2.76952	0.327267	0.173871
Q8EH88	L-aspartate oxidase OS=Shewanella oneidensis (strain MR-1) OX=211586 GN=nadB PE=3 SV=1	-1.23637	-2.96276	0.490031	0.21426
Q8EER9	Threonine--tRNA ligase OS=Shewanella oneidensis (strain MR-1) OX=211586 GN=thrS PE=3 SV=1	-1.23899	-2.4629	-0.0150773	0.0926242
Q8ECV7	RNA binding protein YciO OS=Shewanella oneidensis (strain MR-1) OX=211586 GN=yciO PE=3 SV=1	-1.24504	-3.31357	0.823494	0.285886
Q8EFS2	Methylcrotonyl-CoA carboxylase biotin-binding subunit LiuD OS=Shewanella oneidensis (strain MR-1) OX=211586 GN=liuD PE=4 SV=1	-1.2475	-2.43833	-0.0566766	0.0842572
Q8EKN9	Glycerol-3-phosphate dehydrogenase [NAD(P)+] OS=Shewanella oneidensis (strain MR-1) OX=211586 GN=gpsA PE=3 SV=1	-1.24804	-3.38894	0.892871	0.307811
Q8EBS1	Alanine--tRNA ligase OS=Shewanella oneidensis (strain MR-1) OX=211586 GN=alaS PE=3 SV=1	-1.2501	-2.43447	-0.0657246	0.082715
Q8EA19	ABC-type efflux system secretin component OS=Shewanella oneidensis (strain MR-1) OX=211586 GN=SO_4090 PE=4 SV=1	-1.26069	-2.9415	0.420121	0.196354
Q8E8Y0	Coproporphyrinogen III oxidase oxygen-independent OS=Shewanella oneidensis (strain MR-1) OX=211586 GN=SO_4520 PE=4 SV=1	-1.2621	-2.90651	0.382304	0.187069
Q8ED58	Pyruvate formate-lyase PflB OS=Shewanella oneidensis (strain MR-1) OX=211586 GN=pflB PE=4 SV=1	-1.27722	-2.53649	-0.0179457	0.0923788
Q8EK80	Protein translocase subunit SecE OS=Shewanella oneidensis (strain MR-1) OX=211586 GN=secE PE=3 SV=1	-1.28622	-3.24847	0.676029	0.245486
Q8EAB9	Two component signal transduction system controlling aerobic respiration response regulator ArcA OS=Shewanella oneidensis (strain MR-1) OX=211586 GN=arcA PE=4 SV=1	-1.29459	-2.56852	-0.0206569	0.0920281
Q8EAX1	Uncharacterized protein OS=Shewanella oneidensis (strain MR-1) OX=211586 GN=SO_3770 PE=1 SV=1	-1.29643	-2.94736	0.354496	0.177113
Q8EFW4	Ribosomal RNA large subunit methyltransferase K/L OS=Shewanella oneidensis (strain MR-1) OX=211586 GN=rlmL PE=3 SV=1	-1.29678	-2.70608	0.11252	0.119946
Q8EJR7	Ribosomal protein L11 methyltransferase OS=Shewanella oneidensis (strain MR-1) OX=211586 GN=prmA PE=3 SV=1	-1.30355	-3.87963	1.27252	0.353744
Q8EGX8	Type I restriction-modification system restriction endonuclease DNA specificity subunit HsdS OS=Shewanella oneidensis (strain MR-1) OX=211586 GN=hsdS PE=4 SV=2	-1.3067	-3.34686	0.733459	0.263145
Q8EIQ4	DNA helicase OS=Shewanella oneidensis (strain MR-1) OX=211586 GN=SO_0783 PE=4 SV=1	-1.30676	-3.35002	0.736491	0.263672
Q8EJR4	Quinol:fumarate reductase FAD-binding subunit FrdA OS=Shewanella oneidensis (strain MR-1) OX=211586 GN=frdA PE=4 SV=1	-1.30906	-3.91599	1.29787	0.387239
Q8E8I4	CDP-glycerol glycerophosphotransferase family protein OS=Shewanella oneidensis (strain MR-1) OX=211586 GN=SO_4680 PE=4 SV=1	-1.32484	-2.36413	-0.285554	0.0447199
Q8EI34	NADH-quinone oxidoreductase subunit G OS=Shewanella oneidensis (strain MR-1) OX=211586 GN=nuoG PE=3 SV=1	-1.35057	-2.40127	-0.299863	0.0435766
Q8EIB0	Fructose-bisphosphate aldolase class II Calvin cycle subtype Fba OS=Shewanella oneidensis (strain MR-1) OX=211586 GN=fba PE=3 SV=1	-1.36687	-2.84967	0.115926	0.119946
Q8EBX9	Uncharacterized protein OS=Shewanella oneidensis (strain MR-1) OX=211586 GN=yggL PE=4 SV=1	-1.37056	-3.26012	0.518999	0.205057
Q8ECF2	UDP-N-acetyl-d-glucosamine 6-dehydrogenase WbpA OS=Shewanella oneidensis (strain MR-1) OX=211586 GN=wbpA PE=3 SV=1	-1.37165	-2.7456	0.0023047	0.0955118
Q8EHS6	Carbamoyl-phosphate synthase small chain OS=Shewanella oneidensis (strain MR-1) OX=211586 GN=carA PE=3 SV=1	-1.3721	-2.51033	-0.233869	0.0537438
Q8EAF7	UDP-N-acetylglucosamine 1-carboxyvinyltransferase OS=Shewanella oneidensis (strain MR-1) OX=211586 GN=murA PE=3 SV=1	-1.37714	-3.43898	0.684697	0.24347
Q8EE54	Acyl-CoA dehydrogenase FadE2 OS=Shewanella oneidensis (strain MR-1) OX=211586 GN=fadE2 PE=4 SV=1	-1.38379	-2.56166	-0.20592	0.0583667
Q8E978	GTP-binding protein BipA OS=Shewanella oneidensis (strain MR-1) OX=211586 GN=bipA PE=4 SV=1	-1.38797	-2.75258	-0.0233464	0.0920281
Q8EAT2	Outer membrane protein OmpA-like protein OS=Shewanella oneidensis (strain MR-1) OX=211586 GN=SO_3810 PE=4 SV=1	-1.39135	-3.95198	1.16928	0.351062
Q8ECH1	Polysaccharide biosynthesis protein epimerase/dehydratase-like WbfY OS=Shewanella oneidensis (strain MR-1) OX=211586 GN=wbfY PE=4 SV=1	-1.39285	-2.64879	-0.136914	0.0709685
Q8EER3	DNA translocase FtsK OS=Shewanella oneidensis (strain MR-1) OX=211586 GN=ftsK PE=3 SV=1	-1.39658	-2.88763	0.0944633	0.115348
Q8EEN1	Glyceraldehyde-3-phosphate dehydrogenase OS=Shewanella oneidensis (strain MR-1) OX=211586 GN=gapB PE=3 SV=1	-1.39734	-2.89513	0.100449	0.116279
Q8E800	S-(hydroxymethyl)glutathione dehydrogenase OS=Shewanella oneidensis (strain MR-1) OX=211586 GN=frmA PE=3 SV=1	-1.39946	-2.70496	-0.0939554	0.0788059
Q8EI60	Transcriptional regulator LysR family OS=Shewanella oneidensis (strain MR-1) OX=211586 GN=SO_0989 PE=4 SV=1	-1.40641	-3.87072	1.05789	0.310307
Q8EKR9	Fatty acid oxidation complex subunit alpha OS=Shewanella oneidensis (strain MR-1) OX=211586 GN=fadB PE=3 SV=1	-1.40687	-3.18749	0.373748	0.175074
Q8EG26	Glutamine--tRNA ligase OS=Shewanella oneidensis (strain MR-1) OX=211586 GN=glnS PE=3 SV=1	-1.40704	-3.98312	1.16903	0.318694
Q8EK51	50S ribosomal protein L15 OS=Shewanella oneidensis (strain MR-1) OX=211586 GN=rplO PE=3 SV=1	-1.41963	-2.75746	-0.0818109	0.0815008
Q8EGD9	UTP--glucose-1-phosphate uridylyltransferase OS=Shewanella oneidensis (strain MR-1) OX=211586 GN=galU PE=3 SV=1	-1.42422	-2.74986	-0.0985767	0.0787033
Q8EG13	ABC-type peptide uptake system ATPase component 2 SapF OS=Shewanella oneidensis (strain MR-1) OX=211586 GN=sapF PE=4 SV=1	-1.43061	-4.00668	1.14547	0.312285
Q8EET2	Sulfate transporter SulP family OS=Shewanella oneidensis (strain MR-1) OX=211586 GN=SO_2286 PE=3 SV=1	-1.45229	-3.31791	0.413329	0.175896
Q8EI33	NADH-quinone oxidoreductase subunit F OS=Shewanella oneidensis (strain MR-1) OX=211586 GN=nuoF PE=3 SV=1	-1.45317	-3.19144	0.285111	0.149273
Q8EAN3	Molybdenum import ATP-binding protein ModC OS=Shewanella oneidensis (strain MR-1) OX=211586 GN=modC PE=3 SV=1	-1.4559	-3.08814	0.176345	0.130666
Q8EBH3	Outer membrane porin OS=Shewanella oneidensis (strain MR-1) OX=211586 GN=SO_3545 PE=3 SV=2	-1.46075	-2.53916	-0.382329	0.0360267
Q8EHZ3	Lipoprotein with a tetratricopeptide repeat OS=Shewanella oneidensis (strain MR-1) OX=211586 GN=SO_1061 PE=4 SV=1	-1.46138	-2.64511	-0.277649	0.0499047
Q8EFS0	Methylcrotonyl-CoA carboxylase carboxyl transferase subunit LiuB OS=Shewanella oneidensis (strain MR-1) OX=211586 GN=liuB PE=4 SV=1	-1.46616	-3.1649	0.232577	0.139542
Q8EDJ9	Peptidoglycan-associated lipoprotein Pal OS=Shewanella oneidensis (strain MR-1) OX=211586 GN=pal PE=3 SV=1	-1.4669	-2.77344	-0.160356	0.0684384
Q8EE64	REG family ATPase YbiT OS=Shewanella oneidensis (strain MR-1) OX=211586 GN=ybiT PE=4 SV=1	-1.4739	-3.84192	0.894112	0.270159
Q8EJ90	Periplasmic metalloprotease OS=Shewanella oneidensis (strain MR-1) OX=211586 GN=SO_0578 PE=4 SV=1	-1.47493	-3.0195	0.0696437	0.108892
Q8EER8	Translation initiation factor IF-3 OS=Shewanella oneidensis (strain MR-1) OX=211586 GN=infC PE=3 SV=3	-1.47581	-3.33422	0.382598	0.169084
Q8E9X9	Uridine phosphorylase OS=Shewanella oneidensis (strain MR-1) OX=211586 GN=udp PE=1 SV=1	-1.492	-2.6685	-0.315502	0.0453025
K4PSJ4	Flagellar hook-filament junction protein FlgK OS=Shewanella oneidensis (strain MR-1) OX=211586 GN=flgK PE=3 SV=1	-1.49444	-2.93121	-0.0576595	0.0856977
Q8EAG3	30S ribosomal protein S9 OS=Shewanella oneidensis (strain MR-1) OX=211586 GN=rpsI PE=3 SV=1	-1.49548	-3.08101	0.0900506	0.113066
Q8EFZ3	Outer membrane porin OS=Shewanella oneidensis (strain MR-1) OX=211586 GN=SO_1821 PE=4 SV=1	-1.50363	-3.49031	0.483043	0.192614
Q8EB70	Long chain fatty acid CoA ligase FadD OS=Shewanella oneidensis (strain MR-1) OX=211586 GN=fadD PE=4 SV=1	-1.50482	-3.24839	0.238745	0.14107
Q8EIJ7	Elongation factor G 2 OS=Shewanella oneidensis (strain MR-1) OX=211586 GN=fusB PE=3 SV=1	-1.51242	-3.14339	0.11854	0.117882
Q8EDP9	Mu phage tail tube protein GpM OS=Shewanella oneidensis (strain MR-1) OX=211586 GN=gpM PE=4 SV=1	-1.53876	-2.83877	-0.238761	0.0571774
Q8EGE0	UDP-glucose 4-epimerase GalE OS=Shewanella oneidensis (strain MR-1) OX=211586 GN=galE PE=4 SV=1	-1.54153	-4.29986	1.21681	0.318694
Q8EHS5	Carbamoyl-phosphate synthase large chain OS=Shewanella oneidensis (strain MR-1) OX=211586 GN=carB PE=3 SV=1	-1.56158	-2.81372	-0.309429	0.0479892
Q8EK40	Cytochrome c biogenesis ATP-binding export protein CcmA OS=Shewanella oneidensis (strain MR-1) OX=211586 GN=ccmA PE=3 SV=1	-1.56237	-3.32868	0.203946	0.132644
Q8EK64	30S ribosomal protein S19 OS=Shewanella oneidensis (strain MR-1) OX=211586 GN=rpsS PE=3 SV=1	-1.58953	-3.3865	0.207436	0.133464
Q8EI32	NADH-ubiquinone oxidoreductase subunit E NuoE OS=Shewanella oneidensis (strain MR-1) OX=211586 GN=nuoE PE=4 SV=1	-1.60323	-3.65431	0.447844	0.172075
Q8EHT7	Chaperone protein DnaK OS=Shewanella oneidensis (strain MR-1) OX=211586 GN=dnaK PE=3 SV=1	-1.6083	-3.19114	-0.025464	0.0920281
Q8ECD6	Chemotaxis signal transduction system histidine kinase CheA OS=Shewanella oneidensis (strain MR-1) OX=211586 GN=cheA PE=4 SV=1	-1.62302	-3.07452	-0.171519	0.069702
Q8EBY2	Transcriptional regulator LysR family OS=Shewanella oneidensis (strain MR-1) OX=211586 GN=SO_3363 PE=4 SV=1	-1.62758	-3.53881	0.283642	0.14337
Q8ED55	Acetate kinase OS=Shewanella oneidensis (strain MR-1) OX=211586 GN=ackA PE=3 SV=1	-1.62893	-2.93099	-0.32687	0.047651
Q8EI84	Spermine/spermidine synthase family protein OS=Shewanella oneidensis (strain MR-1) OX=211586 GN=SO_0960 PE=4 SV=1	-1.63004	-3.61142	0.351341	0.15266
Q8EC88	Outer membrane lipoprotein required for flagellar motility FlgP OS=Shewanella oneidensis (strain MR-1) OX=211586 GN=flgP PE=4 SV=1	-1.63038	-3.71054	0.449777	0.177618
Q8EDG8	Uncharacterized protein OS=Shewanella oneidensis (strain MR-1) OX=211586 GN=SO_2781 PE=4 SV=1	-1.63312	-3.23871	-0.0275248	0.0920281
Q8EIS9	Phospho-2-dehydro-3-deoxyheptonate aldolase OS=Shewanella oneidensis (strain MR-1) OX=211586 GN=aroG PE=3 SV=1	-1.64713	-3.95502	0.660768	0.212165
Q8EJ79	Small ribosomal subunit biogenesis GTPase RsgA OS=Shewanella oneidensis (strain MR-1) OX=211586 GN=rsgA PE=3 SV=1	-1.65414	-3.61294	0.304665	0.143945
Q8EFE8	Uncharacterized protein OS=Shewanella oneidensis (strain MR-1) OX=211586 GN=SO_2027 PE=4 SV=2	-1.66775	-3.82807	0.492582	0.175838
Q8EJR3	Quinol:fumarate reductase FeS subunit FrdB OS=Shewanella oneidensis (strain MR-1) OX=211586 GN=frdB PE=4 SV=1	-1.66918	-3.78457	0.446222	0.171883
Q8ED54	Phosphate acetyltransferase OS=Shewanella oneidensis (strain MR-1) OX=211586 GN=pta PE=3 SV=1	-1.67903	-3.40246	0.0443985	0.102451
Q8EB02	Biosynthetic peptidoglycan transglycosylase OS=Shewanella oneidensis (strain MR-1) OX=211586 GN=mtgA PE=3 SV=2	-1.68501	-3.70434	0.33432	0.148378
Q8EFF4	Ferrochelatase 1 OS=Shewanella oneidensis (strain MR-1) OX=211586 GN=hemH1 PE=3 SV=2	-1.69142	-3.15749	-0.225349	0.0643408
Q8EGQ7	Isocitrate dehydrogenase NAD-dependent OS=Shewanella oneidensis (strain MR-1) OX=211586 GN=SO_1538 PE=4 SV=1	-1.69196	-3.04312	-0.340807	0.0475297
Q8EF55	Aldehyde-alcohol dehydrogenase OS=Shewanella oneidensis (strain MR-1) OX=211586 GN=adhE PE=3 SV=1	-1.7013	-3.784	0.3814	0.155117
Q8EAI5	Replicative DNA helicase OS=Shewanella oneidensis (strain MR-1) OX=211586 GN=dnaB PE=3 SV=1	-1.70238	-3.96197	0.557208	0.185492
Q8EDI9	Uracil phosphoribosyltransferase OS=Shewanella oneidensis (strain MR-1) OX=211586 GN=upp PE=3 SV=1	-1.71134	-3.65586	0.233176	0.134939
Q8E8D5	Coproporphyrinogen-III oxidase OS=Shewanella oneidensis (strain MR-1) OX=211586 GN=hemN PE=3 SV=1	-1.71822	-3.5342	0.097766	0.112155
Q8E9Z7	MSHA system outer membrane secretin MshL OS=Shewanella oneidensis (strain MR-1) OX=211586 GN=mshL PE=4 SV=1	-1.72208	-2.81095	-0.633213	0.0204136
Q8EC06	Outer membrane porin OmpA family OS=Shewanella oneidensis (strain MR-1) OX=211586 GN=SO_3339 PE=3 SV=1	-1.72352	-3.14496	-0.302073	0.0526313
Q8EGC1	3-hydroxyacyl-CoA dehydrogenase IvdG OS=Shewanella oneidensis (strain MR-1) OX=211586 GN=ivdG PE=4 SV=1	-1.7323	-3.63749	0.172887	0.124083
Q8EK81	Elongation factor Tu 1 OS=Shewanella oneidensis (strain MR-1) OX=211586 GN=tuf1 PE=3 SV=1	-1.73387	-4.21437	0.746637	0.215969
Q8EJM8	Uroporphyrinogen decarboxylase OS=Shewanella oneidensis (strain MR-1) OX=211586 GN=hemE PE=3 SV=1	-1.74669	-3.4774	-0.0159815	0.0929321
Q8EK53	50S ribosomal protein L18 OS=Shewanella oneidensis (strain MR-1) OX=211586 GN=rplR PE=3 SV=1	-1.75449	-6.94941	3.44043	0.55903
Q8EJ18	Mu phage protein OS=Shewanella oneidensis (strain MR-1) OX=211586 GN=SO_0655 PE=4 SV=1	-1.75679	-3.39193	-0.121649	0.0787033
Q8EDH3	3-oxoacyl-(Acyl-carrier-protein) reductase FabG OS=Shewanella oneidensis (strain MR-1) OX=211586 GN=fabG PE=4 SV=1	-1.76444	-3.43364	-0.0952317	0.083138
Q8EJ95	Uncharacterized protein OS=Shewanella oneidensis (strain MR-1) OX=211586 GN=SO_0573 PE=4 SV=2	-1.77616	-3.76464	0.212323	0.130532
Q8EDC4	ATP-dependent RNA helicase DEAD box family OS=Shewanella oneidensis (strain MR-1) OX=211586 GN=SO_2838 PE=3 SV=1	-1.78894	-3.29628	-0.281605	0.0573581
Q8EDI8	Phosphoribosylformylglycinamidine cyclo-ligase OS=Shewanella oneidensis (strain MR-1) OX=211586 GN=purM PE=3 SV=2	-1.79042	-3.58432	0.00348971	0.0955118
Q8EFT9	Thioredoxin-dependent thiol peroxidase Bcp OS=Shewanella oneidensis (strain MR-1) OX=211586 GN=bcp PE=4 SV=1	-1.79907	-4.4048	0.806659	0.227341
Q8EBT2	Peptidyl-prolyl cis-trans isomerase OS=Shewanella oneidensis (strain MR-1) OX=211586 GN=slyD PE=3 SV=1	-1.80179	-3.16974	-0.433839	0.0410335
Q8E9Q5	Protein translocase subunit SecA OS=Shewanella oneidensis (strain MR-1) OX=211586 GN=secA PE=3 SV=1	-1.80293	-2.96433	-0.641531	0.0215244
Q8E8N3	Transcriptional accessory protein Tex OS=Shewanella oneidensis (strain MR-1) OX=211586 GN=tex PE=4 SV=1	-1.80717	-4.30936	0.695012	0.202
Q8EA43	Phosphoribosylaminoimidazole-succinocarboxamide synthase OS=Shewanella oneidensis (strain MR-1) OX=211586 GN=purC PE=3 SV=1	-1.82034	-3.29591	-0.344773	0.0508207
Q8ECF9	Perosamine synthetase-related protein OS=Shewanella oneidensis (strain MR-1) OX=211586 GN=SO_3183 PE=3 SV=1	-1.82161	-3.2154	-0.427819	0.0410268
Q8EG81	Phosphate-specific transport system accessory protein PhoU OS=Shewanella oneidensis (strain MR-1) OX=211586 GN=phoU PE=3 SV=1	-1.8231	-3.86574	0.219538	0.128752
Q8ED35	Oxidoreductase short-chain dehydrogenase/reductase family OS=Shewanella oneidensis (strain MR-1) OX=211586 GN=SO_2935 PE=4 SV=1	-1.82462	-3.37119	-0.278057	0.0583667
Q8EI82	Uncharacterized protein OS=Shewanella oneidensis (strain MR-1) OX=211586 GN=SO_0962 PE=4 SV=1	-1.83559	-3.81494	0.143756	0.116143
Q8EHL4	Ribosome-binding factor A OS=Shewanella oneidensis (strain MR-1) OX=211586 GN=rbfA PE=3 SV=1	-1.83592	-4.41199	0.740156	0.201512
Q8ECS1	DNA topoisomerase 3 OS=Shewanella oneidensis (strain MR-1) OX=211586 GN=topB PE=3 SV=1	-1.84124	-3.95156	0.269082	0.134134
Q8EJA8	MaoC domain protein OS=Shewanella oneidensis (strain MR-1) OX=211586 GN=SO_0559 PE=4 SV=1	-1.84657	-4.10491	0.411769	0.154897
Q8E8Z4	Iron-sulfur cluster-binding protein OS=Shewanella oneidensis (strain MR-1) OX=211586 GN=SO_4506 PE=4 SV=1	-1.84773	-3.8442	0.14875	0.116394
Q8EIB4	S-adenosylmethionine synthase OS=Shewanella oneidensis (strain MR-1) OX=211586 GN=metK PE=3 SV=1	-1.85462	-3.85181	0.142563	0.116952
Q8EIM3	TonB-dependent vitamin B12 receptor BtuB OS=Shewanella oneidensis (strain MR-1) OX=211586 GN=btuB PE=3 SV=1	-1.85785	-4.01849	0.302786	0.142973
Q8E8D7	Der GTPase-activating protein YihI OS=Shewanella oneidensis (strain MR-1) OX=211586 GN=yihI PE=3 SV=1	-1.87365	-3.35651	-0.390787	0.0471329
Q8EBQ9	CTP synthase OS=Shewanella oneidensis (strain MR-1) OX=211586 GN=pyrG PE=3 SV=1	-1.87452	-3.50109	-0.247956	0.062497
Q8EDG6	Ribonuclease E OS=Shewanella oneidensis (strain MR-1) OX=211586 GN=rne PE=3 SV=1	-1.89256	-3.31443	-0.470699	0.0381271
Q8E9R5	Probable protein kinase UbiB OS=Shewanella oneidensis (strain MR-1) OX=211586 GN=ubiB PE=3 SV=1	-1.89594	-3.23367	-0.558206	0.0301268
Q8EJ43	TonB-dependent copper receptor NosA OS=Shewanella oneidensis (strain MR-1) OX=211586 GN=nosA PE=3 SV=1	-1.91702	-3.66111	-0.172927	0.0745896
Q8EH73	Signal recognition particle protein OS=Shewanella oneidensis (strain MR-1) OX=211586 GN=ffh PE=3 SV=1	-1.91988	-3.22868	-0.611078	0.0276775
Q8E9A6	FAD-binding protein OS=Shewanella oneidensis (strain MR-1) OX=211586 GN=SO_4378 PE=4 SV=1	-1.92559	-4.19307	0.341885	0.143996
Q8EJV1	AMP-dependent synthetase and ligase family protein OS=Shewanella oneidensis (strain MR-1) OX=211586 GN=SO_0355 PE=4 SV=1	-1.93401	-3.17538	-0.69264	0.0212975
Q8EFZ2	TonB-dependent receptor OS=Shewanella oneidensis (strain MR-1) OX=211586 GN=SO_1822 PE=3 SV=1	-1.93999	-5.61884	1.73887	0.346391
Q8EEJ1	Phosphatidylserine synthase PssA OS=Shewanella oneidensis (strain MR-1) OX=211586 GN=pssA PE=4 SV=1	-1.94473	-3.06951	-0.819949	0.0144543
Q8EBU6	Ribosome-associated inhibitor A RaiA OS=Shewanella oneidensis (strain MR-1) OX=211586 GN=raiA PE=4 SV=1	-1.95018	-3.19199	-0.708369	0.0208721
Q8EDV7	Cupin 4 family protein OS=Shewanella oneidensis (strain MR-1) OX=211586 GN=SO_2636 PE=4 SV=1	-1.95126	-3.64753	-0.254992	0.0639248
Q8EFR9	Isovaleryl-CoA dehydrogenase LiuA OS=Shewanella oneidensis (strain MR-1) OX=211586 GN=liuA PE=3 SV=1	-1.95196	-3.35106	-0.552861	0.0333032
Q8EHL5	Translation initiation factor IF-2 OS=Shewanella oneidensis (strain MR-1) OX=211586 GN=infB PE=3 SV=1	-1.95914	-3.35536	-0.562908	0.0313845
Q8EF25	Nucleoid-associated protein SO_2177 OS=Shewanella oneidensis (strain MR-1) OX=211586 GN=SO_2177 PE=3 SV=1	-1.96017	-3.94828	0.0279428	0.0987034
Q8EFP4	Citrate synthase OS=Shewanella oneidensis (strain MR-1) OX=211586 GN=gltA PE=3 SV=1	-1.97269	-3.67972	-0.265654	0.0618631
Q8EH63	Multifunctional chorismate mutase P/prephenate dehydratase/DAHP synthetase PheA OS=Shewanella oneidensis (strain MR-1) OX=211586 GN=pheA PE=4 SV=1	-1.97527	-3.94078	-0.00976052	0.0940821
Q8EJJ6	DNA helicase OS=Shewanella oneidensis (strain MR-1) OX=211586 GN=uvrD PE=3 SV=1	-1.98134	-3.70632	-0.256365	0.0652628
Q8E8C7	1,4-dihydroxy-2-naphthoyl-CoA synthase OS=Shewanella oneidensis (strain MR-1) OX=211586 GN=menB PE=3 SV=1	-1.98332	-3.94221	-0.0244285	0.0927004
Q8EJJ0	Uncharacterized protein OS=Shewanella oneidensis (strain MR-1) OX=211586 GN=SO_0474 PE=4 SV=1	-1.98382	-4.55989	0.592257	0.172835
Q8EC68	Outer membrane protein FadL family OS=Shewanella oneidensis (strain MR-1) OX=211586 GN=SO_3276 PE=4 SV=1	-1.99078	-3.95666	-0.0249038	0.0927004
Q8EFN9	Dihydrolipoyllysine-residue succinyltransferase component of 2-oxoglutarate dehydrogenase complex OS=Shewanella oneidensis (strain MR-1) OX=211586 GN=sucB PE=3 SV=1	-2.01078	-3.2056	-0.815962	0.0156255
Q8EDW9	Outer membrane protein SlyB-like protein OS=Shewanella oneidensis (strain MR-1) OX=211586 GN=SO_2622 PE=4 SV=1	-2.01494	-3.18296	-0.846926	0.0145099
Q8EGC6	Methylmalonate-semialdehyde dehydrogenase IvdB OS=Shewanella oneidensis (strain MR-1) OX=211586 GN=ivdB PE=4 SV=1	-2.01667	-3.66861	-0.36473	0.0524528
Q8ECA4	Flagellar hook-associated protein FlgL OS=Shewanella oneidensis (strain MR-1) OX=211586 GN=flgL PE=4 SV=1	-2.02081	-3.462	-0.579619	0.0314292
Q8EJQ9	Predicted outer membrane protein OS=Shewanella oneidensis (strain MR-1) OX=211586 GN=SO_0403 PE=4 SV=1	-2.02322	-3.84841	-0.19804	0.0709859
Q8EAG2	50S ribosomal protein L13 OS=Shewanella oneidensis (strain MR-1) OX=211586 GN=rplM PE=3 SV=1	-2.02775	-3.77968	-0.27582	0.0615504
Q8EA29	Outer membrane lipoprotein intimin-like protein OS=Shewanella oneidensis (strain MR-1) OX=211586 GN=SO_4080 PE=4 SV=1	-2.02835	-3.3295	-0.727191	0.0212975
Q8E8A9	tRNA uridine 5-carboxymethylaminomethyl modification enzyme MnmG OS=Shewanella oneidensis (strain MR-1) OX=211586 GN=mnmG PE=3 SV=1	-2.02879	-4.70188	0.644307	0.189722
Q8EH04	Extracellular dimethyl sulfoxide/manganese oxide reductase outer membrane translocase DmsF OS=Shewanella oneidensis (strain MR-1) OX=211586 GN=dmsF PE=4 SV=1	-2.03632	-3.19605	-0.876599	0.0138371
Q8E8I5	Glycosyl transferase family 4 WabH OS=Shewanella oneidensis (strain MR-1) OX=211586 GN=wabH PE=4 SV=1	-2.05266	-3.11103	-0.994297	0.0106035
Q8EDK4	Proline-responsive two component signal transduction system hybrid histidine kinase/resposne regulator PrlS OS=Shewanella oneidensis (strain MR-1) OX=211586 GN=prlS PE=4 SV=1	-2.06415	-4.43193	0.303638	0.134134
Q8CVD4	Extracellular iron oxide respiratory system outer membrane component MtrB OS=Shewanella oneidensis (strain MR-1) OX=211586 GN=mtrB PE=1 SV=1	-2.06842	-3.37186	-0.764977	0.020387
P59124	30S ribosomal protein S5 OS=Shewanella oneidensis (strain MR-1) OX=211586 GN=rpsE PE=3 SV=1	-2.0782	-3.71092	-0.445479	0.0448654
Q8E8R8	Uncharacterized protein OS=Shewanella oneidensis (strain MR-1) OX=211586 GN=SO_4593 PE=4 SV=1	-2.07862	-3.81877	-0.338473	0.0573581
Q8E8Q9	Glycerol-3-phosphate acyltransferase OS=Shewanella oneidensis (strain MR-1) OX=211586 GN=plsB PE=3 SV=1	-2.09672	-3.17334	-1.02009	0.0105407
Q8ECL2	ATP-dependent RNA helicase DEAD box family OS=Shewanella oneidensis (strain MR-1) OX=211586 GN=SO_3125 PE=3 SV=1	-2.1086	-4.34294	0.12574	0.112125
Q8EH70	50S ribosomal protein L19 OS=Shewanella oneidensis (strain MR-1) OX=211586 GN=rplS PE=3 SV=1	-2.1134	-3.27843	-0.948371	0.0126606
Q8EGC7	3-ketoacyl-CoA thiolase IvdA OS=Shewanella oneidensis (strain MR-1) OX=211586 GN=ivdA PE=3 SV=1	-2.12037	-3.37474	-0.865992	0.0153009
Q8EKI3	Zn-dependent protease with chaperone function OS=Shewanella oneidensis (strain MR-1) OX=211586 GN=SO_0110 PE=4 SV=1	-2.12312	-3.52417	-0.722072	0.0248912
Q8EFF6	Heat shock response protein OS=Shewanella oneidensis (strain MR-1) OX=211586 GN=SO_2017 PE=4 SV=1	-2.13937	-4.71545	0.436701	0.146693
Q8ECF3	UDP-GlkcNAc C4 epimerase WbpP OS=Shewanella oneidensis (strain MR-1) OX=211586 GN=wbpP PE=4 SV=1	-2.14	-4.21187	-0.0681372	0.0886881
Q8E844	Plasmid partition protein ParA OS=Shewanella oneidensis (strain MR-1) OX=211586 GN=parA PE=4 SV=1	-2.16154	-4.22392	-0.0991561	0.0842866
Q8EAL2	Energy taxis-modulating methyl accepting sensory transducer with hemerythrin sensory domain OS=Shewanella oneidensis (strain MR-1) OX=211586 GN=SO_3890 PE=4 SV=1	-2.1617	-3.29945	-1.02395	0.0110209
Q8EK78	50S ribosomal protein L11 OS=Shewanella oneidensis (strain MR-1) OX=211586 GN=rplK PE=3 SV=1	-2.16253	-3.71698	-0.608094	0.0323728
Q8EAR9	2-dehydro-3-deoxyphosphooctonate aldolase OS=Shewanella oneidensis (strain MR-1) OX=211586 GN=kdsA PE=3 SV=1	-2.17994	-4.01407	-0.345802	0.0572522
Q8EGH1	Ditrans,polycis-undecaprenyl-diphosphate synthase ((2E,6E)-farnesyl-diphosphate specific) OS=Shewanella oneidensis (strain MR-1) OX=211586 GN=uppS PE=3 SV=1	-2.21473	-4.79081	0.361345	0.136276
Q8EC97	Flagellar hook protein FlgE OS=Shewanella oneidensis (strain MR-1) OX=211586 GN=flgE PE=3 SV=1	-2.21736	-3.62018	-0.814552	0.0204136
Q8EC59	Cytochrome d ubiquinol oxidase subunit II CydB OS=Shewanella oneidensis (strain MR-1) OX=211586 GN=cydB PE=4 SV=1	-2.21755	-3.64234	-0.792757	0.0213229
Q8EK98	Fatty acid desaturase Ole1 OS=Shewanella oneidensis (strain MR-1) OX=211586 GN=oel1 PE=4 SV=1	-2.22345	-4.18519	-0.261713	0.0688974
Q8EDX4	Uridine kinase OS=Shewanella oneidensis (strain MR-1) OX=211586 GN=udk PE=3 SV=1	-2.23379	-4.06788	-0.399704	0.052803
Q8E961	Two component signal transduction system response regulator OmpR family OS=Shewanella oneidensis (strain MR-1) OX=211586 GN=SO_4428 PE=4 SV=1	-2.24952	-4.36063	-0.1384	0.0820311
Q8ECA8	Flagellar hook-associated protein 2 OS=Shewanella oneidensis (strain MR-1) OX=211586 GN=fliD PE=3 SV=1	-2.24981	-3.53039	-0.969239	0.0138371
Q8E9L4	Ribonuclease PH OS=Shewanella oneidensis (strain MR-1) OX=211586 GN=rph PE=3 SV=1	-2.25448	-3.95092	-0.558045	0.0412928
Q8EE19	ATP-dependent RNA helicase DEAD box family OS=Shewanella oneidensis (strain MR-1) OX=211586 GN=SO_2571 PE=3 SV=1	-2.26169	-4.74627	0.222881	0.122114
Q8EIQ6	Glycine dehydrogenase (decarboxylating) OS=Shewanella oneidensis (strain MR-1) OX=211586 GN=gcvP PE=3 SV=1	-2.26668	-3.74662	-0.786731	0.0227291
Q8EJT0	Type I restriction-modification system restriction endonuclease DNA specificity subunit HsdS OS=Shewanella oneidensis (strain MR-1) OX=211586 GN=hsdS PE=4 SV=1	-2.27173	-5.00085	0.457395	0.148847
Q8EK30	Phosphoenolpyruvate carboxylase OS=Shewanella oneidensis (strain MR-1) OX=211586 GN=ppc PE=3 SV=1	-2.30154	-4.60476	0.001676	0.0953619
Q8EE82	Bifunctional diguanylate cyclase/phosphodiesterase OS=Shewanella oneidensis (strain MR-1) OX=211586 GN=SO_2507 PE=4 SV=1	-2.31683	-4.44949	-0.184181	0.0763342
Q8EHA1	Transcriptional regulator of oxidative stress OxyR OS=Shewanella oneidensis (strain MR-1) OX=211586 GN=oxyR PE=4 SV=1	-2.31708	-4.89316	0.258993	0.122802
Q8EE03	Delta-aminolevulinic acid dehydratase OS=Shewanella oneidensis (strain MR-1) OX=211586 GN=hemB PE=3 SV=1	-2.3228	-3.95876	-0.686828	0.0299787
Q8E995	Uncharacterized protein OS=Shewanella oneidensis (strain MR-1) OX=211586 GN=SO_4391 PE=4 SV=2	-2.32896	-4.37608	-0.281832	0.0684384
Q8EF95	NiFe hydrogenase accessory/formation protein HypE OS=Shewanella oneidensis (strain MR-1) OX=211586 GN=hypE PE=4 SV=1	-2.33091	-4.48681	-0.175021	0.0788059
Q8EAG5	Adenylosuccinate synthetase OS=Shewanella oneidensis (strain MR-1) OX=211586 GN=purA PE=3 SV=1	-2.33671	-3.76857	-0.904845	0.017954
Q8EGN2	Outer membrane protein YfaZ OS=Shewanella oneidensis (strain MR-1) OX=211586 GN=yfaZ PE=4 SV=1	-2.33762	-4.28983	-0.385417	0.0550869
Q8EIH8	tRNA-modifying protein YgfZ OS=Shewanella oneidensis (strain MR-1) OX=211586 GN=ygfZ PE=3 SV=1	-2.35738	-4.35748	-0.35728	0.0613539
Q8EH80	GTPase Era OS=Shewanella oneidensis (strain MR-1) OX=211586 GN=era PE=3 SV=1	-2.36719	-4.48595	-0.248419	0.0708445
Q8EB81	50S ribosomal protein L27 OS=Shewanella oneidensis (strain MR-1) OX=211586 GN=rpmA PE=3 SV=1	-2.37919	-4.95527	0.196882	0.116143
Q8EDN8	DNA topoisomerase 1 OS=Shewanella oneidensis (strain MR-1) OX=211586 GN=topA PE=3 SV=1	-2.37948	-4.6402	-0.118751	0.0833723
Q8EK62	50S ribosomal protein L16 OS=Shewanella oneidensis (strain MR-1) OX=211586 GN=rplP PE=3 SV=1	-2.38276	-3.57074	-1.19479	0.0100136
Q8EBR9	DNA mismatch repair protein MutS OS=Shewanella oneidensis (strain MR-1) OX=211586 GN=mutS PE=3 SV=1	-2.38871	-4.72376	-0.0536601	0.0905203
Q8EF84	Uncharacterized protein OS=Shewanella oneidensis (strain MR-1) OX=211586 GN=SO_2102 PE=4 SV=1	-2.39653	-4.38951	-0.403558	0.0575668
Q8EGK0	Omega-3 polyunsaturated fatty acid synthase subunit PfaA OS=Shewanella oneidensis (strain MR-1) OX=211586 GN=pfaA PE=4 SV=1	-2.39774	-3.69305	-1.10243	0.0127275
Q8EC29	Dual-specificity RNA methyltransferase RlmN OS=Shewanella oneidensis (strain MR-1) OX=211586 GN=rlmN PE=3 SV=1	-2.40348	-4.77418	-0.0327725	0.0926242
Q8EA79	UvrABC system protein A OS=Shewanella oneidensis (strain MR-1) OX=211586 GN=uvrA PE=3 SV=1	-2.40363	-4.91248	0.105216	0.107546
Q8EHQ5	Octanoyltransferase OS=Shewanella oneidensis (strain MR-1) OX=211586 GN=lipB PE=3 SV=2	-2.41059	-4.69729	-0.123883	0.0837153
Q8EB80	50S ribosomal protein L21 OS=Shewanella oneidensis (strain MR-1) OX=211586 GN=rplU PE=3 SV=1	-2.41312	-4.07114	-0.7551	0.0273474
Q8EA11	Cell wall structural complex component MreB OS=Shewanella oneidensis (strain MR-1) OX=211586 GN=mreB PE=4 SV=1	-2.42781	-4.15424	-0.70137	0.0310978
Q8EHK7	Nucleoside permease OS=Shewanella oneidensis (strain MR-1) OX=211586 GN=SO_1214 PE=3 SV=1	-2.44176	-4.23379	-0.649726	0.0362388
Q8EHN4	Ribosome-binding ATPase YchF OS=Shewanella oneidensis (strain MR-1) OX=211586 GN=ychF PE=3 SV=1	-2.44206	-4.80238	-0.0817303	0.0872066
Q8E9K6	Type I restriction-modification system N6-adenine DNA methyltransferase HsdM OS=Shewanella oneidensis (strain MR-1) OX=211586 GN=hsdM PE=4 SV=1	-2.45173	-5.23894	0.33548	0.134134
Q8EER4	Leucine-responsive regulatory protein Lrp OS=Shewanella oneidensis (strain MR-1) OX=211586 GN=lrp PE=4 SV=1	-2.45689	-4.66096	-0.25283	0.069702
Q8E9V2	Lysine-N-methylase FliUV OS=Shewanella oneidensis (strain MR-1) OX=211586 GN=fliUV PE=4 SV=1	-2.46031	-5.9104	0.989781	0.21233
Q8ECA5	Flagellin OS=Shewanella oneidensis (strain MR-1) OX=211586 GN=fliC PE=3 SV=1	-2.46759	-3.90583	-1.02935	0.0146626
Q8EK67	50S ribosomal protein L4 OS=Shewanella oneidensis (strain MR-1) OX=211586 GN=rplD PE=3 SV=1	-2.47108	-4.16011	-0.782054	0.0269103
Q8EIH7	D-3-phosphoglycerate dehydrogenase SerA OS=Shewanella oneidensis (strain MR-1) OX=211586 GN=serA PE=3 SV=1	-2.47313	-4.18205	-0.764213	0.0277332
K4PU25	Pseudouridine synthase OS=Shewanella oneidensis (strain MR-1) OX=211586 GN=rluC PE=3 SV=1	-2.49335	-4.7775	-0.209202	0.0763342
Q8EH47	ATP-dependent RNA helicase DEAD box family OS=Shewanella oneidensis (strain MR-1) OX=211586 GN=SO_1383 PE=3 SV=1	-2.49509	-4.31945	-0.670723	0.0373169
Q8EK79	Transcription termination/antitermination protein NusG OS=Shewanella oneidensis (strain MR-1) OX=211586 GN=nusG PE=3 SV=1	-2.50142	-3.95352	-1.04932	0.014522
Q8ECL3	Dual specificity protein-tyrosine phosphatase OS=Shewanella oneidensis (strain MR-1) OX=211586 GN=SO_3124 PE=4 SV=1	-2.50614	-5.08221	0.0699361	0.102067
Q8ECF4	dTDP-glucose-4,6-dehydratase RfbB OS=Shewanella oneidensis (strain MR-1) OX=211586 GN=rfbB PE=4 SV=1	-2.5182	-3.91905	-1.11735	0.0137539
Q8E8I2	Glycosyl transferase family 4 OS=Shewanella oneidensis (strain MR-1) OX=211586 GN=SO_4682 PE=4 SV=1	-2.52413	-4.29699	-0.75127	0.03252
Q8EAT9	Hypoxanthine phosphoribosyltransferase OS=Shewanella oneidensis (strain MR-1) OX=211586 GN=hprT PE=3 SV=1	-2.5263	-4.93992	-0.112686	0.0845296
Q8EAG1	Cell division protein ZapE OS=Shewanella oneidensis (strain MR-1) OX=211586 GN=zapE PE=3 SV=1	-2.53597	-4.43405	-0.637898	0.0405592
Q8EIG3	Aminopeptidase PepB OS=Shewanella oneidensis (strain MR-1) OX=211586 GN=pepB PE=3 SV=1	-2.54668	-4.17078	-0.92258	0.0219053
Q8ECA6	Flagellin OS=Shewanella oneidensis (strain MR-1) OX=211586 GN=fliC PE=3 SV=1	-2.56161	-3.75275	-1.37047	0.00857776
Q8EK55	30S ribosomal protein S8 OS=Shewanella oneidensis (strain MR-1) OX=211586 GN=rpsH PE=3 SV=1	-2.56447	-3.90981	-1.21913	0.0108409
Q8EE97	2-keto-3-deoxy-6-phosphogluconate-responsive transcriptional regulator of central carbohydrate metabolism HexR OS=Shewanella oneidensis (strain MR-1) OX=211586 GN=hexR PE=4 SV=1	-2.56823	-4.03275	-1.1037	0.0138371
Q8EAW7	Bifunctional protein PutA OS=Shewanella oneidensis (strain MR-1) OX=211586 GN=putA PE=3 SV=1	-2.5746	-3.67286	-1.47635	0.00730936
Q8EAQ9	Ribose-phosphate pyrophosphokinase OS=Shewanella oneidensis (strain MR-1) OX=211586 GN=prs PE=3 SV=1	-2.58154	-4.21509	-0.947994	0.0204136
Q8EJQ7	Transcription termination factor Rho OS=Shewanella oneidensis (strain MR-1) OX=211586 GN=rho PE=3 SV=1	-2.58377	-3.99431	-1.17323	0.0123607
Q8EK99	Selenide, water dikinase OS=Shewanella oneidensis (strain MR-1) OX=211586 GN=selD PE=3 SV=1	-2.5849	-4.62706	-0.542742	0.0499047
Q8EK73	DNA-directed RNA polymerase subunit beta OS=Shewanella oneidensis (strain MR-1) OX=211586 GN=rpoC PE=3 SV=1	-2.58655	-3.9345	-1.2386	0.0108124
Q8EC87	Outer membrane lipoprotein required for flagellar motility FlgO OS=Shewanella oneidensis (strain MR-1) OX=211586 GN=flgO PE=4 SV=1	-2.60362	-4.10327	-1.10396	0.0142839
Q8EGY0	p-loop ATPase superfamily protein OS=Shewanella oneidensis (strain MR-1) OX=211586 GN=SO_1458 PE=4 SV=1	-2.60685	-4.58848	-0.625221	0.0446382
Q8EEV8	Transcription-repair-coupling factor OS=Shewanella oneidensis (strain MR-1) OX=211586 GN=mfd PE=3 SV=1	-2.61579	-6.66514	1.43357	0.259175
Q8EA89	p-loop containing nucleoside triphosphate hydrolase superfamily OS=Shewanella oneidensis (strain MR-1) OX=211586 GN=SO_4019 PE=4 SV=1	-2.62287	-4.63663	-0.609119	0.0441763
Q8EGS3	Respiratory FAD-dependent D-lactate dehydrogenase Dld OS=Shewanella oneidensis (strain MR-1) OX=211586 GN=dld PE=4 SV=2	-2.64993	-4.07612	-1.22374	0.0117559
Q8EK70	Elongation factor Tu 2 OS=Shewanella oneidensis (strain MR-1) OX=211586 GN=tuf2 PE=3 SV=1	-2.65614	-4.43796	-0.874324	0.0250914
Q8EJZ4	Outer membrane porin OS=Shewanella oneidensis (strain MR-1) OX=211586 GN=SO_0312 PE=4 SV=1	-2.66022	-4.74559	-0.574848	0.0446573
Q8E850	Uncharacterized protein OS=Shewanella oneidensis (strain MR-1) OX=211586 GN=SO_A0080 PE=4 SV=2	-2.6621	-4.61092	-0.713273	0.0360267
Q8E9F8	ATP-dependent DNA helicase Rep OS=Shewanella oneidensis (strain MR-1) OX=211586 GN=rep PE=3 SV=1	-2.70155	-5.77492	0.371808	0.133464
Q8EHG2	Transcriptional regulator LysR family OS=Shewanella oneidensis (strain MR-1) OX=211586 GN=SO_1259 PE=4 SV=1	-2.71027	-5.49575	0.0752158	0.102373
Q8EKT3	50S ribosomal protein L34 OS=Shewanella oneidensis (strain MR-1) OX=211586 GN=rpmH PE=3 SV=1	-2.72741	-8.56808	3.11325	0.409202
Q8EE00	Ribosome biogenesis GTPase A OS=Shewanella oneidensis (strain MR-1) OX=211586 GN=rbgA PE=3 SV=1	-2.77081	-4.70759	-0.834032	0.0320703
Q8EC51	Inosine-5-monophosphate dehydrogenase OS=Shewanella oneidensis (strain MR-1) OX=211586 GN=guaB PE=3 SV=1	-2.78735	-4.13762	-1.43708	0.0094081
Q8EKA4	3(2)5-bisphosphate nucleotidase CysQ OS=Shewanella oneidensis (strain MR-1) OX=211586 GN=cysQ PE=4 SV=1	-2.7947	-5.87083	0.281432	0.122713
Q8EGC5	2-methylbutanoyl-CoA dehydrogenase IvdC OS=Shewanella oneidensis (strain MR-1) OX=211586 GN=ivdC PE=3 SV=1	-2.79531	-4.79974	-0.790888	0.032112
Q8EKS9	DNA gyrase subunit B OS=Shewanella oneidensis (strain MR-1) OX=211586 GN=gyrB PE=3 SV=1	-2.81035	-4.86541	-0.755288	0.0347281
Q8EDZ7	Glutamate dehydrogenase (NAD+) Gdh OS=Shewanella oneidensis (strain MR-1) OX=211586 GN=gdh PE=4 SV=1	-2.83991	-4.03881	-1.641	0.00730936
Q8EDX3	Iron-sulfur cluster carrier protein OS=Shewanella oneidensis (strain MR-1) OX=211586 GN=apbC PE=3 SV=1	-2.842	-4.88921	-0.79479	0.0325876
Q8EB29	Nucleoside permease OS=Shewanella oneidensis (strain MR-1) OX=211586 GN=nupX PE=3 SV=1	-2.84799	-4.45199	-1.24399	0.0150328
Q8EKP6	Nitrite-sensitive transcriptional repressor NsrR OS=Shewanella oneidensis (strain MR-1) OX=211586 GN=nsrR PE=4 SV=1	-2.85667	-4.75911	-0.95423	0.0244722
Q8EFK9	4-hydroxyphenylpyruvate dioxygenase HppD OS=Shewanella oneidensis (strain MR-1) OX=211586 GN=hppD PE=4 SV=1	-2.88883	-5.67373	-0.10394	0.0867778
Q8EK46	50S ribosomal protein L17 OS=Shewanella oneidensis (strain MR-1) OX=211586 GN=rplQ PE=3 SV=1	-2.89568	-4.02058	-1.77078	0.0068204
Q8EGB5	REG family ATPase YbiT OS=Shewanella oneidensis (strain MR-1) OX=211586 GN=ybiT PE=4 SV=1	-2.90773	-4.87663	-0.938822	0.0307425
Q8EK48	30S ribosomal protein S13 OS=Shewanella oneidensis (strain MR-1) OX=211586 GN=rpsM PE=3 SV=1	-2.9174	-4.57251	-1.26229	0.0137317
K4PST1	Pseudouridine synthase OS=Shewanella oneidensis (strain MR-1) OX=211586 GN=rluB PE=3 SV=1	-2.93294	-4.42174	-1.44415	0.0108124
Q8CX35	UDP-N-acetylglucosamine--N-acetylmuramyl-(pentapeptide) pyrophosphoryl-undecaprenol N-acetylglucosamine transferase OS=Shewanella oneidensis (strain MR-1) OX=211586 GN=murG PE=3 SV=1	-2.93703	-4.18688	-1.68719	0.00730936
Q8EEM3	Universal stress protein UspE OS=Shewanella oneidensis (strain MR-1) OX=211586 GN=uspE PE=4 SV=1	-2.9459	-5.14291	-0.748885	0.0372974
P59131	30S ribosomal protein S4 OS=Shewanella oneidensis (strain MR-1) OX=211586 GN=rpsD PE=3 SV=1	-2.95254	-4.22434	-1.68074	0.00764575
Q8EKS3	Bifunctional TolB-family protein/amidohydrolase OS=Shewanella oneidensis (strain MR-1) OX=211586 GN=SO_0017 PE=4 SV=2	-2.9855	-4.40044	-1.57055	0.00914881
Q8EK61	50S ribosomal protein L29 OS=Shewanella oneidensis (strain MR-1) OX=211586 GN=rpmC PE=3 SV=1	-2.99245	-5.01319	-0.971704	0.030438
Q8EGZ6	Putative cytoplasmic protein OS=Shewanella oneidensis (strain MR-1) OX=211586 GN=SO_1441 PE=4 SV=2	-2.99679	-6.22505	0.231479	0.116394
Q8EFW2	Reg family ATPase involved in maintaining contact-dependent viability Uup OS=Shewanella oneidensis (strain MR-1) OX=211586 GN=uup PE=4 SV=1	-3.00169	-5.13816	-0.865224	0.0361805
Q8EFP0	2-oxoglutarate dehydrogenase complex dehydrogenase E1 component SucA OS=Shewanella oneidensis (strain MR-1) OX=211586 GN=sucA PE=4 SV=1	-3.0154	-4.35118	-1.67962	0.00779953
Q8EHW6	Uncharacterized protein OS=Shewanella oneidensis (strain MR-1) OX=211586 GN=SO_1096 PE=4 SV=1	-3.04253	-5.17556	-0.909502	0.0323728
Q8EAJ7	Predicted outer membrane protein OS=Shewanella oneidensis (strain MR-1) OX=211586 GN=SO_3905 PE=4 SV=2	-3.08197	-4.98497	-1.17896	0.0185524
Q8EBD1	Two component signal transduction system controlling curli production response regulator RstA OS=Shewanella oneidensis (strain MR-1) OX=211586 GN=rstA PE=4 SV=1	-3.10313	-4.72045	-1.48582	0.0108124
Q8EEL5	Cbb3-type cytochrome c oxidase subunit I CcoN OS=Shewanella oneidensis (strain MR-1) OX=211586 GN=ccoN PE=3 SV=1	-3.10387	-5.06286	-1.14488	0.0247553
Q8EHD7	30S ribosomal protein S21 OS=Shewanella oneidensis (strain MR-1) OX=211586 GN=rpsU PE=3 SV=1	-3.14139	-4.95659	-1.32619	0.0144543
Q8EAA5	Metal dependent phosphohydrolase with response regulator receiver modulation OS=Shewanella oneidensis (strain MR-1) OX=211586 GN=SO_4003 PE=4 SV=1	-3.14558	-5.06025	-1.23092	0.0173676
Q8EK57	50S ribosomal protein L5 OS=Shewanella oneidensis (strain MR-1) OX=211586 GN=rplE PE=3 SV=1	-3.15826	-4.50405	-1.81248	0.00730936
Q8EC81	3-oxoacyl-(Acyl-carrier-protein) reductase OS=Shewanella oneidensis (strain MR-1) OX=211586 GN=SO_3263 PE=4 SV=2	-3.18139	-5.75746	-0.605313	0.0555679
Q8EGC3	3-hydroxyisobutyryl-CoA hydrolase IvdE OS=Shewanella oneidensis (strain MR-1) OX=211586 GN=ivdE PE=1 SV=1	-3.18371	-5.26735	-1.10007	0.0274143
Q8EHD9	DNA primase OS=Shewanella oneidensis (strain MR-1) OX=211586 GN=dnaG PE=3 SV=1	-3.2096	-5.78567	-0.63352	0.054278
Q8EEG7	Ribonucleoside-diphosphate reductase OS=Shewanella oneidensis (strain MR-1) OX=211586 GN=nrdA PE=3 SV=1	-3.21959	-4.88577	-1.55342	0.0107203
Q8EGH5	30S ribosomal protein S2 OS=Shewanella oneidensis (strain MR-1) OX=211586 GN=rpsB PE=3 SV=1	-3.22991	-4.52569	-1.93414	0.00713064
Q8EGH8	Bifunctional uridylyltransferase/uridylyl-removing enzyme OS=Shewanella oneidensis (strain MR-1) OX=211586 GN=glnD PE=3 SV=1	-3.2389	-5.40972	-1.06808	0.0262751
Q8EK60	30S ribosomal protein S17 OS=Shewanella oneidensis (strain MR-1) OX=211586 GN=rpsQ PE=3 SV=1	-3.24757	-4.65131	-1.84383	0.00764735
Q8CMI1	Uncharacterized protein OS=Shewanella oneidensis (strain MR-1) OX=211586 GN=SO_3043 PE=4 SV=1	-3.25948	-5.97801	-0.540949	0.0569686
Q8EK56	30S ribosomal protein S14 OS=Shewanella oneidensis (strain MR-1) OX=211586 GN=rpsN PE=3 SV=1	-3.25958	-4.58405	-1.93511	0.00721188
Q8EI61	Molybdopterin-binding oxidoreductase OS=Shewanella oneidensis (strain MR-1) OX=211586 GN=SO_0988 PE=3 SV=1	-3.26089	-8.21271	1.69092	0.24989
Q8EJS9	Type I restriction-modification system N6-adenine DNA methyltransferase HsdM OS=Shewanella oneidensis (strain MR-1) OX=211586 GN=hsdM PE=4 SV=2	-3.26264	-6.10674	-0.418531	0.0667447
P59183	30S ribosomal protein S3 OS=Shewanella oneidensis (strain MR-1) OX=211586 GN=rpsC PE=3 SV=1	-3.26292	-4.76975	-1.75609	0.00848262
Q8EI69	Aerobic glycerol-3-phosphate dehydrogenase GlpD OS=Shewanella oneidensis (strain MR-1) OX=211586 GN=glpD PE=4 SV=1	-3.27352	-5.8496	-0.697445	0.0514692
Q8EK66	50S ribosomal protein L23 OS=Shewanella oneidensis (strain MR-1) OX=211586 GN=rplW PE=3 SV=2	-3.27395	-4.84941	-1.69849	0.00932318
Q8CX33	Glutamine--fructose-6-phosphate aminotransferase [isomerizing] OS=Shewanella oneidensis (strain MR-1) OX=211586 GN=glmS PE=3 SV=3	-3.27484	-4.80619	-1.7435	0.00884376
Q8E940	Electron transfer flavoprotein-ubiquinone oxidoreductase EtfQ OS=Shewanella oneidensis (strain MR-1) OX=211586 GN=etfQ PE=4 SV=1	-3.28013	-4.39572	-2.16453	0.00420259
Q8EC78	SAM-dependent methyltransferase in polysaccharide biosynthesis locus OS=Shewanella oneidensis (strain MR-1) OX=211586 GN=SO_3266 PE=4 SV=1	-3.29138	-7.16316	0.580409	0.143937
Q8E9Y1	Nucleoside-specifc outer membrane porin Tsx family OS=Shewanella oneidensis (strain MR-1) OX=211586 GN=SO_4131 PE=4 SV=1	-3.2925	-5.2903	-1.29469	0.0217454
Q8ECB5	Flagellar M-ring protein OS=Shewanella oneidensis (strain MR-1) OX=211586 GN=fliF PE=3 SV=2	-3.30145	-4.73076	-1.87214	0.00764735
Q8EJ49	cAMP-responsive regulator of catabolite repression Crp OS=Shewanella oneidensis (strain MR-1) OX=211586 GN=crp PE=4 SV=1	-3.3059	-4.76987	-1.84193	0.00779953
Q8E874	ABC-type bacteriocin export system multifunctional permease/ATPase/protease component OS=Shewanella oneidensis (strain MR-1) OX=211586 GN=SO_A0049 PE=4 SV=1	-3.31149	-4.63399	-1.98899	0.00724308
Q8E8H9	Outer membrane protein in capsule/EPS biosynthesis locus OS=Shewanella oneidensis (strain MR-1) OX=211586 GN=SO_4685 PE=4 SV=2	-3.32591	-4.88675	-1.76506	0.00892062
Q8ECB0	Flagellar secretion chaperone FliS OS=Shewanella oneidensis (strain MR-1) OX=211586 GN=fliS PE=3 SV=1	-3.33366	-5.30791	-1.35941	0.0204136
Q8ED82	Serine protein kinase PrkA OS=Shewanella oneidensis (strain MR-1) OX=211586 GN=prkA PE=4 SV=1	-3.33683	-5.42596	-1.2477	0.0208589
Q8EHT6	Chaperone protein DnaJ OS=Shewanella oneidensis (strain MR-1) OX=211586 GN=dnaJ PE=3 SV=1	-3.34909	-4.76091	-1.93726	0.00730936
Q8EDL8	Transcriptional regulator LuxR family OS=Shewanella oneidensis (strain MR-1) OX=211586 GN=SO_2725 PE=4 SV=1	-3.35321	-6.39564	-0.310781	0.0739348
Q8EHQ6	Lipoyl synthase OS=Shewanella oneidensis (strain MR-1) OX=211586 GN=lipA PE=3 SV=1	-3.35822	-6.1224	-0.59404	0.0523522
Q8EAH4	30S ribosomal protein S18 OS=Shewanella oneidensis (strain MR-1) OX=211586 GN=rpsR PE=3 SV=1	-3.37674	-4.77725	-1.97623	0.00724308
Q8E9M4	50S ribosomal protein L33 OS=Shewanella oneidensis (strain MR-1) OX=211586 GN=rpmG PE=3 SV=1	-3.38814	-5.44785	-1.32842	0.0218535
Q8EGX7	Serine/threonine protein kinase OS=Shewanella oneidensis (strain MR-1) OX=211586 GN=SO_1461 PE=4 SV=1	-3.42362	-5.54456	-1.30267	0.0212975
Q8EG12	ABC-type peptide uptake system ATPase component 1 SapD OS=Shewanella oneidensis (strain MR-1) OX=211586 GN=sapD PE=3 SV=1	-3.47229	-5.63363	-1.31095	0.0236183
Q8EK72	30S ribosomal protein S7 OS=Shewanella oneidensis (strain MR-1) OX=211586 GN=rpsG PE=3 SV=1	-3.47932	-5.89206	-1.06657	0.0279406
Q8EC86	Flagella assembly protein FlgT OS=Shewanella oneidensis (strain MR-1) OX=211586 GN=flgT PE=4 SV=1	-3.496	-5.09872	-1.89329	0.00845249
Q8E9R9	Regulator of ribonuclease activity A OS=Shewanella oneidensis (strain MR-1) OX=211586 GN=rraA PE=3 SV=1	-3.4994	-5.59602	-1.40277	0.0211543
Q8EEY1	ATP-dependent helicase HrpA OS=Shewanella oneidensis (strain MR-1) OX=211586 GN=hrpA PE=4 SV=1	-3.50473	-5.69064	-1.31881	0.0217454
Q8EHE1	RNA polymerase sigma factor RpoD OS=Shewanella oneidensis (strain MR-1) OX=211586 GN=rpoD PE=3 SV=1	-3.50565	-4.85076	-2.16053	0.00655664
Q8EBZ0	Inner membrane osmoregulator protein YggT OS=Shewanella oneidensis (strain MR-1) OX=211586 GN=yggT PE=4 SV=1	-3.50935	-5.25697	-1.76172	0.0112059
Q8EBS0	Protein RecA OS=Shewanella oneidensis (strain MR-1) OX=211586 GN=recA PE=3 SV=1	-3.51379	-4.99324	-2.03433	0.00730936
Q8EHD1	Murein lipoprotein Lpp OS=Shewanella oneidensis (strain MR-1) OX=211586 GN=lpp PE=4 SV=1	-3.51763	-5.50321	-1.53205	0.0135521
Q8EGP8	Putative lysine decarboxylase with DUF3412 domain OS=Shewanella oneidensis (strain MR-1) OX=211586 GN=SO_1550 PE=4 SV=1	-3.53248	-5.03129	-2.03366	0.00730936
Q8EJZ2	Ornithine decarboxylase SpeF OS=Shewanella oneidensis (strain MR-1) OX=211586 GN=speF PE=4 SV=1	-3.56458	-4.87465	-2.2545	0.00537046
Q8EER6	50S ribosomal protein L20 OS=Shewanella oneidensis (strain MR-1) OX=211586 GN=rplT PE=3 SV=1	-3.57294	-6.32814	-0.817743	0.0420965
Q8E8J7	Probable GTP-binding protein EngB OS=Shewanella oneidensis (strain MR-1) OX=211586 GN=engB PE=3 SV=1	-3.60192	-5.57239	-1.63145	0.0141155
Q8EFZ5	ATP-dependent helicase DinG OS=Shewanella oneidensis (strain MR-1) OX=211586 GN=dinG PE=4 SV=1	-3.61024	-6.24976	-0.970715	0.0373169
Q8EC36	GTPase Der OS=Shewanella oneidensis (strain MR-1) OX=211586 GN=der PE=3 SV=1	-3.64577	-5.11765	-2.17388	0.00713064
Q8E8Z8	Molydopterin cofactor biosynthesis protein OS=Shewanella oneidensis (strain MR-1) OX=211586 GN=SO_4502 PE=4 SV=1	-3.69429	-8.1981	0.809513	0.156102
Q8EK25	Type IV pilus biogenesis protein PilM OS=Shewanella oneidensis (strain MR-1) OX=211586 GN=pilM PE=4 SV=1	-3.70764	-5.94191	-1.47336	0.0212975
Q8EJN7	Dihydrolipoyl dehydrogenase OS=Shewanella oneidensis (strain MR-1) OX=211586 GN=lpdA PE=3 SV=1	-3.7135	-5.75546	-1.67153	0.0126019
Q8EJN9	Pyruvate dehydrogenase E1 component OS=Shewanella oneidensis (strain MR-1) OX=211586 GN=aceE PE=4 SV=1	-3.7313	-5.10638	-2.35621	0.00537046
Q8EAB3	Uncharacterized protein OS=Shewanella oneidensis (strain MR-1) OX=211586 GN=SO_3994 PE=4 SV=2	-3.75381	-7.34395	-0.163668	0.0849332
Q8EAG7	Ribonuclease R OS=Shewanella oneidensis (strain MR-1) OX=211586 GN=rnr PE=3 SV=1	-3.77101	-6.02808	-1.51394	0.0160116
Q8EA75	ATP-dependent RNA helicase DeaD OS=Shewanella oneidensis (strain MR-1) OX=211586 GN=deaD PE=3 SV=1	-3.77951	-5.87332	-1.6857	0.0128659
Q8EGT9	GTPase involved in metallocenter biosynthesis of metalloproteins COG0523 family OS=Shewanella oneidensis (strain MR-1) OX=211586 GN=SO_1502 PE=4 SV=1	-3.85097	-7.40745	-0.29449	0.0782009
Q8E8B1	Chromosome partitioning protein ParA OS=Shewanella oneidensis (strain MR-1) OX=211586 GN=parA PE=4 SV=1	-3.85788	-6.39615	-1.31961	0.0278234
Q8E843	Plasmid partition protein ParB OS=Shewanella oneidensis (strain MR-1) OX=211586 GN=parB PE=4 SV=1	-3.86729	-6.6486	-1.08598	0.035541
Q8EK54	50S ribosomal protein L6 OS=Shewanella oneidensis (strain MR-1) OX=211586 GN=rplF PE=3 SV=1	-3.90673	-5.13185	-2.68161	0.00330344
Q8EG17	Lon protease OS=Shewanella oneidensis (strain MR-1) OX=211586 GN=lon PE=2 SV=1	-3.92489	-5.55976	-2.29002	0.00724308
Q8EF87	Periplasmic [Ni-Fe] hydrogenase large subunit HyaB OS=Shewanella oneidensis (strain MR-1) OX=211586 GN=hyaB PE=3 SV=1	-3.92677	-6.79168	-1.06186	0.0344037
Q8EE09	Long chain fatty acid CoA ligase FadD OS=Shewanella oneidensis (strain MR-1) OX=211586 GN=fadD PE=4 SV=1	-3.9309	-5.52185	-2.33996	0.00713064
Q8EC92	Chemotaxis signal transduction system response regulator CheV OS=Shewanella oneidensis (strain MR-1) OX=211586 GN=cheV PE=4 SV=1	-3.93267	-6.78858	-1.07676	0.0350932
Q8EHF4	Gamma-glutamyl-putrescine synthase PuuA OS=Shewanella oneidensis (strain MR-1) OX=211586 GN=puuA PE=3 SV=1	-3.96328	-6.34854	-1.57802	0.0212975
Q8EDV9	High frequency lysogenization protein HflD homolog OS=Shewanella oneidensis (strain MR-1) OX=211586 GN=hflD PE=3 SV=1	-3.99958	-6.13273	-1.86643	0.0123607
Q8EH72	30S ribosomal protein S16 OS=Shewanella oneidensis (strain MR-1) OX=211586 GN=rpsP PE=3 SV=1	-4.00914	-5.975	-2.04327	0.0120769
Q8EHN8	Putative ATP-binding protein YbeZ OS=Shewanella oneidensis (strain MR-1) OX=211586 GN=ybeZ PE=4 SV=2	-4.01201	-7.7924	-0.23163	0.082309
Q8EKI7	Selenocysteine-specific translation elongation factor SelB OS=Shewanella oneidensis (strain MR-1) OX=211586 GN=selB PE=4 SV=2	-4.02407	-8.20045	0.152306	0.105739
Q8EAR2	Glutamyl-tRNA reductase OS=Shewanella oneidensis (strain MR-1) OX=211586 GN=hemA PE=3 SV=1	-4.0926	-6.24132	-1.94387	0.0117559
Q8EB83	GTPase Obg OS=Shewanella oneidensis (strain MR-1) OX=211586 GN=obg PE=3 SV=1	-4.09737	-6.20508	-1.98966	0.0105407
Q8EIP2	Protein involved in RimO-mediated beta-methylthiolation of ribosomal protein S12 YcaO OS=Shewanella oneidensis (strain MR-1) OX=211586 GN=ycaO PE=4 SV=2	-4.11597	-7.75401	-0.477928	0.0667447
Q8EEN7	3-methyl-2-oxobutanoate dehydrogenase complex E1 component beta subunit BkdA2 OS=Shewanella oneidensis (strain MR-1) OX=211586 GN=bkdA2 PE=4 SV=1	-4.1208	-6.09374	-2.14785	0.00932318
Q8EH83	Elongation factor 4 OS=Shewanella oneidensis (strain MR-1) OX=211586 GN=lepA PE=3 SV=1	-4.14246	-5.85991	-2.425	0.00724308
Q8E9M3	50S ribosomal protein L28 OS=Shewanella oneidensis (strain MR-1) OX=211586 GN=rpmB PE=3 SV=1	-4.16121	-5.77017	-2.55224	0.00677929
Q8EBV4	Endopeptidase La OS=Shewanella oneidensis (strain MR-1) OX=211586 GN=SO_3391 PE=3 SV=1	-4.19609	-8.04203	-0.350162	0.0763533
Q8EK52	50S ribosomal protein L30 OS=Shewanella oneidensis (strain MR-1) OX=211586 GN=rpmD PE=3 SV=1	-4.19704	-6.22096	-2.17312	0.0115551
Q8EA00	MSHA pilus assembly ATPase MshE OS=Shewanella oneidensis (strain MR-1) OX=211586 GN=mshE PE=4 SV=1	-4.21062	-7.58581	-0.835436	0.0502921
Q8EBN7	REG family ATPase YjjK OS=Shewanella oneidensis (strain MR-1) OX=211586 GN=yjjK PE=4 SV=1	-4.22004	-6.32202	-2.11807	0.0105155
Q8EJN8	Acetyltransferase component of pyruvate dehydrogenase complex OS=Shewanella oneidensis (strain MR-1) OX=211586 GN=aceF PE=3 SV=1	-4.25502	-6.11897	-2.39107	0.00779953
Q8EGW8	SsrA-binding protein OS=Shewanella oneidensis (strain MR-1) OX=211586 GN=smpB PE=3 SV=1	-4.26493	-7.12457	-1.40528	0.0250914
Q8EG18	ATP-dependent Clp protease ATP-binding subunit ClpX OS=Shewanella oneidensis (strain MR-1) OX=211586 GN=clpX PE=3 SV=1	-4.26919	-7.12273	-1.41564	0.0260537
Q8EGG2	Lipid-A-disaccharide synthase OS=Shewanella oneidensis (strain MR-1) OX=211586 GN=lpxB PE=3 SV=1	-4.30141	-5.58382	-3.01899	0.00338207
Q8EAK3	DNA topoisomerase 4 subunit B OS=Shewanella oneidensis (strain MR-1) OX=211586 GN=parE PE=3 SV=1	-4.31768	-8.21766	-0.417707	0.0719032
Q8EKK8	Enolase-phosphatase E1 OS=Shewanella oneidensis (strain MR-1) OX=211586 GN=mtnC PE=3 SV=1	-4.32445	-7.60258	-1.04633	0.0395203
Q8EBT8	Tricorn protease homolog OS=Shewanella oneidensis (strain MR-1) OX=211586 GN=SO_3411 PE=3 SV=1	-4.37501	-5.69956	-3.05045	0.00325559
Q8E9U9	ATP-dependent protease ATPase subunit HslU OS=Shewanella oneidensis (strain MR-1) OX=211586 GN=hslU PE=3 SV=1	-4.398	-5.89827	-2.89772	0.00420259
Q8E8A5	Type II restriction-modification system N4-cytosine or N6-adenine DNA methyltransferase OS=Shewanella oneidensis (strain MR-1) OX=211586 GN=SO_A0004 PE=4 SV=2	-4.41155	-6.90237	-1.92072	0.0135521
Q8EK59	50S ribosomal protein L14 OS=Shewanella oneidensis (strain MR-1) OX=211586 GN=rplN PE=3 SV=1	-4.44182	-6.00228	-2.88137	0.0049283
Q8EBE6	Chaperone protein ClpB OS=Shewanella oneidensis (strain MR-1) OX=211586 GN=clpB PE=3 SV=1	-4.47927	-7.43806	-1.52048	0.0236887
Q8EK65	50S ribosomal protein L2 OS=Shewanella oneidensis (strain MR-1) OX=211586 GN=rplB PE=3 SV=1	-4.51259	-6.50917	-2.51601	0.00779953
Q8EJ68	GTPase HflX OS=Shewanella oneidensis (strain MR-1) OX=211586 GN=hflX PE=3 SV=1	-4.52926	-6.42417	-2.63435	0.00730936
Q8EAK6	Outer membrane porin Omp35 OS=Shewanella oneidensis (strain MR-1) OX=211586 GN=omp35 PE=4 SV=1	-4.54235	-5.81881	-3.26589	0.00248199
Q8CX48	60 kDa chaperonin OS=Shewanella oneidensis (strain MR-1) OX=211586 GN=groL PE=3 SV=1	-4.60369	-7.75261	-1.45477	0.0269485
Q8EHG3	Adenylosuccinate synthetase OS=Shewanella oneidensis (strain MR-1) OX=211586 GN=purA PE=3 SV=1	-4.62236	-8.02622	-1.21851	0.0356726
Q8EET7	Acetolactate synthase OS=Shewanella oneidensis (strain MR-1) OX=211586 GN=ilvI PE=3 SV=1	-4.63688	-8.74295	-0.530813	0.0686252
Q8E9Q8	Delta-aminolevulinic acid dehydratase OS=Shewanella oneidensis (strain MR-1) OX=211586 GN=hemB PE=3 SV=1	-4.77973	-8.13548	-1.42397	0.0309
Q8EJQ5	ATP-dependent RNA helicase RhlB OS=Shewanella oneidensis (strain MR-1) OX=211586 GN=rhlB PE=3 SV=1	-4.80795	-6.61599	-2.99992	0.00592414
Q8EKT2	Chromosomal replication initiator protein DnaA OS=Shewanella oneidensis (strain MR-1) OX=211586 GN=dnaA PE=3 SV=1	-4.8824	-7.70555	-2.05925	0.0144543
Q8EEN8	3-methyl-2-oxobutanoate dehydrogenase complex E1 component alpha subunit BkdA1 OS=Shewanella oneidensis (strain MR-1) OX=211586 GN=bkdA1 PE=4 SV=1	-4.90274	-6.68282	-3.12266	0.00537046
Q8EIJ9	Acetyl-CoA carboxylase multifunctional enzyme AccADCB OS=Shewanella oneidensis (strain MR-1) OX=211586 GN=accADCB PE=4 SV=1	-4.91422	-6.09233	-3.73611	0.00121977
Q8EHU6	Cytoplasmic leucyl metal-dependent aminopeptidase OS=Shewanella oneidensis (strain MR-1) OX=211586 GN=SO_1117 PE=4 SV=1	-4.94572	-6.65573	-3.23571	0.00537046
Q8EIG7	Poly(A) polymerase I OS=Shewanella oneidensis (strain MR-1) OX=211586 GN=pcnB PE=3 SV=2	-4.98565	-7.09346	-2.87783	0.00730936
Q8EHR8	Ribosomal RNA large subunit methyltransferase I OS=Shewanella oneidensis (strain MR-1) OX=211586 GN=rlmI PE=3 SV=1	-5.00796	-7.0684	-2.94752	0.00724308
P59375	30S ribosomal protein S11 OS=Shewanella oneidensis (strain MR-1) OX=211586 GN=rpsK PE=3 SV=1	-5.04279	-6.47273	-3.61285	0.00248199
P59166	30S ribosomal protein S12 OS=Shewanella oneidensis (strain MR-1) OX=211586 GN=rpsL PE=3 SV=1	-5.13531	-7.70337	-2.56725	0.0100136
Q8EAK5	DNA topoisomerase 4 subunit A OS=Shewanella oneidensis (strain MR-1) OX=211586 GN=parC PE=3 SV=1	-5.30658	-9.21776	-1.39539	0.0383035
K4PU01	Smf-dependent flagellar motor protein MotY OS=Shewanella oneidensis (strain MR-1) OX=211586 GN=motY PE=3 SV=1	-5.30839	-7.18367	-3.4331	0.0049283
Q8E8A6	Type II restriction-modication system restriction endonuclease OS=Shewanella oneidensis (strain MR-1) OX=211586 GN=SO_A0003 PE=4 SV=1	-5.37212	-8.76341	-1.98083	0.0212975
Q8E9Q0	Cell division protein FtsA OS=Shewanella oneidensis (strain MR-1) OX=211586 GN=ftsA PE=3 SV=1	-5.39242	-7.17549	-3.60935	0.00388953
Q8EEG3	NADP-dependent 24-dienoyl-CoA reductase FadH OS=Shewanella oneidensis (strain MR-1) OX=211586 GN=fadH PE=4 SV=1	-5.41553	-8.8386	-1.99246	0.0228456
Q8EE13	Site-determining protein OS=Shewanella oneidensis (strain MR-1) OX=211586 GN=minD PE=3 SV=1	-5.53903	-7.18225	-3.8958	0.0029913
Q8EDW5	ATP-dependent Clp protease ATPase and specificity subunit ClpA OS=Shewanella oneidensis (strain MR-1) OX=211586 GN=clpA PE=3 SV=1	-5.54856	-8.81964	-2.27748	0.0162913
Q8EBC1;Q8CMJ3;Q8CME4;Q8EES6;Q8E823	ISSod4 transposase TnpA_ISSod4 OS=Shewanella oneidensis (strain MR-1) OX=211586 GN=tnpA PE=4 SV=1;ISSod4 transposase TnpA_ISSod4 OS=Shewanella oneidensis (strain MR-1) OX=211586 GN=tnpA_ISSod4 PE=4 SV=1;ISSod4 transposase TnpA_ISSod4 OS=Shewanella oneidens	-5.59683	-7.22567	-3.96799	0.00330344
Q8EGD5	Sigma54-dependent transcriptional activator of amino acid degradation TyrR OS=Shewanella oneidensis (strain MR-1) OX=211586 GN=tyrR PE=4 SV=1	-5.71076	-10.7564	-0.665122	0.0684384
Q8EGR4	tRNA sulfurtransferase OS=Shewanella oneidensis (strain MR-1) OX=211586 GN=thiI PE=3 SV=1	-5.74335	-8.40029	-3.08641	0.00848262
Q8EIV0	Uncharacterized protein OS=Shewanella oneidensis (strain MR-1) OX=211586 GN=SO_0730 PE=4 SV=1	-5.98781	-9.98199	-1.99363	0.0259453
Q8ECJ4	Periplasmic amidohydrolase family protein OS=Shewanella oneidensis (strain MR-1) OX=211586 GN=SO_3148 PE=4 SV=2	-6.05543	-7.48606	-4.6248	0.00121977
Q8EH62	Probable cytosol aminopeptidase 2 OS=Shewanella oneidensis (strain MR-1) OX=211586 GN=pepA2 PE=3 SV=1	-6.16724	-8.62662	-3.70785	0.00713064
Q8ECG9	NAD-dependent epimerase/dehydratase family protein OS=Shewanella oneidensis (strain MR-1) OX=211586 GN=SO_3173 PE=4 SV=1	-6.44596	-8.04095	-4.85096	0.00132888
Q8EI96	ATP-dependent RNA helicase SrmB OS=Shewanella oneidensis (strain MR-1) OX=211586 GN=srmB PE=3 SV=1	-6.54426	-9.17106	-3.91747	0.00713064
Q8EBP3	6,7-dimethyl-8-ribityllumazine synthase OS=Shewanella oneidensis (strain MR-1) OX=211586 GN=ribH PE=3 SV=1	-6.56873	-7.98678	-5.15068	0.000828112
Q8EEN6	Dihydrolipoamide acetyltransferase component of pyruvate dehydrogenase complex OS=Shewanella oneidensis (strain MR-1) OX=211586 GN=bkdB PE=3 SV=1	-6.65303	-9.37137	-3.93469	0.00724308
Q8EJ92	Predicted ATPase PhoH family OS=Shewanella oneidensis (strain MR-1) OX=211586 GN=SO_0576 PE=4 SV=1	-6.94217	-11.4195	-2.46486	0.0229026
Q8EKF4	Ferritin OS=Shewanella oneidensis (strain MR-1) OX=211586 GN=ftn PE=3 SV=1	-7.74607	-10.7961	-4.69606	0.00693593
Q8EJA4	Zinc-regulated TonB-dependent zinc receptor OS=Shewanella oneidensis (strain MR-1) OX=211586 GN=SO_0564 PE=4 SV=2	-7.80756	-9.81022	-5.8049	0.00367061
Q8EGP7	Diguanylate cyclase OS=Shewanella oneidensis (strain MR-1) OX=211586 GN=SO_1551 PE=4 SV=1	-7.95215	-10.4674	-5.4369	0.00391269
Q8E976	Glutamine synthetase OS=Shewanella oneidensis (strain MR-1) OX=211586 GN=glnA PE=3 SV=1	-8.10428	-10.1864	-6.02218	0.00156267
Q8EBQ4	GTP pyrophosphokinase RelA OS=Shewanella oneidensis (strain MR-1) OX=211586 GN=relA PE=3 SV=1	-8.30098	-11.0059	-5.59611	0.00367061
Q8EAA0	Putative recombination regulator protein DUF3584 family OS=Shewanella oneidensis (strain MR-1) OX=211586 GN=SO_4008 PE=4 SV=2	-8.64683	-9.82984	-7.46382	4.37489e-05
Q8EJU8	Bifunctional ppGpp phosphohydrolase/GTP diphosphokinase SpoT OS=Shewanella oneidensis (strain MR-1) OX=211586 GN=spoT PE=3 SV=1	-9.52457	-11.2354	-7.81373	0.000615218
Q8EHV0	Ferroxidase OS=Shewanella oneidensis (strain MR-1) OX=211586 GN=brf1 PE=3 SV=1
Q8EHV1	Ferroxidase OS=Shewanella oneidensis (strain MR-1) OX=211586 GN=brf2 PE=3 SV=1
Q8EGL7	Succinylglutamate desuccinylase/aspartoacylase family protein OS=Shewanella oneidensis (strain MR-1) OX=211586 GN=SO_1583 PE=4 SV=1
Q8EBY4	Uncharacterized protein OS=Shewanella oneidensis (strain MR-1) OX=211586 GN=SO_3361 PE=4 SV=1
Q8ECS3	Sigma54 specific transcriptional regulator Fis family OS=Shewanella oneidensis (strain MR-1) OX=211586 GN=SO_3059 PE=4 SV=1
Q8EAN9	Diguanylate cyclase OS=Shewanella oneidensis (strain MR-1) OX=211586 GN=SO_3859 PE=4 SV=1
Q8EF94	Hydrogenase maturation factor OS=Shewanella oneidensis (strain MR-1) OX=211586 GN=hypD PE=3 SV=1
Q8EKR0	Ribosomal RNA small subunit methyltransferase B OS=Shewanella oneidensis (strain MR-1) OX=211586 GN=rsmB PE=3 SV=1
Q8EBY5;Q8EAM2;Q8E9J3;Q8E901;Q8EEG4	ISSod5 transposase TnpA_ISSod5 OS=Shewanella oneidensis (strain MR-1) OX=211586 GN=tnpA PE=4 SV=1;ISSod5 transposase TnpA_ISSod5 OS=Shewanella oneidensis (strain MR-1) OX=211586 GN=tnpA PE=4 SV=1;ISSod5 transposase TnpA_ISSod5 OS=Shewanella oneidensis (str
Q8CMD3	ISSod11 transposase TnpA_ISSod11 OS=Shewanella oneidensis (strain MR-1) OX=211586 GN=tnpA PE=4 SV=1
Q8EF17	Exopolyphosphatase Ppx OS=Shewanella oneidensis (strain MR-1) OX=211586 GN=ppx PE=3 SV=1
Q8E8C8	Putative cytoplasmic protein OS=Shewanella oneidensis (strain MR-1) OX=211586 GN=SO_4738 PE=4 SV=1
Q8EK22	PilQ chaperone PilP OS=Shewanella oneidensis (strain MR-1) OX=211586 GN=pilP PE=4 SV=1
Q8E8E7	Tungstate-responsive two component Sigma54-dependent signal transduction system response regulator Fis family OS=Shewanella oneidensis (strain MR-1) OX=211586 GN=SO_4718 PE=4 SV=1
Q8CM48	ISSod9 transposase TnpA_ISSod9 OS=Shewanella oneidensis (strain MR-1) OX=211586 GN=tnpA_ISSod9 PE=4 SV=1
Q8E864	Plasmid stability/partitioning determinant RepA OS=Shewanella oneidensis (strain MR-1) OX=211586 GN=repA PE=4 SV=1
Q8ECD2	Site-determining protein OS=Shewanella oneidensis (strain MR-1) OX=211586 GN=flhG PE=3 SV=2
Q8E966	Subfamily M23B unassigned peptidase OS=Shewanella oneidensis (strain MR-1) OX=211586 GN=SO_4420 PE=4 SV=1
Q8E8Y9	Formate dehydrogenase cytochrome b subunit FdhC OS=Shewanella oneidensis (strain MR-1) OX=211586 GN=fdhC PE=4 SV=1
Q8EHN2	Uncharacterized protein OS=Shewanella oneidensis (strain MR-1) OX=211586 GN=SO_1187 PE=4 SV=2
Q8EA39	Periplasmic protein associated with oxidative stress YggE OS=Shewanella oneidensis (strain MR-1) OX=211586 GN=yggE PE=4 SV=1
Q8EFR8	Transcriptional repressor of branched chain amino acid degradation LiuR OS=Shewanella oneidensis (strain MR-1) OX=211586 GN=liuR PE=4 SV=1
Q8E8P5	Carbohydrate esterase family 4 OS=Shewanella oneidensis (strain MR-1) OX=211586 GN=SO_4616 PE=4 SV=1
Q8EF70	Acetyl-CoA synthetase acetylase YfiQ OS=Shewanella oneidensis (strain MR-1) OX=211586 GN=yfiQ PE=4 SV=1
Q8ECJ3	Periplasmic amidohydrolase family protein OS=Shewanella oneidensis (strain MR-1) OX=211586 GN=SO_3149 PE=4 SV=1
Q8ECV9	Lambda phage integrase Int OS=Shewanella oneidensis (strain MR-1) OX=211586 GN=int PE=3 SV=1
Q8ECD9	ParA family protein OS=Shewanella oneidensis (strain MR-1) OX=211586 GN=SO_3204 PE=4 SV=1
Q8EEM7	Putative gluconeogenesis factor OS=Shewanella oneidensis (strain MR-1) OX=211586 GN=SO_2351 PE=3 SV=1
Q8E9H3	Putative lipoprotein OS=Shewanella oneidensis (strain MR-1) OX=211586 GN=SO_4310 PE=4 SV=1
Q8EKC3	T2aSS secretion system protein GspJ OS=Shewanella oneidensis (strain MR-1) OX=211586 GN=gspJ PE=4 SV=1
Q8EGM5	tRNA/rRNA cytosine-C5-methylase RsmB OS=Shewanella oneidensis (strain MR-1) OX=211586 GN=rsmB PE=3 SV=2
Q8EBP1	Riboflavin synthase alpha subunit RibC-like protein OS=Shewanella oneidensis (strain MR-1) OX=211586 GN=SO_3468 PE=4 SV=1
Q8EDR8	Uncharacterized protein OS=Shewanella oneidensis (strain MR-1) OX=211586 GN=SO_2675 PE=4 SV=1
Q8ECP1	TPR domain protein in aerotolerance operon BatB OS=Shewanella oneidensis (strain MR-1) OX=211586 GN=batB PE=4 SV=1
Q8EHR1	TonB-dependent siderophore receptor OS=Shewanella oneidensis (strain MR-1) OX=211586 GN=SO_1156 PE=3 SV=1
Q8EIT1	ABC-type Ni2+/Co2+ export system bifunctional ATPase and permease components AtmA OS=Shewanella oneidensis (strain MR-1) OX=211586 GN=atmA PE=4 SV=1
Q8EGM9	Bifunctional DNA-binding protein / oxidoreductase OS=Shewanella oneidensis (strain MR-1) OX=211586 GN=SO_1571 PE=4 SV=1
Q8EBQ6	WGR domain protein OS=Shewanella oneidensis (strain MR-1) OX=211586 GN=SO_3449 PE=4 SV=1
Q8EB39	Predicted periplasmic protein OS=Shewanella oneidensis (strain MR-1) OX=211586 GN=SO_3696 PE=4 SV=1
Q8E939	Energy taxis-modulating methyl-accepting chemotaxis protein with Cache_1 sensory domain OS=Shewanella oneidensis (strain MR-1) OX=211586 GN=SO_4454 PE=4 SV=2
Q8EJZ5	UPF0313 protein SO_0311 OS=Shewanella oneidensis (strain MR-1) OX=211586 GN=SO_0311 PE=3 SV=1
Q8E801	S-formylglutathione hydrolase OS=Shewanella oneidensis (strain MR-1) OX=211586 GN=frmB PE=3 SV=1
Q8ECK4	TRAP-type C4-dicarboxylate:H+ symport system substrate-binding component DctP OS=Shewanella oneidensis (strain MR-1) OX=211586 GN=dctP PE=1 SV=1
Q8EEV6	ABC-type lipoprotein release system permease component LolE OS=Shewanella oneidensis (strain MR-1) OX=211586 GN=lolE PE=4 SV=1
Q8EFK8	Homogentisate 1,2-dioxygenase HmgA OS=Shewanella oneidensis (strain MR-1) OX=211586 GN=hmgA PE=3 SV=1
Q7CCS5	ISSod1 transposase TnpA_ISSod1 OS=Shewanella oneidensis (strain MR-1) OX=211586 GN=tnpA PE=4 SV=2
Q8EBZ5	Pilus retraction ATPase PilU OS=Shewanella oneidensis (strain MR-1) OX=211586 GN=pilU PE=4 SV=1
Q8EGQ0	Uncharacterized protein OS=Shewanella oneidensis (strain MR-1) OX=211586 GN=SO_1548 PE=4 SV=1
Q8EHJ9	SMP-2 superfamily membrane protein OS=Shewanella oneidensis (strain MR-1) OX=211586 GN=SO_1222 PE=4 SV=1
Q8EBA1	NADH-dependent hydroxypyruvate reductase HprA OS=Shewanella oneidensis (strain MR-1) OX=211586 GN=hprA PE=3 SV=1
Q8ECD7	Chemotaxis response regulator protein-glutamate methylesterase of group 1 operon OS=Shewanella oneidensis (strain MR-1) OX=211586 GN=cheB1 PE=3 SV=1
Q8EBZ4	Pilus retraction protein PilT OS=Shewanella oneidensis (strain MR-1) OX=211586 GN=pilT PE=4 SV=1
Q8E810	Uncharacterized protein OS=Shewanella oneidensis (strain MR-1) OX=211586 GN=SO_A0150 PE=4 SV=2
Q8EI44	Dienelactone hydrolase family protein YghX OS=Shewanella oneidensis (strain MR-1) OX=211586 GN=yghX PE=4 SV=1
Q8EJL4	Iron-regulated inner membrane protein OS=Shewanella oneidensis (strain MR-1) OX=211586 GN=SO_0449 PE=4 SV=1
Q8EGB8	Serine peptidase S9 family OS=Shewanella oneidensis (strain MR-1) OX=211586 GN=SO_1686 PE=4 SV=1
Q8EG04	Uncharacterized protein OS=Shewanella oneidensis (strain MR-1) OX=211586 GN=ycjX PE=4 SV=1
Q8EK17	Site-specific DNA-methyltransferase (adenine-specific) OS=Shewanella oneidensis (strain MR-1) OX=211586 GN=dam PE=3 SV=1
Q8EI16	Bifunctional adenosylcobalamin biosynthesis protein OS=Shewanella oneidensis (strain MR-1) OX=211586 GN=cobU PE=3 SV=1
Q8EII2	ABC-type export system ATPase component AttE OS=Shewanella oneidensis (strain MR-1) OX=211586 GN=attE PE=4 SV=1
Q8EAZ2	Bifunctional protein HldE OS=Shewanella oneidensis (strain MR-1) OX=211586 GN=hldE PE=3 SV=1
Q8EKC5	T2aSS secretion system pseudopilus protein GspH OS=Shewanella oneidensis (strain MR-1) OX=211586 GN=gspH PE=4 SV=1
Q8E7Z7	Uncharacterized protein OS=Shewanella oneidensis (strain MR-1) OX=211586 GN=SO_A0171 PE=4 SV=1
Q8EA72	Predicted lipoprotein OS=Shewanella oneidensis (strain MR-1) OX=211586 GN=SO_4037 PE=4 SV=2
Q8E9A8	Uncharacterized protein OS=Shewanella oneidensis (strain MR-1) OX=211586 GN=SO_4376 PE=4 SV=1
Q8E8E0	Membrane anchored protein associated with MutM OS=Shewanella oneidensis (strain MR-1) OX=211586 GN=mutM PE=4 SV=1
Q8EBA8	Periplasmic RmlC-type Cupin domain family protein OS=Shewanella oneidensis (strain MR-1) OX=211586 GN=SO_3622 PE=4 SV=1
Q8EHS3	Chemotaxis signal transduction system methyl accepting sensory transducer OS=Shewanella oneidensis (strain MR-1) OX=211586 GN=SO_1144 PE=4 SV=1
Q8ECD8	Putative membrane anchored protein in chemotaxis locus OS=Shewanella oneidensis (strain MR-1) OX=211586 GN=SO_3205 PE=4 SV=2
Q8ECD1	Flagellar polar localization control system flagellar assembly determinant GTPase FlhF OS=Shewanella oneidensis (strain MR-1) OX=211586 GN=flhF PE=4 SV=1
Q8EAV4	Uncharacterized protein OS=Shewanella oneidensis (strain MR-1) OX=211586 GN=SO_3787 PE=4 SV=1
Q8E865	Toxin-antitoxin system toxin GNAT family OS=Shewanella oneidensis (strain MR-1) OX=211586 GN=SO_A0060 PE=4 SV=1
Q8EGG9	1-deoxy-D-xylulose 5-phosphate reductoisomerase OS=Shewanella oneidensis (strain MR-1) OX=211586 GN=dxr PE=3 SV=1
Q8EDI6	Haloacid dehalogenase subfamily IIA associated with N-acetylglucosamine degradation NagD OS=Shewanella oneidensis (strain MR-1) OX=211586 GN=nagD PE=4 SV=1
Q8EHJ5	DNA repair protein RadA OS=Shewanella oneidensis (strain MR-1) OX=211586 GN=radA PE=3 SV=1
Q8EJK4	Putative ATPase DUF853 family OS=Shewanella oneidensis (strain MR-1) OX=211586 GN=SO_0459 PE=4 SV=1
Q8EC85	Motility accessory factor Maf OS=Shewanella oneidensis (strain MR-1) OX=211586 GN=maf PE=4 SV=1
Q8E8L7	Propeptide PepSY amd peptidase M4 domain protein OS=Shewanella oneidensis (strain MR-1) OX=211586 GN=SO_4646 PE=4 SV=1
Q8EFA4	ATP-dependent helicase DinG family OS=Shewanella oneidensis (strain MR-1) OX=211586 GN=SO_2081 PE=4 SV=1
Q8EER1	AAA ATPase family protein OS=Shewanella oneidensis (strain MR-1) OX=211586 GN=SO_2308 PE=4 SV=2
Q8ECB3	Two component signal transduction system controlling flagella biosynthesis Sigma54-dependent response regulator FlrC OS=Shewanella oneidensis (strain MR-1) OX=211586 GN=flrC PE=4 SV=1
Q8EI01	Phosphate transporter OS=Shewanella oneidensis (strain MR-1) OX=211586 GN=pitB PE=3 SV=1
Q8E861	Uncharacterized protein OS=Shewanella oneidensis (strain MR-1) OX=211586 GN=SO_A0067 PE=4 SV=1
Q8E941	GTP 3,8-cyclase OS=Shewanella oneidensis (strain MR-1) OX=211586 GN=moaA PE=3 SV=2
Q8EGG0	DNA-directed DNA polymerase OS=Shewanella oneidensis (strain MR-1) OX=211586 GN=dnaE PE=4 SV=1
Q8EBR1	Cell division protein FtsB OS=Shewanella oneidensis (strain MR-1) OX=211586 GN=ftsB PE=3 SV=1
Q8EHE9	Gamma-glutamylputrescine oxidoreductase PuuB OS=Shewanella oneidensis (strain MR-1) OX=211586 GN=puuB PE=4 SV=1
Q8EJ70	DNA mismatch repair protein MutL OS=Shewanella oneidensis (strain MR-1) OX=211586 GN=mutL PE=3 SV=1
Q8ED27	Lambda phage structural protein OS=Shewanella oneidensis (strain MR-1) OX=211586 GN=SO_2944 PE=4 SV=1
Q8EFU3	Surface lipoprotein with VCBS repeats OS=Shewanella oneidensis (strain MR-1) OX=211586 GN=SO_1872 PE=4 SV=1
Q8EJU3	Phosphotransferase enzyme family protein OS=Shewanella oneidensis (strain MR-1) OX=211586 GN=SO_0364 PE=4 SV=1
Q8CME3	ISSod9 resolvase TnpR_ISSod9 OS=Shewanella oneidensis (strain MR-1) OX=211586 GN=tnpR_ISSod9 PE=4 SV=1
K4PU11	23S rRNA pseudouridine synthase RluA family OS=Shewanella oneidensis (strain MR-1) OX=211586 GN=SO_3118 PE=4 SV=1
Q8EEQ4	Chemotaxis signal transduction system methyl accepting sensory transducer OS=Shewanella oneidensis (strain MR-1) OX=211586 GN=SO_2323 PE=4 SV=1
Q8EKC4	T2aSS secretion system pseudopilus protein GspI OS=Shewanella oneidensis (strain MR-1) OX=211586 GN=gspI PE=4 SV=1
Q8EED1	SAM-dependent methyltransferase OS=Shewanella oneidensis (strain MR-1) OX=211586 GN=SO_2451 PE=3 SV=2
Q8EH86	Anti-sigma-E factor RseA OS=Shewanella oneidensis (strain MR-1) OX=211586 GN=rseA PE=3 SV=1
Q8EK97	Transcriptional repressor of fatty acid biosynthesis FabR OS=Shewanella oneidensis (strain MR-1) OX=211586 GN=fabR PE=4 SV=1
Q8E9M1	Coenzyme A biosynthesis bifunctional protein CoaBC OS=Shewanella oneidensis (strain MR-1) OX=211586 GN=dfp PE=3 SV=2
Q8EIN2	CBS domain containing protein OS=Shewanella oneidensis (strain MR-1) OX=211586 GN=SO_0805 PE=4 SV=2
Q8ECZ4	Lambda phage uncharacterized protein OS=Shewanella oneidensis (strain MR-1) OX=211586 GN=SO_2977 PE=4 SV=2
Q8EIK6	Endonuclease I EndA OS=Shewanella oneidensis (strain MR-1) OX=211586 GN=endA PE=4 SV=1
Q8EJQ0	Cell division protein ZapD OS=Shewanella oneidensis (strain MR-1) OX=211586 GN=zapD PE=3 SV=1
Q8EBZ6	Glutathione peroxidase OS=Shewanella oneidensis (strain MR-1) OX=211586 GN=SO_3349 PE=3 SV=1
Q8EJP8	Type 4 prepilin-like proteins leader peptide-processing enzyme OS=Shewanella oneidensis (strain MR-1) OX=211586 GN=pilD PE=3 SV=1
Q8EAV5	Uncharacterized protein OS=Shewanella oneidensis (strain MR-1) OX=211586 GN=SO_3786 PE=4 SV=2
Q8E9P1	Cell division protein FtsL OS=Shewanella oneidensis (strain MR-1) OX=211586 GN=ftsL PE=3 SV=1
Q8EFV1	Uncharacterized protein OS=Shewanella oneidensis (strain MR-1) OX=211586 GN=SO_1864 PE=4 SV=2
Q8E8T4	2-succinyl-5-enolpyruvyl-6-hydroxy-3-cyclohexene-1-carboxylate synthase OS=Shewanella oneidensis (strain MR-1) OX=211586 GN=menD PE=3 SV=1
Q8EJ99	Diguanylate cyclase with PAS sensory domain OS=Shewanella oneidensis (strain MR-1) OX=211586 GN=SO_0569 PE=4 SV=1
Q8EAN2	Site-specific recombinase phage integrase family OS=Shewanella oneidensis (strain MR-1) OX=211586 GN=SO_3866 PE=3 SV=2
Q8E9Y8	Primosomal protein N OS=Shewanella oneidensis (strain MR-1) OX=211586 GN=priA PE=3 SV=1
Q8EKH3	Outer membrane porin OS=Shewanella oneidensis (strain MR-1) OX=211586 GN=SO_0120 PE=4 SV=1
Q8E8Z6	Uncharacterized protein OS=Shewanella oneidensis (strain MR-1) OX=211586 GN=SO_4504 PE=4 SV=1
Q8EDR1	Mu phage uncharacterized protein OS=Shewanella oneidensis (strain MR-1) OX=211586 GN=SO_2682 PE=4 SV=1
Q8EGA5	Putative lipoprotein OS=Shewanella oneidensis (strain MR-1) OX=211586 GN=SO_1700 PE=4 SV=1
Q8EJT3	Uncharacterized protein OS=Shewanella oneidensis (strain MR-1) OX=211586 GN=SO_0379 PE=4 SV=1
Q8EIC1	Dicarboxylate:amino acid:cation symporter DAACS family OS=Shewanella oneidensis (strain MR-1) OX=211586 GN=SO_0922 PE=3 SV=2
Q8EA15	Ribonuclease G Rng OS=Shewanella oneidensis (strain MR-1) OX=211586 GN=rng PE=4 SV=2
Q8EFK5	Uncharacterized protein OS=Shewanella oneidensis (strain MR-1) OX=211586 GN=SO_1966 PE=4 SV=1
Q8EJY0	Uncharacterized protein OS=Shewanella oneidensis (strain MR-1) OX=211586 GN=SO_0326 PE=4 SV=1
Q8EAB4	Uncharacterized protein OS=Shewanella oneidensis (strain MR-1) OX=211586 GN=SO_3993 PE=4 SV=2
Q8EFG0	DNA polymerase III gamma and tau subunits DnaX OS=Shewanella oneidensis (strain MR-1) OX=211586 GN=dnaX PE=4 SV=1
Q8ED50	Autoinducer-2 transport protein TqsA OS=Shewanella oneidensis (strain MR-1) OX=211586 GN=tqsA PE=4 SV=1
Q8E9H7	HAD-superfamily hydrolase subfamily IA variant 1 family protein OS=Shewanella oneidensis (strain MR-1) OX=211586 GN=SO_4305 PE=4 SV=1
Q8EAU7	Morn variant repeat protein OS=Shewanella oneidensis (strain MR-1) OX=211586 GN=SO_3794 PE=4 SV=1
Q8EG05	Phage shock protein C PspC OS=Shewanella oneidensis (strain MR-1) OX=211586 GN=pspC PE=4 SV=1
Q8EIK2	Beta-lactamase OS=Shewanella oneidensis (strain MR-1) OX=211586 GN=blaA PE=3 SV=1
Q8EEH5	Glycine radical enzyme YjjI family OS=Shewanella oneidensis (strain MR-1) OX=211586 GN=SO_2407 PE=4 SV=1
Q8ECB1	Sigma54-dependent transcriptional regulator for flagellar biosynthesis FlrA OS=Shewanella oneidensis (strain MR-1) OX=211586 GN=flrA PE=4 SV=1
Q8EJK8	Alpha-ketoglutarate uptake system bifunctional large and small subunit permease component OS=Shewanella oneidensis (strain MR-1) OX=211586 GN=SO_0455 PE=4 SV=1
Q8EAK7	HesA/MoeB/ThiF family protein OS=Shewanella oneidensis (strain MR-1) OX=211586 GN=SO_3895 PE=4 SV=1
Q8EDU8	Putative phosphoenolpyruvate synthase regulatory protein OS=Shewanella oneidensis (strain MR-1) OX=211586 GN=SO_2645 PE=3 SV=1
Q8EK49	50S ribosomal protein L36 OS=Shewanella oneidensis (strain MR-1) OX=211586 GN=rpmJ PE=3 SV=1
Q8EEY9	Nucleoside diphosphate hydrolase YeaB OS=Shewanella oneidensis (strain MR-1) OX=211586 GN=yeaB PE=4 SV=1
Q8EJH1	Glutathione synthetase ATP-binding domain-like superfamily protein OS=Shewanella oneidensis (strain MR-1) OX=211586 GN=SO_0496 PE=4 SV=1
Q8EGM1	Uncharacterized protein OS=Shewanella oneidensis (strain MR-1) OX=211586 GN=SO_1579 PE=4 SV=1
Q8ED87	DnaA regulatory inactivator Hda OS=Shewanella oneidensis (strain MR-1) OX=211586 GN=hda PE=3 SV=1
P46148	Electron transport regulator A OS=Shewanella oneidensis (strain MR-1) OX=211586 GN=etrA PE=3 SV=2
Q8E9X7;Q8CM19	ISSod7 transposase TnpA_ISSod7 OS=Shewanella oneidensis (strain MR-1) OX=211586 GN=tnpA PE=4 SV=1;ISSod7 transposase TnpA_ISSod7 OS=Shewanella oneidensis (strain MR-1) OX=211586 GN=tnpA PE=4 SV=1
Q8E8L1	ABC-type sulfate/thiosulfate uptakesystem substrate-binding subunit Sbp OS=Shewanella oneidensis (strain MR-1) OX=211586 GN=sbp PE=4 SV=1
Q8EHF7	Putrescine degradation gene regulator PuuR OS=Shewanella oneidensis (strain MR-1) OX=211586 GN=puuR PE=4 SV=1
Q8EKL4	Predicted lipoprotein OS=Shewanella oneidensis (strain MR-1) OX=211586 GN=SO_0078 PE=4 SV=1
Q8E8D1	Bifunctional diguanylate cyclase/phosphodiesterase with PAS sensory domain OS=Shewanella oneidensis (strain MR-1) OX=211586 GN=SO_4734 PE=4 SV=2
Q8EAE2	Nucleotide-binding protein SO_3964 OS=Shewanella oneidensis (strain MR-1) OX=211586 GN=SO_3964 PE=3 SV=1
Q8EFQ8	Oxidoreductase short chain dehydrogenase/reductase family OS=Shewanella oneidensis (strain MR-1) OX=211586 GN=SO_1911 PE=3 SV=2
Q8ECP5	MoxR-like ATPase in aerotolerance operon OS=Shewanella oneidensis (strain MR-1) OX=211586 GN=SO_3090 PE=4 SV=2
Q8E8E1	GTP 3,8-cyclase OS=Shewanella oneidensis (strain MR-1) OX=211586 GN=moaA PE=3 SV=1
Q8EF05	Ribosomal protein S6 glutaminyl transferase RimK OS=Shewanella oneidensis (strain MR-1) OX=211586 GN=rimK PE=3 SV=1
Q8EC46	Outer membrane beta barrel protein OS=Shewanella oneidensis (strain MR-1) OX=211586 GN=SO_3298 PE=4 SV=1
Q8ED48	Predicted nucleoside-diphosphate sugar epimerase YfcH OS=Shewanella oneidensis (strain MR-1) OX=211586 GN=yfcH PE=4 SV=1
Q8EFJ5	Uncharacterized protein OS=Shewanella oneidensis (strain MR-1) OX=211586 GN=SO_1977 PE=4 SV=1
Q8CX38	ABC-type phospholipid uptake (Salvage) system anti-anti-sigma factor MlaB OS=Shewanella oneidensis (strain MR-1) OX=211586 GN=mlaB PE=4 SV=1
Q8E9K3	Uncharacterized protein OS=Shewanella oneidensis (strain MR-1) OX=211586 GN=SO_4270 PE=4 SV=1
Q8ED42	Multifunctional thioesterase/protease/lysophospholipase L1 TesA OS=Shewanella oneidensis (strain MR-1) OX=211586 GN=tesA PE=4 SV=2
Q8EKG2	Probable chorismate pyruvate-lyase OS=Shewanella oneidensis (strain MR-1) OX=211586 GN=ubiC PE=3 SV=1
Q8E8G8	3-methyladenine DNA glycosylase OS=Shewanella oneidensis (strain MR-1) OX=211586 GN=SO_4696 PE=4 SV=1
Q8E9P9	Cell division protein FtsQ OS=Shewanella oneidensis (strain MR-1) OX=211586 GN=ftsQ PE=3 SV=1
Q8CX50	tRNA dimethylallyltransferase OS=Shewanella oneidensis (strain MR-1) OX=211586 GN=miaA PE=3 SV=1
Q8EHH3	Peptidase U32 family YhbV OS=Shewanella oneidensis (strain MR-1) OX=211586 GN=SO_1248 PE=4 SV=1
Q8E9F9	Bifunctional diguanylate cyclase/phosphodiesterase with GAF sensory domain OS=Shewanella oneidensis (strain MR-1) OX=211586 GN=SO_4324 PE=4 SV=1
Q8EDZ5	BNR repeat protein OS=Shewanella oneidensis (strain MR-1) OX=211586 GN=SO_2595 PE=4 SV=1
Q8EE51	Two component signal transduction system response regulator with cyclic diguanylate phosphodiesterase activity and PAS sensory domain OS=Shewanella oneidensis (strain MR-1) OX=211586 GN=SO_2539 PE=4 SV=1
Q8EB13	Adenylyl-sulfate kinase OS=Shewanella oneidensis (strain MR-1) OX=211586 GN=cysC PE=3 SV=1
Q8ED09	Lambda phage helical domain protein OS=Shewanella oneidensis (strain MR-1) OX=211586 GN=SO_2962 PE=4 SV=1
Q8EEK7	Transcriptional regulator YdhB OS=Shewanella oneidensis (strain MR-1) OX=211586 GN=ydhB PE=4 SV=1
Q8E834	EAL domain protein OS=Shewanella oneidensis (strain MR-1) OX=211586 GN=SO_A0109 PE=4 SV=1
Q8EIV9	Predicted periplasmic protein OS=Shewanella oneidensis (strain MR-1) OX=211586 GN=SO_0720 PE=4 SV=1
Q8EBV9	Uncharacterized protein OS=Shewanella oneidensis (strain MR-1) OX=211586 GN=SO_3386 PE=4 SV=1
Q8EBW1	Deoxyribodipyrimidine photolyase PhrB OS=Shewanella oneidensis (strain MR-1) OX=211586 GN=phrB PE=3 SV=1
Q8E9T3	Diguanylate cyclase-like protein MxdA OS=Shewanella oneidensis (strain MR-1) OX=211586 GN=mxdA PE=4 SV=1
Q8EKK1	Cyclic nucleotide binding domain protein OS=Shewanella oneidensis (strain MR-1) OX=211586 GN=SO_0091 PE=4 SV=1
Q8EJC1	Probable alpha-L-glutamate ligase 1 OS=Shewanella oneidensis (strain MR-1) OX=211586 GN=rimK1 PE=3 SV=1
Q8EGC2	3-hydroxyisobutyrate dehydrogenase OS=Shewanella oneidensis (strain MR-1) OX=211586 GN=ivdF PE=3 SV=1
Q8EI20	ABC-type cobalamin uptake system ATPase component BtuD OS=Shewanella oneidensis (strain MR-1) OX=211586 GN=btuD PE=4 SV=2
Q8EC71	Motility accessory factor Maf family OS=Shewanella oneidensis (strain MR-1) OX=211586 GN=SO_3273 PE=4 SV=1
Q8EJ20	Mu phage uncharacterized protein OS=Shewanella oneidensis (strain MR-1) OX=211586 GN=SO_0653 PE=4 SV=2
Q8E8L4	Uncharacterized protein OS=Shewanella oneidensis (strain MR-1) OX=211586 GN=SO_4649 PE=4 SV=1
Q8EGX0	CP4-57-like prophage integrase IntA OS=Shewanella oneidensis (strain MR-1) OX=211586 GN=intA PE=3 SV=1
Q8ECW3	Lambda phage uncharacterized protein OS=Shewanella oneidensis (strain MR-1) OX=211586 GN=SO_3009 PE=4 SV=2
Q8ED51	S-adenosylmethionine-dependent methyltransferase OS=Shewanella oneidensis (strain MR-1) OX=211586 GN=SO_2919 PE=3 SV=1
Q8CX52	tRNA modification GTPase MnmE OS=Shewanella oneidensis (strain MR-1) OX=211586 GN=mnmE PE=3 SV=2
Q8EII3	ABC-type export system permease component AttFG OS=Shewanella oneidensis (strain MR-1) OX=211586 GN=attFG PE=4 SV=1
Q8EHD2	Ribosomal RNA large subunit methyltransferase A OS=Shewanella oneidensis (strain MR-1) OX=211586 GN=SO_1294 PE=4 SV=1
Q8EBG7	RNA polymerase sigma-70 factor ECF subfamily OS=Shewanella oneidensis (strain MR-1) OX=211586 GN=SO_3551 PE=3 SV=1
Q8EJP6	Type IV pilus assembly ATPase PilB OS=Shewanella oneidensis (strain MR-1) OX=211586 GN=pilB PE=4 SV=1
Q8EFM8	Cyclic di-GMP hydrolase OS=Shewanella oneidensis (strain MR-1) OX=211586 GN=SO_1942 PE=4 SV=1
Q8EIV4	Photoreactivation-associated protein PhrA OS=Shewanella oneidensis (strain MR-1) OX=211586 GN=phrA PE=4 SV=2
Q8EDQ6	Mu phage uncharacterized protein OS=Shewanella oneidensis (strain MR-1) OX=211586 GN=SO_2687 PE=4 SV=1
Q8EKS2	MOSC domain protein OS=Shewanella oneidensis (strain MR-1) OX=211586 GN=SO_0018 PE=4 SV=1
Q8E9C0	ATP-dependent DNA helicase RecG OS=Shewanella oneidensis (strain MR-1) OX=211586 GN=recG PE=3 SV=2
Q8E9B3	AMP-dependent synthetase and ligase family protein OS=Shewanella oneidensis (strain MR-1) OX=211586 GN=SO_4371 PE=4 SV=1
Q8EFM4	Two component signal transduction system response regulator PhoP OS=Shewanella oneidensis (strain MR-1) OX=211586 GN=phoP PE=4 SV=1
Q8EKT7	Glutathione uptake transporter OS=Shewanella oneidensis (strain MR-1) OX=211586 GN=SO_0002 PE=1 SV=1
Q8E916	Sigma54 dependent transcriptional regulator with GAF sensory domain Fis family OS=Shewanella oneidensis (strain MR-1) OX=211586 GN=SO_4479 PE=4 SV=1
Q8EIG9	3-methyl-2-oxobutanoate hydroxymethyltransferase OS=Shewanella oneidensis (strain MR-1) OX=211586 GN=panB PE=3 SV=1
Q8E7Z8	Transcriptional regulator LysR family OS=Shewanella oneidensis (strain MR-1) OX=211586 GN=SO_A0165 PE=4 SV=1
Q8E9V7	Thiosulfate/tetrathionate-responsive two component signal transduction system histidine kinase TtrS OS=Shewanella oneidensis (strain MR-1) OX=211586 GN=ttrS PE=4 SV=1
Q8EIF5	Uncharacterized protein OS=Shewanella oneidensis (strain MR-1) OX=211586 GN=SO_0884 PE=4 SV=2
Q8EGF3	Helicase/SNF2 family domain protein OS=Shewanella oneidensis (strain MR-1) OX=211586 GN=SO_1651 PE=4 SV=2
Q8EBW9	Predicted lipoprotein OS=Shewanella oneidensis (strain MR-1) OX=211586 GN=SO_3376 PE=4 SV=1
Q8E8F3	ABC-type transporter ATPase component OS=Shewanella oneidensis (strain MR-1) OX=211586 GN=SO_4712 PE=4 SV=1
Q8ED85	N-acetylglucosamine/uracil transporter UraA OS=Shewanella oneidensis (strain MR-1) OX=211586 GN=uraA PE=4 SV=1
Q8EI81	Uncharacterized protein OS=Shewanella oneidensis (strain MR-1) OX=211586 GN=ygdR PE=1 SV=2
Q8EHH2	Peptidase U32 family YhbU OS=Shewanella oneidensis (strain MR-1) OX=211586 GN=SO_1249 PE=4 SV=1
Q8EAE3	Phosphotransferase system (PTS) sugar-specific IIA component PtsN OS=Shewanella oneidensis (strain MR-1) OX=211586 GN=ptsN PE=4 SV=1
Q8EB93	Ribosomal RNA small subunit methyltransferase A OS=Shewanella oneidensis (strain MR-1) OX=211586 GN=rsmA PE=3 SV=1
Q8EI95	tRNA1(Val) (adenine(37)-N6)-methyltransferase OS=Shewanella oneidensis (strain MR-1) OX=211586 GN=SO_0948 PE=3 SV=2
Q8EBP5	Thiamine-monophosphate kinase OS=Shewanella oneidensis (strain MR-1) OX=211586 GN=thiL PE=3 SV=1
Q8EJT2	Type I restriction enzyme R Protein OS=Shewanella oneidensis (strain MR-1) OX=211586 GN=hsdR PE=3 SV=1
Q8EIL8	Macrolide export ATP-binding/permease protein MacB OS=Shewanella oneidensis (strain MR-1) OX=211586 GN=macB PE=3 SV=1
Q8E8N0	Osmolarity-responsive two component signal transduction system response regulator OmpR OS=Shewanella oneidensis (strain MR-1) OX=211586 GN=ompR PE=4 SV=1
Q8E8A3	ParA family protein OS=Shewanella oneidensis (strain MR-1) OX=211586 GN=SO_A0006 PE=4 SV=2
Q8EKH5	Uncharacterized protein OS=Shewanella oneidensis (strain MR-1) OX=211586 GN=SO_0118 PE=4 SV=1
Q8E9F2	Uncharacterized protein OS=Shewanella oneidensis (strain MR-1) OX=211586 GN=ycaQ PE=4 SV=1
Q8EAH6	Fe hydrogenase maturation GTPase HydF OS=Shewanella oneidensis (strain MR-1) OX=211586 GN=hydF PE=4 SV=1
Q8EBB8	AAA ATPase family protein OS=Shewanella oneidensis (strain MR-1) OX=211586 GN=SO_3611 PE=4 SV=1
Q8EHJ2	Periplasmic component of the TorRS TMAO sensory system TorT OS=Shewanella oneidensis (strain MR-1) OX=211586 GN=torT PE=4 SV=1
Q8EGX6	Cytoplasmic protein in type I restriction-modifcation system locus OS=Shewanella oneidensis (strain MR-1) OX=211586 GN=SO_1462 PE=4 SV=1
Q8EHD6	tRNA N6-adenosine threonylcarbamoyltransferase OS=Shewanella oneidensis (strain MR-1) OX=211586 GN=tsaD PE=3 SV=1
Q8EEL4	Predicted lipoprotein OS=Shewanella oneidensis (strain MR-1) OX=211586 GN=SO_2365 PE=4 SV=1
Q8ECG0	O-antigen biosynthesis acetyltransferase WbnH OS=Shewanella oneidensis (strain MR-1) OX=211586 GN=wbnH PE=4 SV=1
Q8EEE7	Carboxy-S-adenosyl-L-methionine synthase OS=Shewanella oneidensis (strain MR-1) OX=211586 GN=cmoA PE=3 SV=1
Q8EHM3	Ribosomal RNA large subunit methyltransferase E OS=Shewanella oneidensis (strain MR-1) OX=211586 GN=rlmE PE=3 SV=1
Q8EC73	Bifunctional UDP GlcNAc C6 dehydratase/C5 epimerase PseB OS=Shewanella oneidensis (strain MR-1) OX=211586 GN=pseB PE=4 SV=1
Q8EIJ2	Periplasmic nitrate reductase ferredoxin component NapG OS=Shewanella oneidensis (strain MR-1) OX=211586 GN=napG PE=4 SV=1
Q8EKQ6	DNA processing protein DprA OS=Shewanella oneidensis (strain MR-1) OX=211586 GN=dprA PE=4 SV=2
Q8EBX8	tRNA (guanine-N(7)-)-methyltransferase OS=Shewanella oneidensis (strain MR-1) OX=211586 GN=trmB PE=3 SV=1
Q8ECR5	Bifunctional folylpolyglutamate synthase/dihydrofolate synthase FolC OS=Shewanella oneidensis (strain MR-1) OX=211586 GN=folC PE=3 SV=1
Q8EDB0	Transcriptional regulator of proline and 4-hydroxyproline utilization HypR OS=Shewanella oneidensis (strain MR-1) OX=211586 GN=hypR PE=4 SV=1
Q8EGN0	7TM intracellular signalling protein with GGDEF domain OS=Shewanella oneidensis (strain MR-1) OX=211586 GN=SO_1570 PE=4 SV=1
Q8EI14	Cob(I)yrinic acid a,c-diamide adenosyltransferase OS=Shewanella oneidensis (strain MR-1) OX=211586 GN=cobO PE=3 SV=1
Q8EI23	Methionine synthase OS=Shewanella oneidensis (strain MR-1) OX=211586 GN=metH PE=4 SV=1
Q8EIH5	Transcriptional activator of curli operon CsgD OS=Shewanella oneidensis (strain MR-1) OX=211586 GN=csgD PE=4 SV=2
Q8EAC0	Uncharacterized protein OS=Shewanella oneidensis (strain MR-1) OX=211586 GN=SO_3987 PE=4 SV=1
Q8EK90	Glutamate racemase OS=Shewanella oneidensis (strain MR-1) OX=211586 GN=murI PE=3 SV=1
Q8EIU0	ABC-type Fe3+ uptake system substrate-binding component FbpA OS=Shewanella oneidensis (strain MR-1) OX=211586 GN=fbpA PE=4 SV=1
Q8EBB7	Formate-dependent phosphoribosylglycinamide formyltransferase OS=Shewanella oneidensis (strain MR-1) OX=211586 GN=purT PE=3 SV=2
Q8EEM4	tRNA-cytidine(32) 2-sulfurtransferase OS=Shewanella oneidensis (strain MR-1) OX=211586 GN=ttcA PE=3 SV=1
Q8EIX9	Membrane protein FsxA OS=Shewanella oneidensis (strain MR-1) OX=211586 GN=fsxA PE=4 SV=1
Q8E9U8	Uncharacterized protein OS=Shewanella oneidensis (strain MR-1) OX=211586 GN=SO_4164 PE=4 SV=1
Q8EBI7	4-hydroxy-3-methylbut-2-enyl diphosphate reductase OS=Shewanella oneidensis (strain MR-1) OX=211586 GN=ispH PE=3 SV=1
Q8E922	Nitrogen-responsive two component signal transduction system Sigma54-dependent response regulator GlnG OS=Shewanella oneidensis (strain MR-1) OX=211586 GN=glnG PE=4 SV=1
Q8EH12	Predicted FMN-binding domain-containing lipoprotein OS=Shewanella oneidensis (strain MR-1) OX=211586 GN=SO_1419 PE=4 SV=1
P59273	UPF0227 protein SO_2251 OS=Shewanella oneidensis (strain MR-1) OX=211586 GN=SO_2251 PE=3 SV=1
Q8EK18	Cell division protein DamX OS=Shewanella oneidensis (strain MR-1) OX=211586 GN=damX PE=4 SV=1
Q8EJD8	Transcriptional activator of tryptophan biosynthesis TrpI OS=Shewanella oneidensis (strain MR-1) OX=211586 GN=trpI PE=4 SV=1
Q8EE29	Transcriptional regulator LysR family OS=Shewanella oneidensis (strain MR-1) OX=211586 GN=SO_2561 PE=4 SV=1
Q8EHZ9	Diguanylate cyclase with PAS and GAF sensory domains OS=Shewanella oneidensis (strain MR-1) OX=211586 GN=SO_1055 PE=4 SV=1
Q8EBQ5	Putative cytoplasmic protein OS=Shewanella oneidensis (strain MR-1) OX=211586 GN=SO_3454 PE=4 SV=1
K4PU33	Diguanylate cyclase/phosphodiesterase with PAS and LOV sensory domains and Chase small molecule binding site OS=Shewanella oneidensis (strain MR-1) OX=211586 GN=SO_4657 PE=4 SV=1
Q8EFH5	Cold-active zinc metallopeptidase M1 family OS=Shewanella oneidensis (strain MR-1) OX=211586 GN=SO_1997 PE=4 SV=2
Q8EBI3	Riboflavin biosynthesis protein OS=Shewanella oneidensis (strain MR-1) OX=211586 GN=ribF PE=3 SV=1
Q8EA55	Methylenetetrahydrofolate reductase OS=Shewanella oneidensis (strain MR-1) OX=211586 GN=metF PE=3 SV=1
Q8EB72	Sigma54-dependent transcriptional regulator with PAS sensory domain Fis family OS=Shewanella oneidensis (strain MR-1) OX=211586 GN=SO_3660 PE=4 SV=1
Q8EAS2	Diguanylate phosphodiesterase OS=Shewanella oneidensis (strain MR-1) OX=211586 GN=SO_3821 PE=4 SV=1
Q8EFM5	Two component signal transduction system histidine kinase PhoQ OS=Shewanella oneidensis (strain MR-1) OX=211586 GN=phoQ PE=4 SV=1
Q8E8X8	Putative periplasmic protein OS=Shewanella oneidensis (strain MR-1) OX=211586 GN=SO_4522 PE=4 SV=1
Q8EKH9	Uncharacterized protein OS=Shewanella oneidensis (strain MR-1) OX=211586 GN=SO_0114 PE=4 SV=1
Q8E8D6	Uncharacterized protein OS=Shewanella oneidensis (strain MR-1) OX=211586 GN=SO_4729 PE=4 SV=1
Q8EI73	Putative cytoplasmic protein OS=Shewanella oneidensis (strain MR-1) OX=211586 GN=SO_0974 PE=4 SV=2
Q8E9S3	Esterase/lipase/thioesterase family protein OS=Shewanella oneidensis (strain MR-1) OX=211586 GN=SO_4193 PE=4 SV=1
Q8EG08	Sigma 54-dependent transcriptional activator of phage shock response PspF OS=Shewanella oneidensis (strain MR-1) OX=211586 GN=pspF PE=4 SV=1
Q8E8B2	Chromosome partitioning protein ParB OS=Shewanella oneidensis (strain MR-1) OX=211586 GN=parB PE=3 SV=1
Q8EB22	ABC-type monosaccharide transport system substrate binding component OS=Shewanella oneidensis (strain MR-1) OX=211586 GN=SO_3714 PE=4 SV=1
Q8ECH4	DnaJ domain protein OS=Shewanella oneidensis (strain MR-1) OX=211586 GN=SO_3168 PE=4 SV=1
Q8E9F1	Uncharacterized protein OS=Shewanella oneidensis (strain MR-1) OX=211586 GN=SO_4333 PE=4 SV=1
Q8E8K8	Sulfate/thiosulfate import ATP-binding protein CysA 2 OS=Shewanella oneidensis (strain MR-1) OX=211586 GN=cysA2 PE=3 SV=1
Q8E8J1	L-threonine 3-dehydrogenase OS=Shewanella oneidensis (strain MR-1) OX=211586 GN=tdh PE=3 SV=1
Q8E8E4	ABC-type tungstate uptake system ATPase componet TupC OS=Shewanella oneidensis (strain MR-1) OX=211586 GN=tupC PE=4 SV=1
Q8E967	Uncharacterized protein OS=Shewanella oneidensis (strain MR-1) OX=211586 GN=SO_4419 PE=4 SV=1
Q8CVD3	Periplasmic [Ni-Fe] hydrogenase small subunit HyaA OS=Shewanella oneidensis (strain MR-1) OX=211586 GN=hyaA PE=4 SV=1
Q8E8T6	Transcriptional regulator LysR family OS=Shewanella oneidensis (strain MR-1) OX=211586 GN=SO_4571 PE=4 SV=1
K4PU38	Inner membrane 4Fe-4S ferredoxin OS=Shewanella oneidensis (strain MR-1) OX=211586 GN=SO_3662 PE=4 SV=1
Q8E948	Two component signal transduction system hybrid histidine kinase/response regulator OS=Shewanella oneidensis (strain MR-1) OX=211586 GN=SO_4445 PE=4 SV=1
Q8EB26	ABC-type cobalamin uptake system substrate-binding component BtuF OS=Shewanella oneidensis (strain MR-1) OX=211586 GN=btuF PE=4 SV=2
Q8E8A8	Plasmid replication initiation protein RepA OS=Shewanella oneidensis (strain MR-1) OX=211586 GN=repA PE=4 SV=1
Q8EI67	23S rRNA (uracil(747)-C(5))-methyltransferase RlmC OS=Shewanella oneidensis (strain MR-1) OX=211586 GN=rlmC PE=3 SV=2
Q8EIY4	Aldose 1-epimerase OS=Shewanella oneidensis (strain MR-1) OX=211586 GN=galM PE=3 SV=1
Q8EIK0	Transcriptional regulator LysR family OS=Shewanella oneidensis (strain MR-1) OX=211586 GN=SO_0839 PE=4 SV=1
Q8EE25	Intracellular proteinase inhibitor domain protein OS=Shewanella oneidensis (strain MR-1) OX=211586 GN=SO_2565 PE=4 SV=1
Q8E9X2	Transcriptional regulator LysR family OS=Shewanella oneidensis (strain MR-1) OX=211586 GN=SO_4140 PE=4 SV=2
Q8EFT8	Glycine cleavage system transcriptional repressor GcvR OS=Shewanella oneidensis (strain MR-1) OX=211586 GN=gcvR PE=4 SV=1
Q8EHM5	Protein-export membrane protein SecF OS=Shewanella oneidensis (strain MR-1) OX=211586 GN=secF PE=3 SV=1
Q8EDC0	Subfamily M23B unassigned peptidase OS=Shewanella oneidensis (strain MR-1) OX=211586 GN=SO_2842 PE=4 SV=2
Q0KHM9	Bacteriocin immunity protein OS=Shewanella oneidensis (strain MR-1) OX=211586 GN=SO_A0176 PE=4 SV=1
Q8E9D0	Uncharacterized protein OS=Shewanella oneidensis (strain MR-1) OX=211586 GN=SO_4354 PE=4 SV=2
Q8EA80	Drug:H+ antiporter DHA1 family OS=Shewanella oneidensis (strain MR-1) OX=211586 GN=SO_4029 PE=4 SV=1
Q8EH97	Phosphotransferase system (PTS) enzyme I PtsP OS=Shewanella oneidensis (strain MR-1) OX=211586 GN=ptsP PE=3 SV=1
Q8EAU4	Peptidase U32 family YdcP OS=Shewanella oneidensis (strain MR-1) OX=211586 GN=ydcP PE=4 SV=1
Q8EH92	Predicted periplasmic protein OS=Shewanella oneidensis (strain MR-1) OX=211586 GN=SO_1337 PE=4 SV=1
Q8EBD0	Two component signal transduction system histidine kinase RstB OS=Shewanella oneidensis (strain MR-1) OX=211586 GN=rstB PE=4 SV=2
Q8EEK1	ATP-dependent DNA helicase RecQ family OS=Shewanella oneidensis (strain MR-1) OX=211586 GN=SO_2380 PE=4 SV=1
Q8E8V4	Bifunctional diguanylate cyclase with PAS sensory domain/signalling protein with EAL domain OS=Shewanella oneidensis (strain MR-1) OX=211586 GN=SO_4552 PE=4 SV=1
Q8ECL4	Chemotaxis signal transduction system response regulator CheV OS=Shewanella oneidensis (strain MR-1) OX=211586 GN=cheV PE=4 SV=1
Q8EH28	UPF0597 protein SO_1403 OS=Shewanella oneidensis (strain MR-1) OX=211586 GN=SO_1403 PE=3 SV=1
Q8EIB1	Phosphoglycerate kinase OS=Shewanella oneidensis (strain MR-1) OX=211586 GN=pgk PE=3 SV=1
Q8E8S4	Ribosomal RNA small subunit methyltransferase D OS=Shewanella oneidensis (strain MR-1) OX=211586 GN=rsmD PE=3 SV=2
Q8E8Z3	Formate dehydrogenase chaperone FdhT OS=Shewanella oneidensis (strain MR-1) OX=211586 GN=fdhT PE=4 SV=1
Q8EGH2	Ribosome-recycling factor OS=Shewanella oneidensis (strain MR-1) OX=211586 GN=frr PE=3 SV=1
Q8EHU2	Glutamate 5-kinase OS=Shewanella oneidensis (strain MR-1) OX=211586 GN=proB PE=3 SV=1
Q8ECS7	Proline iminopeptidase Pip OS=Shewanella oneidensis (strain MR-1) OX=211586 GN=pip PE=4 SV=2
Q8EAD3	Ser/Thr protein kinase OS=Shewanella oneidensis (strain MR-1) OX=211586 GN=SO_3973 PE=4 SV=1
Q8E8R5	Copper efflux pump periplasmic metallochaperone CusF OS=Shewanella oneidensis (strain MR-1) OX=211586 GN=cusF PE=4 SV=1
Q8EIC8	Ankyrin domain protein OS=Shewanella oneidensis (strain MR-1) OX=211586 GN=SO_0915 PE=4 SV=1
Q8EC93	Chemotaxis signal transduction system MCP methyltransferase CheR OS=Shewanella oneidensis (strain MR-1) OX=211586 GN=cheR PE=4 SV=2
Q8EF83	FAD:protein FMN transferase OS=Shewanella oneidensis (strain MR-1) OX=211586 GN=SO_2103 PE=3 SV=2
Q8EIP1	Diguanylate cyclase OS=Shewanella oneidensis (strain MR-1) OX=211586 GN=SO_0796 PE=4 SV=2
Q8E981	Catalase-peroxidase 1 OS=Shewanella oneidensis (strain MR-1) OX=211586 GN=katG1 PE=3 SV=1
P59188	Protein FdhE homolog OS=Shewanella oneidensis (strain MR-1) OX=211586 GN=fdhE PE=3 SV=1
K4PW05	Multifunctional CCA protein OS=Shewanella oneidensis (strain MR-1) OX=211586 GN=cca PE=3 SV=1
Q8EF08	Diguanylate cyclase OS=Shewanella oneidensis (strain MR-1) OX=211586 GN=SO_2197 PE=4 SV=1
Q8EIL1	Ribosomal RNA small subunit methyltransferase C OS=Shewanella oneidensis (strain MR-1) OX=211586 GN=rsmC PE=3 SV=2
Q8EEP8	Uncharacterized protein OS=Shewanella oneidensis (strain MR-1) OX=211586 GN=SO_2329 PE=4 SV=1
Q8EC90	Flagellar biosynthesis anti-sigma factor FlgM OS=Shewanella oneidensis (strain MR-1) OX=211586 GN=flgM PE=4 SV=1
Q8EF90	NiFe hydrogenase assembly chaperone HyaE OS=Shewanella oneidensis (strain MR-1) OX=211586 GN=hyaE PE=4 SV=2
Q8EGQ9	Ribosomal RNA large subunit methyltransferase M OS=Shewanella oneidensis (strain MR-1) OX=211586 GN=rlmM PE=3 SV=1
Q8EF71	Bifunctional isoaspartyl dipeptidase / l-asparaginase IaaA OS=Shewanella oneidensis (strain MR-1) OX=211586 GN=iaaA PE=4 SV=2
Q8EJN6	Bifunctional diguanylate cyclase / phosphodiesterase with PAS sensory domain OS=Shewanella oneidensis (strain MR-1) OX=211586 GN=SO_0427 PE=4 SV=1
Q8E928	Chemotaxis signal transduction system methyl accepting sensory transducer OS=Shewanella oneidensis (strain MR-1) OX=211586 GN=SO_4466 PE=4 SV=1
Q8EJX7	Predicted lipoprotein OS=Shewanella oneidensis (strain MR-1) OX=211586 GN=SO_0329 PE=4 SV=2
Q8EE31	DNA polymerase III subunit epsilon OS=Shewanella oneidensis (strain MR-1) OX=211586 GN=dnaQ PE=4 SV=1
Q8E9W2	Sulphate transporter OS=Shewanella oneidensis (strain MR-1) OX=211586 GN=SO_4150 PE=4 SV=2
Q8EA37	Ribosomal protein S12 methylthiotransferase RimO OS=Shewanella oneidensis (strain MR-1) OX=211586 GN=rimO PE=3 SV=1
Q8EDG9	50S ribosomal protein L32 OS=Shewanella oneidensis (strain MR-1) OX=211586 GN=rpmF PE=3 SV=1
Q8EJS0	Predicted lipoprotein OS=Shewanella oneidensis (strain MR-1) OX=211586 GN=SO_0392 PE=4 SV=1
Q8EEX4	Phosphoenolpyruvate-protein phosphotransferase OS=Shewanella oneidensis (strain MR-1) OX=211586 GN=ptsI PE=3 SV=1
Q8EJB0	Protein GumN OS=Shewanella oneidensis (strain MR-1) OX=211586 GN=gumN PE=4 SV=1
Q8E8G6	Uncharacterized protein OS=Shewanella oneidensis (strain MR-1) OX=211586 GN=SO_4698 PE=4 SV=1
Q8EB00	Sulfite reductase [NADPH] hemoprotein beta-component OS=Shewanella oneidensis (strain MR-1) OX=211586 GN=cysI PE=3 SV=1
Q8EGK6	Uncharacterized protein OS=Shewanella oneidensis (strain MR-1) OX=211586 GN=SO_1595 PE=4 SV=1
Q8EC95	Flagellar basal-body rod protein FlgC OS=Shewanella oneidensis (strain MR-1) OX=211586 GN=flgC PE=3 SV=1
Q8EFS8	Uncharacterized protein OS=Shewanella oneidensis (strain MR-1) OX=211586 GN=SO_1888 PE=4 SV=2
Q8EGJ2	Zn-ribbon-containing possibly nucleic-acid-binding protein DUF2310 OS=Shewanella oneidensis (strain MR-1) OX=211586 GN=SO_1610 PE=4 SV=1
Q8EG94	Transcriptional regulator OS=Shewanella oneidensis (strain MR-1) OX=211586 GN=SO_1712 PE=4 SV=1
Q8EGE6	Uncharacterized protein OS=Shewanella oneidensis (strain MR-1) OX=211586 GN=SO_1658 PE=4 SV=1
Q8EKE1	Uncharacterized protein OS=Shewanella oneidensis (strain MR-1) OX=211586 GN=SO_0154 PE=4 SV=1
Q8ECR3	Aspartate-semialdehyde dehydrogenase OS=Shewanella oneidensis (strain MR-1) OX=211586 GN=asd PE=3 SV=1
Q8EE26	Membrane-bound lytic peptidoglycan transglycosylase D OS=Shewanella oneidensis (strain MR-1) OX=211586 GN=SO_2564 PE=4 SV=1
Q8EFV5	Two component signal transduction system response regulator UvrY OS=Shewanella oneidensis (strain MR-1) OX=211586 GN=uvrY PE=4 SV=1
Q8EBT9	Uncharacterized protein OS=Shewanella oneidensis (strain MR-1) OX=211586 GN=SO_3410 PE=4 SV=1
Q8EIH1	Uncharacterized protein OS=Shewanella oneidensis (strain MR-1) OX=211586 GN=SO_0868 PE=4 SV=1
Q8EKB2	Acteyltransferase GNAT family OS=Shewanella oneidensis (strain MR-1) OX=211586 GN=SO_0183 PE=4 SV=1
Q8ED26	Lambda phage tail fiber protein OS=Shewanella oneidensis (strain MR-1) OX=211586 GN=SO_2945 PE=4 SV=1
Q8ED16	Lambda phage minor tail protein G OS=Shewanella oneidensis (strain MR-1) OX=211586 GN=G PE=4 SV=1
Q8EH22	SAM-dependent methyltransferase OS=Shewanella oneidensis (strain MR-1) OX=211586 GN=SO_1409 PE=4 SV=1
Q8E9Y7	Arginine--tRNA ligase OS=Shewanella oneidensis (strain MR-1) OX=211586 GN=argS PE=3 SV=1
Q8EDF1	Tetraacyldisaccharide 4-kinase OS=Shewanella oneidensis (strain MR-1) OX=211586 GN=lpxK PE=3 SV=1
Q8EI26	Predicted periplasmic protein OS=Shewanella oneidensis (strain MR-1) OX=211586 GN=SO_1027 PE=4 SV=1
Q8EHN6	2-octaprenyl-3-methyl-6-methoxy-14-benzoquinone hydroxylase UbiF OS=Shewanella oneidensis (strain MR-1) OX=211586 GN=ubiF PE=4 SV=1
Q8E936	Diguanylate cyclase OS=Shewanella oneidensis (strain MR-1) OX=211586 GN=SO_4457 PE=4 SV=1
Q8EDC7	Uncharacterized protein OS=Shewanella oneidensis (strain MR-1) OX=211586 GN=SO_2835 PE=4 SV=2
Q8EJ45	Bifunctional diguanylate cyclase/phosphodiesterase OS=Shewanella oneidensis (strain MR-1) OX=211586 GN=SO_0628 PE=4 SV=1
Q8EKI0	Uncharacterized protein OS=Shewanella oneidensis (strain MR-1) OX=211586 GN=SO_0113 PE=4 SV=2
Q8EI88	Alkyl hydroperoxide reductase flavoprotein component AhpF OS=Shewanella oneidensis (strain MR-1) OX=211586 GN=ahpF PE=3 SV=1
Q8E917	Periplasmic stress-responsive two component signal transduction system histidine kinase CpxA OS=Shewanella oneidensis (strain MR-1) OX=211586 GN=cpxA PE=4 SV=1
Q8EA86	Periplasmic peptidase family M16B OS=Shewanella oneidensis (strain MR-1) OX=211586 GN=SO_4022 PE=4 SV=1
Q8EH48	Uncharacterized protein OS=Shewanella oneidensis (strain MR-1) OX=211586 GN=SO_1382 PE=4 SV=1
Q8EG10	ABC-type peptide uptake system permease component 1 SapB OS=Shewanella oneidensis (strain MR-1) OX=211586 GN=sapB PE=3 SV=1
Q8EIQ8	Aminomethyltransferase OS=Shewanella oneidensis (strain MR-1) OX=211586 GN=gcvT PE=3 SV=1
Q8EGN5	Magnesium transporter MgtE family OS=Shewanella oneidensis (strain MR-1) OX=211586 GN=SO_1565 PE=1 SV=1
Q8EKD2	33 kDa chaperonin OS=Shewanella oneidensis (strain MR-1) OX=211586 GN=hslO PE=3 SV=1
Q8EIM6	Uncharacterized protein OS=Shewanella oneidensis (strain MR-1) OX=211586 GN=SO_0812 PE=4 SV=1
K4PSJ0	Glutamate--tRNA ligase OS=Shewanella oneidensis (strain MR-1) OX=211586 GN=gltX PE=3 SV=1
Q8EAC6	Histidine kinase OS=Shewanella oneidensis (strain MR-1) OX=211586 GN=narQ PE=4 SV=2
Q8EKF9	Ribosomal RNA large subunit methyltransferase F OS=Shewanella oneidensis (strain MR-1) OX=211586 GN=rlmF PE=3 SV=2
Q8EFA2	Chemotaxis signal transduction system methyl accepting sensory transducer OS=Shewanella oneidensis (strain MR-1) OX=211586 GN=SO_2083 PE=4 SV=1
Q8ED53	Predicted lipoprotein OS=Shewanella oneidensis (strain MR-1) OX=211586 GN=SO_2917 PE=4 SV=1
Q8EIF2	Putative agmatine deiminase OS=Shewanella oneidensis (strain MR-1) OX=211586 GN=aguA PE=3 SV=2
K4PW12	Lambda phage uncharacterized protein OS=Shewanella oneidensis (strain MR-1) OX=211586 GN=SO_4790 PE=4 SV=1
Q8EC33	Histidine--tRNA ligase OS=Shewanella oneidensis (strain MR-1) OX=211586 GN=hisS PE=3 SV=1
Q8EGI6	Uncharacterized protein OS=Shewanella oneidensis (strain MR-1) OX=211586 GN=SO_1617 PE=4 SV=1
Q8EI11	ABC-type arginine uptakesystem ATPase component ArtM OS=Shewanella oneidensis (strain MR-1) OX=211586 GN=artM PE=4 SV=1
Q8EIL2	Lactate transport protein LctP family OS=Shewanella oneidensis (strain MR-1) OX=211586 GN=SO_0827 PE=4 SV=1
Q8EH67	Hydroxylamine reductase OS=Shewanella oneidensis (strain MR-1) OX=211586 GN=hcp PE=3 SV=1
Q8EJT9	Type III restriction-modification system restriction subunit Res OS=Shewanella oneidensis (strain MR-1) OX=211586 GN=res PE=4 SV=2
Q8EJX1	Cell division protein ZapB OS=Shewanella oneidensis (strain MR-1) OX=211586 GN=zapB PE=3 SV=1
Q8EHG1	Extracellular solute-binding protein family 3 OS=Shewanella oneidensis (strain MR-1) OX=211586 GN=SO_1260 PE=4 SV=1
Q8EGA4	Uncharacterized protein OS=Shewanella oneidensis (strain MR-1) OX=211586 GN=SO_1701 PE=4 SV=1
Q8EG93	Putative lipoprotein OS=Shewanella oneidensis (strain MR-1) OX=211586 GN=SO_1713 PE=4 SV=1
Q8EEU4	Ferredoxin 2Fe-2S type ISC system Fdx OS=Shewanella oneidensis (strain MR-1) OX=211586 GN=fdx PE=4 SV=1
Q8EGJ7	Lipoprotein OS=Shewanella oneidensis (strain MR-1) OX=211586 GN=SO_1605 PE=4 SV=1
Q8EHB1	NTF2-like superfamily protein OS=Shewanella oneidensis (strain MR-1) OX=211586 GN=SO_1318 PE=4 SV=1
Q8EHY4	Catalase OS=Shewanella oneidensis (strain MR-1) OX=211586 GN=katB PE=3 SV=1
Q8ED13	Lambda phage protein HK97-gp10 family OS=Shewanella oneidensis (strain MR-1) OX=211586 GN=SO_2958 PE=4 SV=1
Q8EHV6	Na(+)-translocating NADH-quinone reductase subunit D OS=Shewanella oneidensis (strain MR-1) OX=211586 GN=nqrD PE=3 SV=1
P59175	2,3-bisphosphoglycerate-independent phosphoglycerate mutase OS=Shewanella oneidensis (strain MR-1) OX=211586 GN=gpmI PE=3 SV=1
Q8EGG3	Acyl-[acyl-carrier-protein]--UDP-N-acetylglucosamine O-acyltransferase OS=Shewanella oneidensis (strain MR-1) OX=211586 GN=lpxA PE=3 SV=1
Q8E9X1	Oxidoreductase short-chain dehydrogenase/reductase family OS=Shewanella oneidensis (strain MR-1) OX=211586 GN=SO_4141 PE=3 SV=1
Q8E9P7	Probable peptidoglycan glycosyltransferase FtsW OS=Shewanella oneidensis (strain MR-1) OX=211586 GN=ftsW PE=3 SV=1
Q8E8Z7	Sulfur carrier protein FdhD OS=Shewanella oneidensis (strain MR-1) OX=211586 GN=fdhD PE=3 SV=2
Q8EHP2	PilD processed protein OS=Shewanella oneidensis (strain MR-1) OX=211586 GN=SO_1176 PE=4 SV=1
Q8E8P6	Cytochrome c oxidase biogenesis protein SenC OS=Shewanella oneidensis (strain MR-1) OX=211586 GN=senC PE=4 SV=1
Q8EH84	Sigma E factor positive regulatory protein RseC OS=Shewanella oneidensis (strain MR-1) OX=211586 GN=rseC PE=4 SV=1
Q8EJY7	Uncharacterized protein OS=Shewanella oneidensis (strain MR-1) OX=211586 GN=SO_0319 PE=4 SV=2
Q8ECJ7	Electron transfer flavoprotein beta subunit EtfB OS=Shewanella oneidensis (strain MR-1) OX=211586 GN=etfB PE=4 SV=1
Q8E903	Uncharacterized protein OS=Shewanella oneidensis (strain MR-1) OX=211586 GN=SO_4492 PE=4 SV=1
Q8EK32	Nicotinamide-nucleotide amidohydrolase PncC OS=Shewanella oneidensis (strain MR-1) OX=211586 GN=pncC PE=1 SV=1
Q8EIZ6	Mu phage uncharacterized protein OS=Shewanella oneidensis (strain MR-1) OX=211586 GN=SO_0679 PE=4 SV=1
Q8EKM5	Penicillin binding protein 1C PbpC OS=Shewanella oneidensis (strain MR-1) OX=211586 GN=pbpC PE=4 SV=1
Q8ECG3	O-antigen polymerase Wzy OS=Shewanella oneidensis (strain MR-1) OX=211586 GN=wzy PE=4 SV=1
Q8EHJ1	Histidine kinase OS=Shewanella oneidensis (strain MR-1) OX=211586 GN=torS PE=4 SV=1
Q8ECZ7	Lambda phage pyridoxal phosphate dependent enzyme OS=Shewanella oneidensis (strain MR-1) OX=211586 GN=SO_2974 PE=4 SV=1
Q8EGS0	Protein GrpE OS=Shewanella oneidensis (strain MR-1) OX=211586 GN=grpE PE=3 SV=1
Q8EDZ0	Alanyl aminopeptidase PepN OS=Shewanella oneidensis (strain MR-1) OX=211586 GN=pepN PE=4 SV=1
Q8EDT8	Mu phage transposase OrfB TnpB_MuSo2 OS=Shewanella oneidensis (strain MR-1) OX=211586 GN=tnpB PE=4 SV=1
K4PSQ6	ABC-type drugE1 family efflux system ATPase component OS=Shewanella oneidensis (strain MR-1) OX=211586 GN=SO_1706 PE=4 SV=1
Q8E8M9	Osmolarity-responsive two component signal transduction system histidine kinase EnvZ OS=Shewanella oneidensis (strain MR-1) OX=211586 GN=envZ PE=4 SV=1
Q8EFN5	Regulator of nucleoside diphosphate kinase Rnk OS=Shewanella oneidensis (strain MR-1) OX=211586 GN=rnk PE=4 SV=1
CON__P35527
CON__P08779
Q8EGK2	Multi-domain beta-ketoacyl synthase PfaC OS=Shewanella oneidensis (strain MR-1) OX=211586 GN=pfaC PE=3 SV=1
Q8EIA8	Sodium:proton antiporter NhaD OS=Shewanella oneidensis (strain MR-1) OX=211586 GN=nhaD PE=4 SV=2
Q8EAX0	Phosphate transporter OS=Shewanella oneidensis (strain MR-1) OX=211586 GN=SO_3771 PE=3 SV=2
Q8EEX0	Uncharacterized protein OS=Shewanella oneidensis (strain MR-1) OX=211586 GN=SO_2241 PE=4 SV=1
Q8EHW5	Ribosomal RNA large subunit methyltransferase G OS=Shewanella oneidensis (strain MR-1) OX=211586 GN=rlmG PE=3 SV=1
Q8EI41	NADH-quinone oxidoreductase subunit N OS=Shewanella oneidensis (strain MR-1) OX=211586 GN=nuoN PE=3 SV=1
Q8EI49	Calcium:proton antiporter ChaA OS=Shewanella oneidensis (strain MR-1) OX=211586 GN=chaA PE=4 SV=1
Q8EI99	Radical SAM protein TatD family-associated OS=Shewanella oneidensis (strain MR-1) OX=211586 GN=SO_0944 PE=4 SV=2
Q8EA31	Microcin-processing peptidase TldE OS=Shewanella oneidensis (strain MR-1) OX=211586 GN=tldE PE=4 SV=1
Q8E9K8	Phage P1-related protein in restrction modification operon RflA OS=Shewanella oneidensis (strain MR-1) OX=211586 GN=rflA PE=4 SV=1
Q8E9N9	Transcriptional regulator MraZ OS=Shewanella oneidensis (strain MR-1) OX=211586 GN=mraZ PE=3 SV=1
Q8E9U1	Oxygen-responsive two component signal transduction system controlling redox affected systems response regulator PrrA OS=Shewanella oneidensis (strain MR-1) OX=211586 GN=prrA PE=4 SV=1
Q8EIG2	Acteyltransferase GNAT family OS=Shewanella oneidensis (strain MR-1) OX=211586 GN=SO_0877 PE=4 SV=2
Q8E8D9	Formamidopyrimidine-DNA glycosylase OS=Shewanella oneidensis (strain MR-1) OX=211586 GN=mutM PE=3 SV=3
Q8EAV9	Uncharacterized protein OS=Shewanella oneidensis (strain MR-1) OX=211586 GN=SO_3782 PE=4 SV=2
Q8EDA6	Putative nucleotidyltransferase DUF294 OS=Shewanella oneidensis (strain MR-1) OX=211586 GN=SO_2856 PE=4 SV=1
Q8EEP4	Putative esterase YbfF OS=Shewanella oneidensis (strain MR-1) OX=211586 GN=ybfF PE=4 SV=2
Q8E8F9	Transcriptional repressor Xre family OS=Shewanella oneidensis (strain MR-1) OX=211586 GN=SO_4705 PE=4 SV=2
Q8EC75	Flagellin modification protein OS=Shewanella oneidensis (strain MR-1) OX=211586 GN=SO_3269 PE=4 SV=1
K4PW21	Uncharacterized protein OS=Shewanella oneidensis (strain MR-1) OX=211586 GN=SO_4812 PE=4 SV=1
CON__P15636
Q8EDC8	Anaerobic ribonucleoside-triphosphate reductase NrdD OS=Shewanella oneidensis (strain MR-1) OX=211586 GN=nrdD PE=4 SV=1
Q8EA08	MSHA secretion apparatus component MshP OS=Shewanella oneidensis (strain MR-1) OX=211586 GN=mshP PE=4 SV=1
Q8EAR8	Uncharacterized protein OS=Shewanella oneidensis (strain MR-1) OX=211586 GN=SO_3828 PE=4 SV=1
Q8EER7	50S ribosomal protein L35 OS=Shewanella oneidensis (strain MR-1) OX=211586 GN=rpmI PE=3 SV=1
K4PW07	Molybdenum-pterin binding protein MopI OS=Shewanella oneidensis (strain MR-1) OX=211586 GN=mopI PE=4 SV=1
P59251	Glycerol-3-phosphate acyltransferase OS=Shewanella oneidensis (strain MR-1) OX=211586 GN=plsY PE=3 SV=1
Q8EHA4	NADPH-dependent glutamate synthase large subunit GltB OS=Shewanella oneidensis (strain MR-1) OX=211586 GN=gltB PE=4 SV=1
CON__P01045-1;CON__Q2KJ62;CON__P01044-1	;;
REV__Q8EAH5	50S ribosomal protein L9 OS=Shewanella oneidensis (strain MR-1) OX=211586 GN=rplI PE=3 SV=1
REV__Q8EGU5	Alpha-1,4 glucan phosphorylase OS=Shewanella oneidensis (strain MR-1) OX=211586 GN=glgP PE=3 SV=1
Q8E887	Uncharacterized protein OS=Shewanella oneidensis (strain MR-1) OX=211586 GN=SO_A0033 PE=4 SV=1
Q8E8D8	Methyltransferase type 11 associated with YihI OS=Shewanella oneidensis (strain MR-1) OX=211586 GN=SO_4727 PE=4 SV=1
Q8EAT8	Flavin prenyltransferase UbiX OS=Shewanella oneidensis (strain MR-1) OX=211586 GN=ubiX PE=3 SV=1
Q8EB63	TonB1 energy transduction system for heme uptake inner membrane component ExbB OS=Shewanella oneidensis (strain MR-1) OX=211586 GN=exbB PE=3 SV=1
Q8EB75	Putative amino acid efflux permease RhtB family OS=Shewanella oneidensis (strain MR-1) OX=211586 GN=SO_3657 PE=4 SV=2
Q8EFE4	Integron integrase IntI OS=Shewanella oneidensis (strain MR-1) OX=211586 GN=intI PE=3 SV=1
Q8EHG9	Peptidase U32 family YegQ OS=Shewanella oneidensis (strain MR-1) OX=211586 GN=yegQ PE=4 SV=1
Q8EI37	NADH-ubiquinone oxidoreductase subunit J NuoJ OS=Shewanella oneidensis (strain MR-1) OX=211586 GN=nuoJ PE=3 SV=1
Q8EIX6	Transcriptional regulator LysR family OS=Shewanella oneidensis (strain MR-1) OX=211586 GN=SO_0701 PE=4 SV=1
P59292	Amino-acid acetyltransferase OS=Shewanella oneidensis (strain MR-1) OX=211586 GN=argA PE=3 SV=1
Q8E8F4	Cyclic di-GMP hydrolase OS=Shewanella oneidensis (strain MR-1) OX=211586 GN=SO_4711 PE=4 SV=1
Q8EGT1;Q8EFS6;Q8E8X1	Uncharacterized protein OS=Shewanella oneidensis (strain MR-1) OX=211586 GN=SO_1510 PE=4 SV=1;Uncharacterized protein OS=Shewanella oneidensis (strain MR-1) OX=211586 GN=SO_1890 PE=4 SV=1;Uncharacterized protein OS=Shewanella oneidensis (strain MR-1) OX=21
Q8E8Z5	Uncharacterized protein OS=Shewanella oneidensis (strain MR-1) OX=211586 GN=SO_4505 PE=4 SV=1
Q8E937	MoCo-dependent hydroxylamine resistance protein YiiM OS=Shewanella oneidensis (strain MR-1) OX=211586 GN=yiiM PE=4 SV=1
Q8E969	Anaerobic C4-dicarboxylate transporter OS=Shewanella oneidensis (strain MR-1) OX=211586 GN=dcuB PE=3 SV=1
Q8E9H5	Diaminopimelate epimerase OS=Shewanella oneidensis (strain MR-1) OX=211586 GN=dapF PE=3 SV=1
Q8E9M8	ATP-dependent DNA helicase RecQ OS=Shewanella oneidensis (strain MR-1) OX=211586 GN=recQ PE=4 SV=1
Q8EA71;Q8EA73	Uncharacterized protein OS=Shewanella oneidensis (strain MR-1) OX=211586 GN=SO_4038 PE=4 SV=1;Uncharacterized protein OS=Shewanella oneidensis (strain MR-1) OX=211586 GN=SO_4036 PE=4 SV=1
Q8EAN7	Epoxyqueuosine reductase OS=Shewanella oneidensis (strain MR-1) OX=211586 GN=queG PE=3 SV=1
Q8EAW6	Uncharacterized protein OS=Shewanella oneidensis (strain MR-1) OX=211586 GN=SO_3775 PE=4 SV=2
Q8EB97	Cell wall phosphotransferase OS=Shewanella oneidensis (strain MR-1) OX=211586 GN=SO_3635 PE=4 SV=2
Q8EBA4	Transcriptional repressor of flavocytochrome c TetR family OS=Shewanella oneidensis (strain MR-1) OX=211586 GN=SO_3627 PE=4 SV=1
Q8EBH6	UPF0246 protein SO_3540 OS=Shewanella oneidensis (strain MR-1) OX=211586 GN=SO_3540 PE=3 SV=1
Q8ECH6	Toxin-antitoxin system toxin HepN family OS=Shewanella oneidensis (strain MR-1) OX=211586 GN=SO_3166 PE=4 SV=1
Q8ECH8	Putative histidine degradation protein HutD OS=Shewanella oneidensis (strain MR-1) OX=211586 GN=hutD PE=4 SV=1
Q8ECL6	Uncharacterized protein OS=Shewanella oneidensis (strain MR-1) OX=211586 GN=SO_3121 PE=4 SV=1
Q8ECM0	Acyl carrier protein phosphodiesterase AcpH-like protein OS=Shewanella oneidensis (strain MR-1) OX=211586 GN=SO_3116 PE=4 SV=1
Q8EDY8	RNA chaperone ProQ OS=Shewanella oneidensis (strain MR-1) OX=211586 GN=proQ PE=3 SV=1
Q8EE47	Two component signal transduction system histidine kinase OS=Shewanella oneidensis (strain MR-1) OX=211586 GN=SO_2543 PE=4 SV=1
Q8EE90	Bifunctional diguanylate cyclase/phosphodiesterase with GAF and PAS sensory domains OS=Shewanella oneidensis (strain MR-1) OX=211586 GN=SO_2498 PE=4 SV=2
Q8EEH3	Transcriptional regulator LysR family OS=Shewanella oneidensis (strain MR-1) OX=211586 GN=SO_2409 PE=4 SV=1
Q8EEH4	Glycine radical enzyme activase YjjW family OS=Shewanella oneidensis (strain MR-1) OX=211586 GN=SO_2408 PE=4 SV=1
Q8EEU7	Iron-binding protein IscA OS=Shewanella oneidensis (strain MR-1) OX=211586 GN=iscA PE=3 SV=1
Q8EF82	AI-3-responsive two component signal transduction system response regulator QseB OS=Shewanella oneidensis (strain MR-1) OX=211586 GN=qseB PE=4 SV=1
Q8EF96	Hydrogenase maturation factor HypA OS=Shewanella oneidensis (strain MR-1) OX=211586 GN=hypA PE=3 SV=1
Q8EFB3	Histidine biosynthesis bifunctional protein HisB OS=Shewanella oneidensis (strain MR-1) OX=211586 GN=hisB PE=3 SV=1
Q8EFF8	Recombination protein RecR OS=Shewanella oneidensis (strain MR-1) OX=211586 GN=recR PE=3 SV=1
Q8EG51	Transcriptional repressor DeoR family OS=Shewanella oneidensis (strain MR-1) OX=211586 GN=SO_1758 PE=4 SV=1
Q8EGD7	Putative pterin-4-alpha-carbinolamine dehydratase OS=Shewanella oneidensis (strain MR-1) OX=211586 GN=SO_1667 PE=3 SV=1
Q8EGF8	Diguanylate cyclase OS=Shewanella oneidensis (strain MR-1) OX=211586 GN=SO_1646 PE=4 SV=1
Q8EGJ5	Transcriptional regulator LysR family OS=Shewanella oneidensis (strain MR-1) OX=211586 GN=SO_1607 PE=4 SV=1
Q8EH00	Extracellular dimethyl sulfoxide/manganese oxide reductase accessory protein DmsH OS=Shewanella oneidensis (strain MR-1) OX=211586 GN=dmsH PE=4 SV=1
Q8EH11	Metal-induced outer membrane porin IfcO family OS=Shewanella oneidensis (strain MR-1) OX=211586 GN=SO_1420 PE=4 SV=1
Q8EH56	Acteyltransferase GNAT family OS=Shewanella oneidensis (strain MR-1) OX=211586 GN=SO_1374 PE=4 SV=2
Q8EHJ6	C-di-GMP-binding protein OS=Shewanella oneidensis (strain MR-1) OX=211586 GN=SO_1225 PE=4 SV=1
Q8EHT9	Cys-tRNA(Pro)/Cys-tRNA(Cys) deacylase OS=Shewanella oneidensis (strain MR-1) OX=211586 GN=ybaK PE=3 SV=1
Q8EI39	NADH-ubiquinone oxidoreductase subunit L NuoL OS=Shewanella oneidensis (strain MR-1) OX=211586 GN=nuoL PE=4 SV=1
Q8EIB6	Uncharacterized protein OS=Shewanella oneidensis (strain MR-1) OX=211586 GN=SO_0927 PE=4 SV=1
Q8EIC7	Bifunctional MarR family transcriptional regulator/acteyltransferase GNAT family OS=Shewanella oneidensis (strain MR-1) OX=211586 GN=SO_0916 PE=4 SV=1
Q8EIJ6	Transcriptional regulator LysR family OS=Shewanella oneidensis (strain MR-1) OX=211586 GN=SO_0843 PE=4 SV=1
Q8EJG3	NAD(P)H-flavin reductase Fre OS=Shewanella oneidensis (strain MR-1) OX=211586 GN=fre PE=4 SV=1
Q8EJH8	ABC-type copper transport system ATPase component NosF OS=Shewanella oneidensis (strain MR-1) OX=211586 GN=nosF PE=4 SV=2
Q8EJT8	Transcriptional regulator LysR family OS=Shewanella oneidensis (strain MR-1) OX=211586 GN=SO_0369 PE=4 SV=1
Q8EJZ7	Membrane protein MAPEG superfamily OS=Shewanella oneidensis (strain MR-1) OX=211586 GN=SO_0309 PE=4 SV=1
Q8EK41	Heme exporter protein B OS=Shewanella oneidensis (strain MR-1) OX=211586 GN=ccmB PE=3 SV=1
Q8EKA0	tRNA 2-selenouridine synthase OS=Shewanella oneidensis (strain MR-1) OX=211586 GN=selU PE=3 SV=1
Q8EKE4	SAM-dependent methyltransferase type 11 OS=Shewanella oneidensis (strain MR-1) OX=211586 GN=SO_0151 PE=4 SV=1
Q8EKJ4	Histidine ammonia-lyase OS=Shewanella oneidensis (strain MR-1) OX=211586 GN=hutH PE=3 SV=1
CON__H-INV:HIT000292931
CON__Q3SX28
CON__Q9R0H5
REV__Q8EAA5	Metal dependent phosphohydrolase with response regulator receiver modulation OS=Shewanella oneidensis (strain MR-1) OX=211586 GN=SO_4003 PE=4 SV=1
REV__Q8ECB1	Sigma54-dependent transcriptional regulator for flagellar biosynthesis FlrA OS=Shewanella oneidensis (strain MR-1) OX=211586 GN=flrA PE=4 SV=1
REV__Q8EDL5	Protease HtpX OS=Shewanella oneidensis (strain MR-1) OX=211586 GN=htpX PE=3 SV=1
REV__Q8EEU5	Chaperone protein HscA homolog OS=Shewanella oneidensis (strain MR-1) OX=211586 GN=hscA PE=3 SV=1
Q8EE75	Endonuclease III OS=Shewanella oneidensis (strain MR-1) OX=211586 GN=nth PE=3 SV=1
Q8EC83	Polysaccharide biosynthesis related-protein OS=Shewanella oneidensis (strain MR-1) OX=211586 GN=SO_3261 PE=4 SV=1
Q8EGW7	Lipid binding/transport family protein YfjG OS=Shewanella oneidensis (strain MR-1) OX=211586 GN=yfjG PE=4 SV=1
Q8E8G0	Uncharacterized protein OS=Shewanella oneidensis (strain MR-1) OX=211586 GN=SO_4704 PE=4 SV=1
Q8E9P0	Ribosomal RNA small subunit methyltransferase H OS=Shewanella oneidensis (strain MR-1) OX=211586 GN=rsmH PE=3 SV=1
Q8EBL7	Transcriptional repressor of MexEF efflux pump MexR OS=Shewanella oneidensis (strain MR-1) OX=211586 GN=mexR PE=4 SV=2
Q8ECD3	RNA polymerase sigma factor FliA OS=Shewanella oneidensis (strain MR-1) OX=211586 GN=fliA PE=3 SV=1
Q8ECL1	Methylated-DNA--protein-cysteine methyltransferase OS=Shewanella oneidensis (strain MR-1) OX=211586 GN=ogt PE=3 SV=2
Q8EE10	Ribonuclease D OS=Shewanella oneidensis (strain MR-1) OX=211586 GN=rnd PE=3 SV=1
Q8EGE9	3(2)5-bisphosphate nucleotidase CysQ OS=Shewanella oneidensis (strain MR-1) OX=211586 GN=cysQ PE=4 SV=2
Q8EHA3	Radical SAM superfamily protein YhcC OS=Shewanella oneidensis (strain MR-1) OX=211586 GN=yhcC PE=4 SV=1
Q8EI18	Nicotinate-nucleotide--dimethylbenzimidazole phosphoribosyltransferase OS=Shewanella oneidensis (strain MR-1) OX=211586 GN=cobT PE=3 SV=1
Q8EJ98	Chemotaxis signal transduction system inhibitor of MCP methylation CheC OS=Shewanella oneidensis (strain MR-1) OX=211586 GN=cheC PE=4 SV=1
Q8EJV6	Uncharacterized protein OS=Shewanella oneidensis (strain MR-1) OX=211586 GN=SO_0350 PE=4 SV=1
K4PSM0	Transcriptional regulator LysR family OS=Shewanella oneidensis (strain MR-1) OX=211586 GN=SO_4526 PE=4 SV=1
P59352	UPF0229 protein SO_2883 OS=Shewanella oneidensis (strain MR-1) OX=211586 GN=SO_2883 PE=3 SV=1
Q8E9T9	dTDP-4-dehydrorhamnose reductase OS=Shewanella oneidensis (strain MR-1) OX=211586 GN=SO_4174 PE=3 SV=1
Q8EAE5	RNA polymerase sigma-54 factor OS=Shewanella oneidensis (strain MR-1) OX=211586 GN=rpoN PE=3 SV=1
Q8EAH7	Fe hydrogenase maturation rSAM protein HydE OS=Shewanella oneidensis (strain MR-1) OX=211586 GN=hydE PE=4 SV=1
Q8EB20	DnaJ domain protein OS=Shewanella oneidensis (strain MR-1) OX=211586 GN=SO_3716 PE=4 SV=1
Q8EB43	ABC-type macrolide family export system ATPase component OS=Shewanella oneidensis (strain MR-1) OX=211586 GN=SO_3692 PE=4 SV=1
Q8EB78	Uracil-DNA glycosylase OS=Shewanella oneidensis (strain MR-1) OX=211586 GN=ung PE=3 SV=1
Q8EBX7	Adenine glycosylase MutY OS=Shewanella oneidensis (strain MR-1) OX=211586 GN=mutY PE=4 SV=1
Q8ECP4	Uncharacterized protein OS=Shewanella oneidensis (strain MR-1) OX=211586 GN=SO_3091 PE=4 SV=1
Q8ECY1	Lambda phage lytic gene repressor CI OS=Shewanella oneidensis (strain MR-1) OX=211586 GN=cI PE=4 SV=1
Q8EDB5	Transcriptional regulator LysR family OS=Shewanella oneidensis (strain MR-1) OX=211586 GN=SO_2847 PE=4 SV=1
Q8EDD7	Uncharacterized response regulatory protein SO_2823 OS=Shewanella oneidensis (strain MR-1) OX=211586 GN=SO_2823 PE=3 SV=1
Q8EDG3	Oxidoreductase iron/ascorbate family OS=Shewanella oneidensis (strain MR-1) OX=211586 GN=SO_2789 PE=4 SV=1
Q8EDG4	23S rRNA (Guanine745-N1)-methyltransferase RlmA OS=Shewanella oneidensis (strain MR-1) OX=211586 GN=rlmA PE=4 SV=1
Q8EDM2	4-hydroxybenzoyl-CoA thioesterase family protein OS=Shewanella oneidensis (strain MR-1) OX=211586 GN=SO_2721 PE=4 SV=1
Q8EE50	Two component signal transduction system response regulator OS=Shewanella oneidensis (strain MR-1) OX=211586 GN=SO_2540 PE=4 SV=1
Q8EEH8	3-phosphoshikimate 1-carboxyvinyltransferase OS=Shewanella oneidensis (strain MR-1) OX=211586 GN=aroA PE=3 SV=1
Q8EF64	Chemotaxis signal transduction system methyl accepting sensory transducer OS=Shewanella oneidensis (strain MR-1) OX=211586 GN=SO_2123 PE=4 SV=1
Q8EFD1	Uncharacterized protein OS=Shewanella oneidensis (strain MR-1) OX=211586 GN=SO_2050 PE=4 SV=1
Q8EFE6	Uncharacterized protein OS=Shewanella oneidensis (strain MR-1) OX=211586 GN=SO_2034 PE=4 SV=1
Q8EFN4	Acteyltransferase GNAT family OS=Shewanella oneidensis (strain MR-1) OX=211586 GN=SO_1936 PE=4 SV=1
Q8EG74	Uncharacterized protein OS=Shewanella oneidensis (strain MR-1) OX=211586 GN=SO_1733 PE=4 SV=2
Q8EGM4	Disulfide reductase YfcG OS=Shewanella oneidensis (strain MR-1) OX=211586 GN=yfcG PE=3 SV=1
Q8EGX3	ADP-ribose binding domain-containing protein OS=Shewanella oneidensis (strain MR-1) OX=211586 GN=SO_1468 PE=4 SV=1
Q8EH23	Helicase OS=Shewanella oneidensis (strain MR-1) OX=211586 GN=SO_1408 PE=4 SV=1
Q8EH71	Ribosome maturation factor RimM OS=Shewanella oneidensis (strain MR-1) OX=211586 GN=rimM PE=3 SV=2
Q8EHG7	Signal transduction superfamily protein with modified HD-GYP domain OS=Shewanella oneidensis (strain MR-1) OX=211586 GN=SO_1254 PE=4 SV=2
Q8EHP6	DNA polymerase III delta subunit HolA OS=Shewanella oneidensis (strain MR-1) OX=211586 GN=holA PE=4 SV=1
Q8EHP7	Ribosomal silencing factor RsfS OS=Shewanella oneidensis (strain MR-1) OX=211586 GN=rsfS PE=3 SV=1
Q8EI92	5-3 ssDNA exonuclease RecJ OS=Shewanella oneidensis (strain MR-1) OX=211586 GN=recJ PE=4 SV=1
Q8EJ02	Mu phage uncharacterized protein OS=Shewanella oneidensis (strain MR-1) OX=211586 GN=SO_0673 PE=4 SV=2
Q8EJ87	Zn-binding protein OS=Shewanella oneidensis (strain MR-1) OX=211586 GN=SO_0581 PE=4 SV=1
Q8EJ89	Serine/threonine protein kinase OS=Shewanella oneidensis (strain MR-1) OX=211586 GN=SO_0579 PE=4 SV=1
Q8EJC2	Two component signal transduction system response regulator with diguanylate cyclase/phosphodiesterase acitivity OS=Shewanella oneidensis (strain MR-1) OX=211586 GN=SO_0545 PE=4 SV=2
Q8EJE6	Monooxygenase domain protein OS=Shewanella oneidensis (strain MR-1) OX=211586 GN=SO_0521 PE=4 SV=1
Q8EKF6	Molybdopterin/tungstopterin synthase sulfurylase MoeB OS=Shewanella oneidensis (strain MR-1) OX=211586 GN=moeB PE=4 SV=1
Q8EKI8	L-seryl-tRNA(Sec) selenium transferase OS=Shewanella oneidensis (strain MR-1) OX=211586 GN=selA PE=3 SV=1
CON__Q9C075
REV__Q8EC51	Inosine-5-monophosphate dehydrogenase OS=Shewanella oneidensis (strain MR-1) OX=211586 GN=guaB PE=3 SV=1
REV__Q8EIY2	Potassium efflux protein CPA2 family OS=Shewanella oneidensis (strain MR-1) OX=211586 GN=SO_0695 PE=3 SV=1
REV__Q8EG15	Peptidylprolyl isomerase OS=Shewanella oneidensis (strain MR-1) OX=211586 GN=ppiD PE=4 SV=1
Q8E9P6	UDP-N-acetylmuramoylalanine--D-glutamate ligase OS=Shewanella oneidensis (strain MR-1) OX=211586 GN=murD PE=3 SV=1
Q8EBP7	DNA repair protein RecN OS=Shewanella oneidensis (strain MR-1) OX=211586 GN=recN PE=3 SV=1
Q8EF12	Two component signal transduction system controlling sortase system response regulator OS=Shewanella oneidensis (strain MR-1) OX=211586 GN=SO_2193 PE=4 SV=1
Q8EFW7	Uncharacterized protein OS=Shewanella oneidensis (strain MR-1) OX=211586 GN=SO_1848 PE=4 SV=1
Q8EH98	RNA pyrophosphohydrolase OS=Shewanella oneidensis (strain MR-1) OX=211586 GN=rppH PE=3 SV=1
Q8EIF4	REG family ATPase YheS OS=Shewanella oneidensis (strain MR-1) OX=211586 GN=yheS PE=4 SV=1
Q8EJA9	tRNA 5-carboxymethoxyuridine methyltransferase OS=Shewanella oneidensis (strain MR-1) OX=211586 GN=smtA PE=3 SV=1
Q8EJR0	Transcriptional regulator LysR family OS=Shewanella oneidensis (strain MR-1) OX=211586 GN=SO_0402 PE=4 SV=1
Q8EKT0	DNA replication and repair protein RecF OS=Shewanella oneidensis (strain MR-1) OX=211586 GN=recF PE=3 SV=1
Q8E942	Cyclic pyranopterin monophosphate synthase OS=Shewanella oneidensis (strain MR-1) OX=211586 GN=moaC PE=3 SV=1
Q8E9H1	Adenylate cyclase CyaA OS=Shewanella oneidensis (strain MR-1) OX=211586 GN=cyaA PE=3 SV=1
Q8EC94	Flagellar basal body rod protein FlgB OS=Shewanella oneidensis (strain MR-1) OX=211586 GN=flgB PE=3 SV=1
Q8ECB2	Two component signal transduction system controlling flagellar biosynthesis histidine kinase with PAS sensory domain FlrB OS=Shewanella oneidensis (strain MR-1) OX=211586 GN=flrB PE=4 SV=1
Q8ECD5	Protein phosphatase CheZ OS=Shewanella oneidensis (strain MR-1) OX=211586 GN=cheZ PE=3 SV=1
Q8EEF1	Crossover junction endodeoxyribonuclease RuvC OS=Shewanella oneidensis (strain MR-1) OX=211586 GN=ruvC PE=3 SV=1
Q8EET4	Bifunctional transcriptional repressor of amino acid efflux GntR family / aminotransferase OS=Shewanella oneidensis (strain MR-1) OX=211586 GN=SO_2282 PE=4 SV=1
Q8EFU8	UPF0502 protein SO_1867 OS=Shewanella oneidensis (strain MR-1) OX=211586 GN=SO_1867 PE=3 SV=1
Q8EJ54	N-succinylglutamate 5-semialdehyde dehydrogenase OS=Shewanella oneidensis (strain MR-1) OX=211586 GN=astD PE=3 SV=1
Q8EJX6	UPF0061 protein SO_0330 OS=Shewanella oneidensis (strain MR-1) OX=211586 GN=SO_0330 PE=3 SV=1
Q8EK00	Outer membrane protein COG4775 family OS=Shewanella oneidensis (strain MR-1) OX=211586 GN=SO_0306 PE=4 SV=2
Q8EKQ0	Shikimate dehydrogenase (NADP(+)) OS=Shewanella oneidensis (strain MR-1) OX=211586 GN=aroE PE=3 SV=1
K4PTY7	Propionyl-CoA synthetase PrpE OS=Shewanella oneidensis (strain MR-1) OX=211586 GN=prpE PE=4 SV=1
Q8EB45	Two component signal transduction system Sigma54-dependent response regulator Fis family OS=Shewanella oneidensis (strain MR-1) OX=211586 GN=SO_3689 PE=4 SV=1
Q8ECB8	Flagellar protein export ATPase FliI OS=Shewanella oneidensis (strain MR-1) OX=211586 GN=fliI PE=4 SV=1
Q8EDU4	Transcriptional activator of cys regulon CysB OS=Shewanella oneidensis (strain MR-1) OX=211586 GN=cysB PE=4 SV=1
Q8EF92	Ni2+-binding GTPase involved in regulation of NiFe hydrogenase expression and maturation HypB OS=Shewanella oneidensis (strain MR-1) OX=211586 GN=hypB PE=4 SV=1
CON__P04259
Q8EFI3	Chemotaxis signal transduction system response regulator CheV OS=Shewanella oneidensis (strain MR-1) OX=211586 GN=cheV PE=4 SV=1
Q8EJS4	Integrase bacteriophage P4 family OS=Shewanella oneidensis (strain MR-1) OX=211586 GN=SO_0388 PE=3 SV=1
Q8EBV6	Bifunctional diguanylate cyclase/phosphodiesterase with PAS sensory domain OS=Shewanella oneidensis (strain MR-1) OX=211586 GN=SO_3389 PE=4 SV=1
CON__Q6KB66-1
CON__P04264
K4PU36	Predicted lipoprotein OS=Shewanella oneidensis (strain MR-1) OX=211586 GN=SO_4801 PE=4 SV=1
Q8EAB6	Fructose-1,6-bisphosphatase class 1 OS=Shewanella oneidensis (strain MR-1) OX=211586 GN=fbp PE=3 SV=1
Q8EAE0	Magnesium transporter MgtE OS=Shewanella oneidensis (strain MR-1) OX=211586 GN=SO_3966 PE=3 SV=1
Q8EAI0	Formate dehydrogenase cytochrome b Fdh OS=Shewanella oneidensis (strain MR-1) OX=211586 GN=fdh PE=4 SV=1
Q8EAQ5	Anti-sigma factor OS=Shewanella oneidensis (strain MR-1) OX=211586 GN=SO_3841 PE=4 SV=1
Q8EB46	Two component signal transduction system histidine kinase OS=Shewanella oneidensis (strain MR-1) OX=211586 GN=SO_3688 PE=4 SV=1
Q8EBD2	Uncharacterized protein OS=Shewanella oneidensis (strain MR-1) OX=211586 GN=SO_3593 PE=4 SV=2
Q8EFN0	Uncharacterized protein OS=Shewanella oneidensis (strain MR-1) OX=211586 GN=SO_1940 PE=4 SV=1
Q8EFX6	Uncharacterized protein OS=Shewanella oneidensis (strain MR-1) OX=211586 GN=SO_1839 PE=4 SV=1
Q8EGS9	Uncharacterized protein OS=Shewanella oneidensis (strain MR-1) OX=211586 GN=SO_1513 PE=4 SV=1
Q8EH75	Putative transporter HlyC/CorC (HCC) family OS=Shewanella oneidensis (strain MR-1) OX=211586 GN=SO_1354 PE=4 SV=1
Q8EHN1	Inner membrane protein with PepSY TM helix OS=Shewanella oneidensis (strain MR-1) OX=211586 GN=SO_1188 PE=4 SV=2
Q8EJF2	DUF3012 domain-containing lipoprotein OS=Shewanella oneidensis (strain MR-1) OX=211586 GN=SO_0515 PE=4 SV=2
REV__Q8EJ71	N-acetylmuramoyl-L-alanine amidase AmiB OS=Shewanella oneidensis (strain MR-1) OX=211586 GN=amiB PE=4 SV=1
Q8ED84	Glutaredoxin OS=Shewanella oneidensis (strain MR-1) OX=211586 GN=grxD PE=3 SV=2
Q8EDH7	Acyl-CoA thioesterase YciA OS=Shewanella oneidensis (strain MR-1) OX=211586 GN=yciA PE=4 SV=1
Q8EE78	Electron transport complex subunit D OS=Shewanella oneidensis (strain MR-1) OX=211586 GN=rnfD PE=3 SV=1
Q8EJM6	Cyclic di-GMP phosphodiesterase PdeB OS=Shewanella oneidensis (strain MR-1) OX=211586 GN=pdeB PE=1 SV=1
K4PW17	Uncharacterized protein OS=Shewanella oneidensis (strain MR-1) OX=211586 GN=SO_4805 PE=4 SV=1
Q8CMB0	ISSod13 transposase TnpA_ISSod13 OS=Shewanella oneidensis (strain MR-1) OX=211586 GN=tnpA_ISSod13 PE=4 SV=1
Q8E8B5	ATP synthase subunit c OS=Shewanella oneidensis (strain MR-1) OX=211586 GN=atpE PE=3 SV=1
Q8E8D4	Adenosine deaminase OS=Shewanella oneidensis (strain MR-1) OX=211586 GN=add PE=3 SV=1
Q8E8I7	3-deoxy-D-manno-octulosonic acid kinase OS=Shewanella oneidensis (strain MR-1) OX=211586 GN=kdkA PE=3 SV=1
Q8E8L5	Two component signal transduction system histidine kinase OS=Shewanella oneidensis (strain MR-1) OX=211586 GN=SO_4648 PE=4 SV=1
Q8E8P0	Two component signal transduction system histidine kinase OS=Shewanella oneidensis (strain MR-1) OX=211586 GN=SO_4622 PE=4 SV=1
Q8E8Y8	Fnr-inducible formate dehydrogenase accessory protein FdhX OS=Shewanella oneidensis (strain MR-1) OX=211586 GN=fdhX PE=4 SV=1
Q8E907	Two component signal transduction system histidine kinase OS=Shewanella oneidensis (strain MR-1) OX=211586 GN=SO_4488 PE=4 SV=1
Q8E990	FMN-dependent NADH-azoreductase OS=Shewanella oneidensis (strain MR-1) OX=211586 GN=azoR PE=3 SV=1
Q8E9B5	Acyl carrier protein OS=Shewanella oneidensis (strain MR-1) OX=211586 GN=acpP PE=3 SV=1
Q8E9E9	Phosphatidylglycerophosphatase B PgpB OS=Shewanella oneidensis (strain MR-1) OX=211586 GN=pgpB PE=4 SV=1
Q8E9I9	Exopolysaccharide synthesis protein OS=Shewanella oneidensis (strain MR-1) OX=211586 GN=SO_4288 PE=4 SV=1
Q8E9L3	Uncharacterized protein OS=Shewanella oneidensis (strain MR-1) OX=211586 GN=SO_4257 PE=4 SV=1
Q8EA63	Uncharacterized protein OS=Shewanella oneidensis (strain MR-1) OX=211586 GN=SO_4046 PE=4 SV=1
Q8EA97	Uncharacterized protein OS=Shewanella oneidensis (strain MR-1) OX=211586 GN=SO_4011 PE=4 SV=1
Q8EAF0	Arabinose 5-phosphate isomerase OS=Shewanella oneidensis (strain MR-1) OX=211586 GN=kdsD PE=3 SV=1
Q8EAL4	UPF0339 protein SO_3888 OS=Shewanella oneidensis (strain MR-1) OX=211586 GN=SO_3888 PE=1 SV=1
Q8EAP0	Phosphoesterase PA-phosphatase related protein OS=Shewanella oneidensis (strain MR-1) OX=211586 GN=SO_3857 PE=4 SV=1
Q8EAX2	Adenylate cyclase YgiF OS=Shewanella oneidensis (strain MR-1) OX=211586 GN=ygiF PE=4 SV=1
Q8EB21	Bifunctional oxygen-insensitive NAD(P)H nitroreductase/dihydropteridine reductase NfnB OS=Shewanella oneidensis (strain MR-1) OX=211586 GN=nfnB PE=4 SV=1
Q8EB58	Uncharacterized protein OS=Shewanella oneidensis (strain MR-1) OX=211586 GN=SO_3676 PE=4 SV=1
Q8EBA0	Predicted outer membrane protein OS=Shewanella oneidensis (strain MR-1) OX=211586 GN=SO_3632 PE=4 SV=2
Q8EBA2	Predicted lipoprotein OS=Shewanella oneidensis (strain MR-1) OX=211586 GN=SO_3630 PE=4 SV=1
Q8EBD3	Outer membrane MltA-interaction protein MipA OS=Shewanella oneidensis (strain MR-1) OX=211586 GN=mipA PE=4 SV=2
Q8EBG4	N5-carboxyaminoimidazole ribonucleotide mutase OS=Shewanella oneidensis (strain MR-1) OX=211586 GN=purE PE=3 SV=1
Q8EBU0	OsmC/Ohr family protein OS=Shewanella oneidensis (strain MR-1) OX=211586 GN=SO_3409 PE=4 SV=1
Q8EBV8	Uncharacterized protein OS=Shewanella oneidensis (strain MR-1) OX=211586 GN=SO_3387 PE=4 SV=1
Q8ECN0	Extracellular serine alkaline protease SapSH OS=Shewanella oneidensis (strain MR-1) OX=211586 GN=sapSH PE=4 SV=1
Q8ECN9	RNA polymerase sigma factor OS=Shewanella oneidensis (strain MR-1) OX=211586 GN=SO_3096 PE=3 SV=1
Q8ECW8	Lambda phage type II restriction-modification system DNA N-6-adenine-methyltransferase Dam OS=Shewanella oneidensis (strain MR-1) OX=211586 GN=dam PE=4 SV=1
Q8ECZ1	Lambda phage protein OS=Shewanella oneidensis (strain MR-1) OX=211586 GN=SO_2980 PE=4 SV=1
Q8EDG1	Cytidine deaminase OS=Shewanella oneidensis (strain MR-1) OX=211586 GN=cdd PE=3 SV=1
Q8EDJ6	TolA energy-transducing system inner membrane component TolR OS=Shewanella oneidensis (strain MR-1) OX=211586 GN=tolR PE=3 SV=1
Q8EDN2	Predicted lipoprotein OS=Shewanella oneidensis (strain MR-1) OX=211586 GN=SO_2711 PE=4 SV=1
Q8EDN3	DoxD-like inner membrane protein OS=Shewanella oneidensis (strain MR-1) OX=211586 GN=SO_2710 PE=4 SV=1
Q8EDQ7	Mu phage uncharacterized protein OS=Shewanella oneidensis (strain MR-1) OX=211586 GN=SO_2686 PE=4 SV=1
Q8EE05	Uncharacterized protein OS=Shewanella oneidensis (strain MR-1) OX=211586 GN=SO_2585 PE=4 SV=1
Q8EE21	Putative cytoplasmic protein OS=Shewanella oneidensis (strain MR-1) OX=211586 GN=SO_2569 PE=4 SV=1
Q8EE70	Transcriptional regulator AraC family OS=Shewanella oneidensis (strain MR-1) OX=211586 GN=SO_2519 PE=4 SV=1
Q8EEA6	Sodium:proton antiporter NhaC family OS=Shewanella oneidensis (strain MR-1) OX=211586 GN=SO_2481 PE=4 SV=1
Q8EEA8	Uncharacterized protein OS=Shewanella oneidensis (strain MR-1) OX=211586 GN=SO_2479 PE=4 SV=1
Q8EEC3	Glucan 14-alpha-glucosidase Cga OS=Shewanella oneidensis (strain MR-1) OX=211586 GN=cga PE=4 SV=2
Q8EEL7	Cbb3-type cytochrome c oxidase subunit IV CcoQ OS=Shewanella oneidensis (strain MR-1) OX=211586 GN=ccoQ PE=4 SV=1
Q8EET6	Drug:H+ antiporter DHA1 family OS=Shewanella oneidensis (strain MR-1) OX=211586 GN=SO_2280 PE=4 SV=1
Q8EEW4	L-serine ammonia-lyase SdaA OS=Shewanella oneidensis (strain MR-1) OX=211586 GN=sdaA PE=4 SV=1
Q8EEZ0	Predicted membrane protein OS=Shewanella oneidensis (strain MR-1) OX=211586 GN=SO_2219 PE=4 SV=1
Q8EFK2	Uncharacterized protein OS=Shewanella oneidensis (strain MR-1) OX=211586 GN=SO_1969 PE=4 SV=1
Q8EFP3	Succinate dehydrogenase cytochrome b556 subunit SdhC OS=Shewanella oneidensis (strain MR-1) OX=211586 GN=sdhC PE=4 SV=1
Q8EFP9	Uncharacterized protein OS=Shewanella oneidensis (strain MR-1) OX=211586 GN=SO_1921 PE=4 SV=1
Q8EG22	Cysteine--tRNA ligase OS=Shewanella oneidensis (strain MR-1) OX=211586 GN=cysS PE=3 SV=1
Q8EGH3	Uridylate kinase OS=Shewanella oneidensis (strain MR-1) OX=211586 GN=pyrH PE=3 SV=1
Q8EGT8	Periplasmic substrate binding protein family 3 OS=Shewanella oneidensis (strain MR-1) OX=211586 GN=SO_1503 PE=4 SV=1
K4PU17	Pseudouridine synthase OS=Shewanella oneidensis (strain MR-1) OX=211586 GN=rluD PE=3 SV=1
Q8EH24	Hg(II) uptake system substrate-binding component MerP family OS=Shewanella oneidensis (strain MR-1) OX=211586 GN=SO_1407 PE=4 SV=1
Q8EHF9	Uncharacterized protein OS=Shewanella oneidensis (strain MR-1) OX=211586 GN=SO_1262 PE=4 SV=1
Q8EHQ9	DNA-binding ferritin-like protein (Oxidative damage protectant) DpsA OS=Shewanella oneidensis (strain MR-1) OX=211586 GN=dpsA PE=3 SV=1
Q8EHU3	Hypoxanthine/guanine permease AzgA family OS=Shewanella oneidensis (strain MR-1) OX=211586 GN=SO_1120 PE=4 SV=1
Q8EI94	Branched-chain amino acid transport system carrier protein OS=Shewanella oneidensis (strain MR-1) OX=211586 GN=brnQ PE=3 SV=2
Q8EIA6	Uncharacterized protein OS=Shewanella oneidensis (strain MR-1) OX=211586 GN=SO_0937 PE=4 SV=1
Q8EIH6	Uncharacterized protein OS=Shewanella oneidensis (strain MR-1) OX=211586 GN=yjdF PE=4 SV=1
Q8EIT6	Uncharacterized protein OS=Shewanella oneidensis (strain MR-1) OX=211586 GN=SO_0748 PE=4 SV=2
Q8EIZ7	Mu phage uncharacterized protein OS=Shewanella oneidensis (strain MR-1) OX=211586 GN=SO_0678 PE=4 SV=1
Q8EIZ8	Uncharacterized protein OS=Shewanella oneidensis (strain MR-1) OX=211586 GN=SO_0677 PE=4 SV=1
Q8EJ13	Uncharacterized protein OS=Shewanella oneidensis (strain MR-1) OX=211586 GN=SO_0662 PE=4 SV=1
Q8EJ16	Lysozyme OS=Shewanella oneidensis (strain MR-1) OX=211586 GN=SO_0659 PE=3 SV=1
Q8EJ29	Mu phage transposase OrfB TnpA_MuSo1b OS=Shewanella oneidensis (strain MR-1) OX=211586 GN=tnpA PE=4 SV=1
Q8EJ52	Two component signal transduction system histidine kinase OS=Shewanella oneidensis (strain MR-1) OX=211586 GN=SO_0621 PE=4 SV=1
Q8EJ53	Putative hydrolase involved in arginine and ornithine metabolism OS=Shewanella oneidensis (strain MR-1) OX=211586 GN=SO_0620 PE=4 SV=1
Q8EJA0	Regulator of ribonuclease activity B OS=Shewanella oneidensis (strain MR-1) OX=211586 GN=rraB PE=3 SV=1
Q8EJA6	Membrane protein OS=Shewanella oneidensis (strain MR-1) OX=211586 GN=SO_0562 PE=4 SV=1
Q8EJA7	Formate--tetrahydrofolate ligase OS=Shewanella oneidensis (strain MR-1) OX=211586 GN=fhs PE=3 SV=1
Q8EJI0	ABC-type copper uptake system periplasmic chaperone component NosL OS=Shewanella oneidensis (strain MR-1) OX=211586 GN=nosL PE=4 SV=1
Q8EJI2	4Fe-4S ferredoxin SirC OS=Shewanella oneidensis (strain MR-1) OX=211586 GN=sirC PE=4 SV=1
Q8EJY1	Protein YchN OS=Shewanella oneidensis (strain MR-1) OX=211586 GN=ychN PE=4 SV=1
Q8EK20	Shikimate kinase OS=Shewanella oneidensis (strain MR-1) OX=211586 GN=aroK PE=3 SV=1
Q8EKD8	Proton:glutamate symporter DAACS family OS=Shewanella oneidensis (strain MR-1) OX=211586 GN=SO_0157 PE=3 SV=1
Q8EKE8	Predicted periplasmic protein OS=Shewanella oneidensis (strain MR-1) OX=211586 GN=SO_0147 PE=4 SV=1
Q8EKP5	Protein YibQ OS=Shewanella oneidensis (strain MR-1) OX=211586 GN=yibQ PE=4 SV=1
Q8EKT1	Beta sliding clamp OS=Shewanella oneidensis (strain MR-1) OX=211586 GN=dnaN PE=3 SV=1
Q8EKT4	Ribonuclease P protein component OS=Shewanella oneidensis (strain MR-1) OX=211586 GN=rnpA PE=3 SV=1
CON__P02754
Q8EHQ0	Peptidoglycan glycosyltransferase MrdB OS=Shewanella oneidensis (strain MR-1) OX=211586 GN=mrdB PE=3 SV=2
CON__P07477
REV__Q8EEB6	Succinyl-diaminopimelate desuccinylase OS=Shewanella oneidensis (strain MR-1) OX=211586 GN=dapE PE=3 SV=1
REV__Q8E852	Type II toxin-antitoxin system antidote component CC2985 family OS=Shewanella oneidensis (strain MR-1) OX=211586 GN=SO_A0078 PE=4 SV=1
REV__Q8E8Y4	TonB-dependent siderophore receptor OS=Shewanella oneidensis (strain MR-1) OX=211586 GN=SO_4516 PE=3 SV=1
REV__Q8EAF9	Serine protease DegS OS=Shewanella oneidensis (strain MR-1) OX=211586 GN=degS PE=4 SV=1
REV__Q8EB78	Uracil-DNA glycosylase OS=Shewanella oneidensis (strain MR-1) OX=211586 GN=ung PE=3 SV=1
REV__Q8EB95	Chaperone SurA OS=Shewanella oneidensis (strain MR-1) OX=211586 GN=surA PE=3 SV=1
REV__Q8EC68	Outer membrane protein FadL family OS=Shewanella oneidensis (strain MR-1) OX=211586 GN=SO_3276 PE=4 SV=1
REV__Q8EC82	TPP-dependent enzyme involved in flagella modificaiton OS=Shewanella oneidensis (strain MR-1) OX=211586 GN=SO_3262 PE=3 SV=1
REV__Q8ECD1	Flagellar polar localization control system flagellar assembly determinant GTPase FlhF OS=Shewanella oneidensis (strain MR-1) OX=211586 GN=flhF PE=4 SV=1
REV__Q8EF55	Aldehyde-alcohol dehydrogenase OS=Shewanella oneidensis (strain MR-1) OX=211586 GN=adhE PE=3 SV=1
REV__Q8EF83	FAD:protein FMN transferase OS=Shewanella oneidensis (strain MR-1) OX=211586 GN=SO_2103 PE=3 SV=2
REV__Q8EG73	Glyoxalase family protein OS=Shewanella oneidensis (strain MR-1) OX=211586 GN=SO_1734 PE=4 SV=1
Q8ECR2	Erythronate-4-phosphate dehydrogenase OS=Shewanella oneidensis (strain MR-1) OX=211586 GN=pdxB PE=3 SV=1
Q8EEE1	Thiazole synthase OS=Shewanella oneidensis (strain MR-1) OX=211586 GN=thiG PE=3 SV=1
Q8EI70	Hydroperoxide resistance transcriptional regulator OhrR OS=Shewanella oneidensis (strain MR-1) OX=211586 GN=ohrR PE=4 SV=1
Q7ZAJ5	Tyrosine recombinase XerC OS=Shewanella oneidensis (strain MR-1) OX=211586 GN=xerC PE=3 SV=2
Q8E8G5	Oligopeptidase A PrlC OS=Shewanella oneidensis (strain MR-1) OX=211586 GN=prlC PE=3 SV=1
Q8E8L0	ABC-type sulfate/thiosulfate uptakesystem permease component 1 CysT OS=Shewanella oneidensis (strain MR-1) OX=211586 GN=cysT PE=4 SV=2
Q8E8Q4	Cytochrome c oxidase subunit 1 OS=Shewanella oneidensis (strain MR-1) OX=211586 GN=coxA PE=3 SV=1
Q8E9C7	Extracellular oxidoreductase FeS binding subunit OS=Shewanella oneidensis (strain MR-1) OX=211586 GN=SO_4357 PE=4 SV=1
[truncated: 203 more rows]
